# Supplementary material for: Cross-sectional analyses of participation in cancer screening and use of hormone replacement therapy and medications in meat eaters and vegetarians: the EPIC-Oxford study
Source: PubMed Central journal article supplement (PMC5770904; doi:10.1136/bmjopen-2017-018245), 2017-12-27
Supplement: bmjopen-2017-018245.draft_revisions.pdf [file bmjopen-2017-018245.draft_revisions.pdf]

# BMJ Open

BMJ Open is committed to open peer review. As part of this commitment we make the peer review history of every article we publish publicly available.

When an article is published we post the peer reviewers' comments and the authors' responses online. We also post the versions of the paper that were used during peer review. These are the versions that the peer review comments apply to.

The versions of the paper that follow are the versions that were submitted during the peer review process. They are not the versions of record or the final published versions. They should not be cited or distributed as the published version of this manuscript.

BMJ Open is an open access journal and the full, final, typeset and author-corrected version of record of the manuscript is available on our site with no access controls, subscription charges or pay-per-view fees (<http://bmjopen.bmj.com>).

If you have any questions on BMJ Open's open peer review process please email [editorial.bmjopen@bmj.com](mailto:editorial.bmjopen@bmj.com)

# BMJ Open

## Cross-sectional analyses of participation in cancer screening and use of hormone replacement therapy and medications in meat eaters and vegetarians: the EPIC-Oxford study.

|                                 |                                                                                                                                                                                                                                               |
|---------------------------------|-----------------------------------------------------------------------------------------------------------------------------------------------------------------------------------------------------------------------------------------------|
| Journal:                        | <i>BMJ Open</i>                                                                                                                                                                                                                               |
| Manuscript ID                   | bmjopen-2017-018245                                                                                                                                                                                                                           |
| Article Type:                   | Research                                                                                                                                                                                                                                      |
| Date Submitted by the Author:   | 15-Jun-2017                                                                                                                                                                                                                                   |
| Complete List of Authors:       | Tong, Tammy Yin Ni; Cancer Epidemiology Unit, Appleby, P; Cancer Epidemiology Unit, University of Oxford<br>Bradbury, Kathryn; Cancer Epidemiology Unit, University of Oxford<br>Key, Timothy; Cancer Epidemiology Unit, University of Oxford |
| <b>Primary Subject Heading</b>: | Epidemiology                                                                                                                                                                                                                                  |
| Secondary Subject Heading:      | Nutrition and metabolism, Oncology                                                                                                                                                                                                            |
| Keywords:                       | NUTRITION & DIETETICS, ONCOLOGY, HEALTH SERVICES ADMINISTRATION & MANAGEMENT                                                                                                                                                                  |
|                                 |                                                                                                                                                                                                                                               |

SCHOLARONE™  
Manuscripts

1  
2  
3 1 **Cross-sectional analyses of participation in cancer screening and use of hormone**  
4  
5 2 **replacement therapy and medications in meat eaters and vegetarians: the EPIC-Oxford**  
6  
7 3 **study.**  
8  
9

10 4 Tammy Y.N. Tong<sup>1</sup>, Paul N. Appleby<sup>1</sup>, Kathryn E. Bradbury<sup>1</sup>, Timothy J. Key<sup>1</sup>  
11  
12  
13 5

14  
15  
16 6 1. Cancer Epidemiology Unit, Nuffield Department of Population Health, University of  
17  
18 7 Oxford, UK  
19  
20  
21 8

22  
23  
24 9 Corresponding author: Tammy Y.N. Tong  
25  
26

27 10 Postal address: Cancer Epidemiology Unit, University of Oxford, Richard Doll Building, Old  
28  
29 11 Road Campus, Oxford, OX3 7LF  
30  
31

32 12 Tel: +44 (0) 1865 289653  
33  
34

35 13 Email: tammy.tong@ceu.ox.ac.uk  
36  
37  
38 14

39  
40  
41 15 Word count: 2996 words  
42  
43  
44 16

45  
46  
47 17 Keywords: vegetarians; cancer screening; hormone replacement therapy; medication use  
48  
49  
50  
51  
52  
53  
54  
55  
56  
57  
58  
59  
60

1  
2  
3 18 **ABSTRACT (250 words)**  
4  
5

6 19 **Objectives:** To examine differences in health-related behaviours such as screening or testing  
7  
8 20 for cancer, use of hormone replacement therapy (HRT), and use of other medications in  
9  
10 21 different diet groups.

11  
12  
13 22 **Design:** We studied 31,260 participants across four diet groups (18,155 meat eaters, 5,012  
14  
15 23 fish eaters, 7,179 vegetarians, 914 vegans) in the UK EPIC-Oxford cohort. Questions were  
16  
17 24 asked in follow-up questionnaires regarding participation in breast screening, cervical  
18  
19 25 screening, prostate specific antigen (PSA) testing, use of HRT, and use of medications for the  
20  
21 26 past four weeks. Using Poisson regression, we estimated the prevalence ratios (PR) for each  
22  
23 27 outcome across people of different diet groups, using meat-eaters as the reference group.

24  
25  
26  
27 28 **Results:** Compared to meat-eaters, vegetarian (PR; 95% confidence interval: 0.94; 0.89,  
28  
29 29 0.98) and vegan (0.82; 0.71, 0.95) women had lower participation in breast screening, and  
30  
31 30 vegetarian men were less likely to undergo PSA testing (0.82; 0.71, 0.96). No differences  
32  
33 31 were observed among women for cervical screening. In women, all non-meat eating groups  
34  
35 32 had lower use of HRT compared to meat-eaters ( $p$  heterogeneity $<0.0001$ ). Lower reported  
36  
37 33 use of any medication was observed for participants in all non-meat eating groups with no or  
38  
39 34 one self-reported illness ( $p$  heterogeneity $\leq 0.0002$ ). No heterogeneity was observed across the  
40  
41 35 diet groups for the reported use of specific medication for high blood pressure, high blood  
42  
43 36 cholesterol, asthma, diabetes, and thyroid disease.

44  
45  
46  
47 37 **Conclusions:** Differences in breast screening, PSA testing, HRT use and overall medication  
48  
49 38 use were observed across the diet groups. Whether such differences contribute to differential  
50  
51 39 long-term disease risks requires further study.  
52  
53  
54  
55  
56  
57  
58  
59  
60

**Strengths and limitations of this study**

- This study is the first to simultaneously examine prevalence of breast and cervical cancer screening, prostate specific antigen testing, hormone replacement therapy (HRT) use and medication use in different diet groups.
- The study includes a large number of participants recruited from across different regions in the United Kingdom, with a high proportion of fish eaters, vegetarians, and vegans.
- Recall bias is possible because assessment of cancer screening or testing, HRT use and medication use was based on self-report, although there is no indication that such misclassification bias should differ by diet group.
- The study is cross-sectional and we cannot infer causality.

40

## 41 INTRODUCTION

42 People of different habitual diet groups have been shown to have different health  
43 characteristics. Compared to meat eaters, vegetarians generally have lower BMI, blood  
44 pressure, and circulating low density lipoprotein cholesterol levels [1–3], characteristics  
45 likely to reduce disease risk. However, evidence on the long-term risk of many non-  
46 communicable diseases across people of different diet groups remains inconclusive. For  
47 example, although both a United Kingdom (UK) [4] and a United States (US) [5] study  
48 reported lower risk of overall cancer incidence with a vegetarian diet, the associations for  
49 specific types of cancer are heterogeneous. For cardiovascular diseases, vegetarians in EPIC-  
50 Oxford have been observed to have lower ischaemic heart disease risk (hospitalization and  
51 death combined) [6], but no significant difference in ischaemic heart disease mortality was  
52 observed between diet groups in the same population [7].

53 The reason for this apparent difference in risk of incident ischaemic heart disease and  
54 ischaemic heart disease mortality in vegetarians is unclear. One possible explanation could be  
55 the differential use of appropriate medications in the different diet groups, which  
56 subsequently influence disease mortality. In a Belgian population for example, vegetarians  
57 had a lower use of prescription medications compared to non-vegetarians, but similar use of  
58 non-prescription drugs [8]. On the other hand, differences in other health related behaviours,  
59 such as participation in cancer screening or use of hormone replacement therapy (HRT), may  
60 also contribute to differences in cancer risk across the diet groups. Results from a Swedish  
61 cohort [9] and a US cohort [10] showed that vegetarians (including vegans and people who  
62 ate fish but not meat) had lower odds of attending breast screening and prostate cancer  
63 screening respectively, when compared to meat eaters. Overall, literature on participation in  
64 screening and use of medication across people of different diet groups is scarce, and to our  
65 knowledge no studies have specifically examined the use of HRT in different diet groups.

1  
2  
3 66 Therefore, the aim of this study was to assess participation in cancer screening or testing, and  
4  
5 67 use of HRT and other medications among people of different diet groups in a large  
6  
7 68 population-based cohort in the UK with a high percentage of vegetarians.  
8  
9

10 69

## 11 12 13 70 **METHODS**

### 14 15 16 71 **Study population**

17  
18  
19 72 The EPIC-Oxford study is a UK based cohort recruited between 1993 and 1999. The study  
20  
21 73 protocol was approved by a Multicentre Research Ethics Committee (Scotland A Research  
22  
23 74 Ethics Committee) and participants gave written informed consent. Details of the recruitment  
24  
25 75 process have been described previously [1]. In brief, a combination of general practitioner  
26  
27 76 (GP) recruitment and postal recruitment was used. The GP recruitment invited men and  
28  
29 77 women aged 35 to 59 years registered with participating GPs and recruited 7,421 participants.  
30  
31  
32 78 The postal recruitment was targeted at vegetarians, vegans, and other people interested in diet  
33  
34 79 and health, and recruited 57,990 participants aged 20 or above. All participants included in  
35  
36 80 this analysis completed a full recruitment questionnaire which asked about their habitual diet  
37  
38 81 and other health and lifestyle characteristics. A follow-up questionnaire was then sent to  
39  
40 82 surviving participants approximately 5 years after recruitment (mostly from 2000 to 2003),  
41  
42 83 and a second follow-up questionnaire was mailed approximately 10 years after recruitment  
43  
44 84 (mostly in 2007). In the follow-up questionnaires, updated information was gathered on diet,  
45  
46 85 health and lifestyle, including self-reported current health.  
47  
48  
49

50 86  
51  
52  
53  
54  
55  
56  
57  
58  
59  
60

### 87 **Assessment of diet group**

88 In the recruitment questionnaire and each subsequent follow-up questionnaire, four questions  
89 were asked regarding consumption of meat, fish, dairy products, and eggs. Responses to these  
90 questions were used to assign participants to one of four diet groups at each time point: meat  
91 eaters (participants who ate meat, irrespective of whether they ate fish, dairy products or  
92 eggs); fish eaters (participants who did not eat meat but did eat fish); vegetarians (participants  
93 who did not eat meat or fish, but did eat one or both of dairy products and eggs), and vegans  
94 (participants who did not eat meat, fish, dairy products, or eggs).

### 96 **Assessment of participation in screening, HRT and medication use**

97 In the follow-up questionnaires, women were asked if they had ever had a breast screening by  
98 mammography, cervical screening by the smear test (only on the 5 year follow-up  
99 questionnaire), or used HRT, and men were asked if they had ever had a prostate specific  
100 antigen (PSA) test (only on the 10 year follow-up questionnaire). On the 10 year follow-up  
101 questionnaire, all participants were asked if they had used any medication for most of the last  
102 four weeks, with 36 named medications and a free text field for reporting regular use of any  
103 medication not on the list; participants were also asked if they had been diagnosed with any  
104 of a list of 29 medical conditions, and the year when the condition was first diagnosed. The  
105 corresponding question on medication use on the 5 year questionnaire was shorter, with 20  
106 named medications and 26 medical conditions.

107 For assessment of specific medication use, five common medical conditions associated with  
108 specific medications were identified: high blood pressure (commonly treated with one or  
109 more of amlodipine, enalapril, frusemide, propranol, atenolol, bendrofluzide, lisinopril and



1  
2  
3 110 nifedipine), high blood cholesterol (atorvastatin and simvastatin), asthma (beclomethasone  
4  
5 111 and salbutamol), diabetes (insulin and metformin), and thyroid disease (thyroxine).

6  
7  
8 112

9  
10  
11 113 **Statistical analyses**

12  
13  
14 114 Information on assignment to diet group and assessment of health behaviour from the 10 year  
15  
16 115 follow-up questionnaire was used for our analyses, except for the assessment of participation  
17  
18 116 in cervical screening which was only asked on the 5 year follow-up questionnaire.  
19  
20 117 Participants were excluded from all analysis if they did not answer the relevant questions to  
21  
22 118 be assigned to an appropriate diet group (n=28), or if they did not answer the relevant  
23  
24 119 question on medication use (n=407). For the analyses related to participation in breast  
25  
26 120 screening, cervical screening, PSA testing or HRT use, only women or men who answered  
27  
28 121 the relevant question and were in the specified age group at questionnaire completion were  
29  
30 122 included. The age group specifications were as follows: age 50 to 74 years for breast  
31  
32 123 screening, age 25 to 74 years for cervical screening, age 50 to 84 years for PSA testing, and  
33  
34 124 age 50 to 74 years for HRT use. For HRT use, we further restricted the analysis to post-  
35  
36 125 menopausal women.

37  
38  
39  
40 126 For each analysis, we used Poisson regression to estimate prevalence ratios (95% confidence  
41  
42 127 intervals, CI) of cancer screening or testing (breast screening, cervical screening, PSA  
43  
44 128 testing), HRT use, or medication use in different diet groups, using meat eaters as the  
45  
46 129 reference group. The analyses for cancer screening or testing and use of HRT adjusted for age  
47  
48 130 at follow-up (<40, 40-44, 45-49, 50-54, 55-59, 60-64, 65-69, 70-74, ≥75 years as appropriate  
49  
50 131 for the age range included in the analysis), region of recruitment (eight geographical regions  
51  
52 132 across the UK), and self-reported current health (excellent, good, fair, poor, unknown).

1  
2  
3 133 We estimated prevalence ratios of any medication use in each diet group compared to meat  
4  
5 134 eaters, adjusting for the cross-stratification of sex and age at follow-up, region of recruitment,  
6  
7 135 self-reported current health, and the number of self-reported illnesses or conditions (0, 1, 2, 3,  
8  
9 136  $\geq 4$ ). Additionally, we repeated the analyses stratified by the number of self-reported illnesses  
10  
11 137 or conditions using the above categorisation. Subsequently, for each of high blood pressure,  
12  
13 138 high blood cholesterol, asthma, diabetes, and thyroid disease, we estimated the prevalence  
14  
15 139 ratios of taking appropriate medication by diet group among people diagnosed with each  
16  
17 140 condition in turn, adjusting for covariates as above and additionally for years since reported  
18  
19 141 diagnosis, calculated as year of follow-up questionnaire completion minus reported year of  
20  
21 142 diagnosis (<2, 2-3, 4-5, 6-9,  $\geq 10$  years, unknown).

22  
23  
24  
25 143 As sensitivity analyses, we repeated the analyses as follows: using data from the 5 year  
26  
27 144 follow-up questionnaire where available; and further adjusting for smoking status, alcohol  
28  
29 145 consumption, and Townsend deprivation index. All statistical analyses were performed using  
30  
31 146 Stata release 14.1 (StataCorp), and *P* values < 0.05 were considered statistically significant.  
32  
33  
34  
35 147

## 36 37 148 **RESULTS**

### 38 39 40 149 **Cohort characteristics**

41  
42  
43 150 After excluding participants who did not answer the relevant questions on diet group or on  
44  
45 151 medication use, data for 31,260 participants who completed the 10 year follow-up  
46  
47 152 questionnaire (18,155 meat eaters, 5,012 fish eaters, 7,179 vegetarians, and 914 vegans) were  
48  
49 153 used for most of the analyses. Characteristics of the participants are presented in **Table 1**.  
50  
51 154 Overall, non-meat eaters were younger, more likely to report having excellent health, less  
52  
53  
54  
55  
56  
57  
58  
59  
60

1  
2  
3 155 likely to be taking medication in the past four weeks, and less likely to have reported any  
4  
5 156 illnesses or conditions.

6  
7  
8 157

### 9 10 11 158 **Participation in screening and use of HRT and medications**

12  
13  
14 159 Overall, 14,016 women were included in the analyses for breast screening, 27,781 women for  
15  
16 160 cervical screening, and 4,783 men for PSA testing (**Table 2**). In women, compared with meat  
17  
18 161 eaters, vegetarians (prevalence ratio; 95% CI: 0.94; 0.89, 0.98) and vegans (0.82; 0.71, 0.95),  
19  
20 162 but not fish eaters (0.96; 0.92, 1.01) had lower prevalence of breast screening, but no  
21  
22 163 significant heterogeneity was observed between the diet groups for participating in cervical  
23  
24 164 screening ( $P$ -heterogeneity=0.37). In men, vegetarians (0.82; 0.71, 0.96), but not fish eaters  
25  
26 165 (0.99; 0.85, 1.17) or vegans (0.72; 0.50, 1.02), had significantly lower prevalence of PSA  
27  
28 166 testing compared with meat eaters. For HRT use, women who were non-meat eaters reported  
29  
30 167 lower use (fish eaters: 0.80; 0.73, 0.88; vegetarians: 0.74; 0.68, 0.81; vegans: 0.42; 0.30,  
31  
32 168 0.60) compared with women who were meat eaters (**Table 3**).

33  
34  
35  
36 169 Irrespective of the number of self-reported illnesses and conditions, non-meat eaters reported  
37  
38 170 lower use of any medication (fish eaters: 0.92; 0.87, 0.96; vegetarians: 0.93; 0.89, 0.98;  
39  
40 171 vegans 0.71; 0.63, 0.81) compared with meat eaters (**Table 4**). When the analyses were  
41  
42 172 stratified by the number of self-reported illnesses or conditions, non-meat eaters with no or  
43  
44 173 one illness or condition had reported lower medication use compared to meat eaters ( $P$ -  
45  
46 174 heterogeneity $\leq$ 0.0002), but the association was attenuated and no longer statistically  
47  
48 175 significant among participants with two, three, or four or more illnesses or conditions. For  
49  
50 176 medication use specific to several common illnesses and conditions, no significant  
51  
52 177 differences were observed between the diet groups in the reported use of appropriate  
53  
54 178 medications for high blood pressure, high blood cholesterol, asthma, diabetes, or thyroid

1  
2  
3 179 disease, among participants diagnosed with each of these conditions (**Table 5**). Results were  
4  
5 180 consistent when we repeated the analyses where possible using data from the 5 year follow-  
6  
7 181 up questionnaire, or when we further adjusted for smoking, alcohol consumption, and  
8  
9 182 Townsend deprivation index (results not shown).  
10  
11

12 183

## 15 184 **DISCUSSION**

### 18 185 **Summary of results**

21 186 In this UK population based cohort with a large proportion of participants from different diet  
22  
23 187 groups, we generally observed lower participation in breast screening and lower HRT use  
24  
25 188 among women who were non-meat eaters (separately categorised as fish eaters, vegetarians,  
26  
27 189 and vegans) compared with women who were meat eaters. Vegetarian men had lower  
28  
29 190 participation in PSA testing compared with meat eating men, but no significant difference  
30  
31 191 was observed for cervical screening in women across the diet groups. For medication use,  
32  
33 192 non-meat eaters were less likely to report taking medications than meat eaters overall, but  
34  
35 193 there were no significant differences in people reporting two or more illnesses or conditions,  
36  
37 194 or for people reporting taking specific medications for various self-reported conditions.  
38  
39

40  
41 195

### 44 196 **Comparison with other studies**

47 197 Few studies have reported on the participation in cancer screening or testing, HRT use or  
48  
49 198 medication use among people of different diet groups, and no study has assessed all these  
50  
51 199 behaviours simultaneously in the same cohort. For breast cancer screening, consistent with  
52  
53 200 our findings, the Swedish Malmö Diet and Cancer Study reported that non-attendance for  
54  
55 201 breast cancer screening was more likely in people who were vegetarians or vegans (odds ratio  
56  
57

1  
2  
3 202 or OR; 95% confidence interval: 1.49; 1.11, 1.99) [9]. Analyses of data from the Adventist  
4  
5 203 Health Study-2 in the United States and Canada showed that all non-meat eaters were less  
6  
7 204 likely to report PSA testing compared with meat eaters (OR 0.50; 0.42, 0.60 for vegans, 0.76;  
8  
9 205 0.67, 0.86 for vegetarians and 0.79; 0.66, 0.95 for fish eaters) [10], whereas we only observed  
10  
11 206 a lower prevalence among the vegetarians but not the fish eaters (nor the vegans, perhaps  
12  
13 207 because of limited numbers) compared with meat eaters in EPIC-Oxford. However, given the  
14  
15 208 much higher rates of PSA testing in the Adventist Health Study-2 (73.3% versus 31.5% in  
16  
17 209 EPIC-Oxford), attitudes towards screening are likely to be different in the two populations,  
18  
19 210 and therefore the results might not be directly comparable.  
20  
21  
22

23 211 For medication use, a cross-sectional study in a Belgian population reported lower use of  
24  
25 212 prescribed medications when comparing vegetarians to a reference Belgian population  
26  
27 213 (25.5% versus 47.3%,  $p < 0.001$ ) [8]. While this is consistent with our findings on overall  
28  
29 214 medication use, the study did not assess the use of medications stratified by the number of  
30  
31 215 illnesses, nor did they assess appropriate medication use for specific medical conditions. No  
32  
33 216 studies were found which examined prevalence of cervical screening or HRT use among  
34  
35 217 people of different diet groups. Overall, few studies have examined health related behaviours  
36  
37 218 across habitual diet groups.  
38  
39  
40

41 219

## 44 220 **Interpretation of findings and implications**

46  
47 221 Our findings indicate differences in some health related behaviours between people of  
48  
49 222 different diet groups, although the reasons behind such differences are unclear. For the  
50  
51 223 observed differences in screening rates, possible explanations could be related to different  
52  
53 224 attitudes towards the screening programmes. In the UK, all women aged 50 to 70 are invited  
54  
55 225 to attend breast cancer screening clinics [11] and all women aged 25 to 64 are invited for  
56  
57  
58  
59  
60

1  
2  
3 226 cervical screening [12] at regular intervals. On the other hand, there is no national programme  
4  
5 227 for PSA testing, although men over the age of 50 are eligible to arrange for testing via their  
6  
7 228 GP if they wish [13]. In a small Scottish focus group study which asked participants about  
8  
9 229 their attitudes towards cancer screening (n=31 for cervical screening, n=10 for breast  
10  
11 230 screening), the study participants reported that they felt pressure from health care  
12  
13 231 professionals, family and friends to attend cervical screening, and that they also considered it  
14  
15 232 to be normative routine behaviour [14]. On the other hand, they did not report receiving much  
16  
17 233 pressure from health care professionals to attend breast screening, and also said that they felt  
18  
19 234 it was more a matter of personal choice.

20  
21  
22  
23 235 Such differences in attitudes towards breast screening and cervical screening are of interest. If  
24  
25 236 such attitudes differed by diet groups, this may help to explain the observed differences in  
26  
27 237 participation for breast screening but not cervical screening, since the latter does not appear  
28  
29 238 to involve so much personal choice. However, relevant evidence is lacking, and both dietary  
30  
31 239 and non-dietary factors which are associated with the participants' decisions to attend either  
32  
33 240 breast screening or PSA testing deserve further study. Moreover, it should also be noted that  
34  
35 241 the GP's attitude towards screening may play a role in influencing the patient's decision to  
36  
37 242 participate even when they are not directly involved with the screening process [15]. The  
38  
39 243 impact of such influences, however, requires further investigation.

40  
41  
42  
43 244 Reasons for the observed lower prevalence of HRT use and medication use among people of  
44  
45 245 different diet groups are also unclear. Given that non-meat eaters were more likely to rate  
46  
47 246 their health as good or excellent, one possible explanation is that non-meat eaters were  
48  
49 247 healthier overall and therefore less likely to require any form of treatment including HRT or  
50  
51 248 other medications. However, given the observed differences in medication use among people  
52  
53 249 with no (especially) or only one reported illness or condition, better health among non-meat  
54  
55 250 eaters is unlikely to be the only, or a sufficient explanation for the differences. Non-meat  
56  
57

1  
2  
3 251 eaters may also be reluctant to take medications which are likely to contain animal-derived  
4  
5 252 products [16], or may prefer to use homoeopathic medications [8] or other alternative  
6  
7 253 therapies.  
8  
9

10 254 Differential participation in screening for breast or prostate cancer, use of HRT, and use of  
11  
12 255 medications for people of distinct diet groups may ultimately lead to differences in disease  
13  
14 256 incidence or prognosis due to possible detection bias and differential post diagnosis  
15  
16 257 treatment. For example, given the lower rates of breast cancer screening among non-meat  
17  
18 258 eating women, it is possible that the observed incidence of breast cancer in these diet groups  
19  
20 259 underestimates the true incidence owing to detection bias, and that ultimately these women  
21  
22 260 would have a somewhat higher mortality from breast cancer. At the same time, lower  
23  
24 261 prevalence of HRT use among non-meat eating women also deserves attention given the  
25  
26 262 increase in breast cancer risk caused by HRT containing oestrogens and progestogens  
27  
28 263 [17,18]. Further study is warranted to understand why people of different diet groups have  
29  
30 264 differential participation in breast screening or prostate cancer testing, HRT use, and overall  
31  
32 265 medication use, and whether and how these differences are related to future disease risk.  
33  
34 266 Overall, our findings showed some differences in health related behaviours among people of  
35  
36 267 different diet groups, thereby highlighting the need to consider such differences when  
37  
38 268 conducting longitudinal analyses in these populations.  
39  
40  
41  
42  
43  
44  
45

269

## 270 **Strengths and limitations**

271 This study is the first to simultaneously examine prevalence of screening, HRT use and  
272 medication use in different diet groups. A strength of the study is the large sample size  
273 recruited from across different regions in the UK. Additionally, information was collected on  
274 a range of factors which may also be associated with the outcomes of interest, allowing

1  
2  
3 275 adjustment for these factors. Of potential limitations, recall bias is possible because  
4  
5 276 assessment of the exposures of interest was based on self-report, although there is no  
6  
7 277 indication that such misclassification bias should differ by diet group. Because of the  
8  
9 278 relatively small number of vegans in our study sample, the role of chance in explaining the  
10  
11 279 findings relating to this diet group cannot be ruled out. As with most population cohorts,  
12  
13 280 some degree of self-selection and healthy cohort bias may also be present.  
14  
15  
16  
17 281

## 18 19 282 **CONCLUSIONS**

20  
21  
22 283 In this population, we observed differences in breast screening, PSA testing, HRT use and  
23  
24 284 overall medication use between meat eaters, fish eaters, vegetarians and vegans, but no  
25  
26 285 significant differences between diet groups for cervical screening or medication use in people  
27  
28 286 with two or more illnesses or for specific conditions. The reasons for these differences  
29  
30 287 require further investigation. Nonetheless, such differences may be related to differential  
31  
32 288 observed morbidity or mortality from cancer and other diseases across people of different diet  
33  
34 289 groups, and therefore should be considered in future epidemiological studies.  
35  
36  
37  
38 290

## 39 40 41 291 **STATEMENTS**

### 42 43 44 292 **Acknowledgements**

45  
46  
47 293 We thank all participants in the EPIC-Oxford cohort for their invaluable contribution. The  
48  
49 294 work is supported by the UK Medical Research Council MR/M012190/1 and Cancer  
50  
51 295 Research UK 570/A16491 and C9221/A19170. KEB is supported by the Girdlers' New  
52  
53 296 Zealand Health Research Council Fellowship. TJK is a member of the Vegan Society; the  
54  
55 297 other authors had no conflicts of interest.  
56  
57  
58  
59  
60



1  
2  
3 298  
4  
56 299 **Availability of data and materials**  
78  
9 300 Data access policies for EPIC-Oxford are available via the study website (<http://www.epic-oxford.org/data-access-sharing-and-collaboration/>).  
10  
11 301  
1213  
14 302  
1516  
17 303 **Author's contributions**  
1819  
20 304 TYNT, PNA, and TJK conceived and designed the research question. TYNT and PNA  
21  
22 305 analysed the data. TYNT wrote the first draft of the manuscript, and PNA, KEB and TJK  
23  
24 306 provided input on data analysis and interpretation of results. All authors revised the  
25  
26 307 manuscript critically for important intellectual content, and read and approved the final  
27  
28 308 manuscript.  
29  
30  
31  
32  
33  
34  
35  
36  
37  
38  
39  
40  
41  
42  
43  
44  
45  
46  
47  
48  
49  
50  
51  
52  
53  
54  
55  
56  
57  
58  
59  
60

Table 1 Characteristics by diet group of participants in the EPIC-Oxford study who completed the second follow-up questionnaire (n=31260)<sup>1</sup>.

| Characteristic                                       | Meat eaters  | Fish eaters | Vegetarians | Vegans      | Total        |
|------------------------------------------------------|--------------|-------------|-------------|-------------|--------------|
| Number of participants (% female)                    | 18155 (78.2) | 5012 (81.8) | 7179 (76.3) | 914 (66.1)  | 31260 (78.0) |
| Mean (SD) age at questionnaire completion, years     | 58.9 (12.5)  | 53.8 (12.5) | 51.6 (12.7) | 50.7 (12.3) | 56.1 (13.0)  |
| Smoking status <sup>2</sup> , n (%)                  |              |             |             |             |              |
| Never smoker                                         | 10073 (55.7) | 2786 (55.6) | 4339 (60.5) | 547 (59.9)  | 17745 (56.9) |
| Former smoker                                        | 6927 (38.3)  | 1961 (39.2) | 2460 (34.3) | 330 (36.1)  | 11678 (37.5) |
| Current smoker                                       | 1094 (6.0)   | 260 (5.2)   | 367 (5.1)   | 36 (3.9)    | 1757 (5.6)   |
| Mean (SD) alcohol consumption, g/d                   | 8.7 (9.3)    | 8.2 (8.7)   | 7.6 (8.9)   | 6.7 (9.2)   | 8.3 (9.1)    |
| Self-reported current health <sup>2</sup> , n (%)    |              |             |             |             |              |
| Excellent                                            | 3713 (21.9)  | 1323 (28.1) | 1950 (28.7) | 325 (37.2)  | 7311 (24.9)  |
| Good                                                 | 9962 (58.8)  | 2688 (57.0) | 3851 (56.6) | 446 (51.0)  | 16947 (57.8) |
| Fair                                                 | 2858 (16.9)  | 612 (13.0)  | 876 (12.9)  | 80 (9.2)    | 4426 (15.1)  |
| Poor                                                 | 400 (2.4)    | 92 (2.0)    | 122 (1.8)   | 23 (2.6)    | 637 (2.2)    |
| Townsend deprivation index <sup>2</sup> , n (%)      |              |             |             |             |              |
| Richest category                                     | 4463 (27.6)  | 984 (21.8)  | 1542 (23.7) | 153 (18.3)  | 7141 (25.5)  |
| Poorest category                                     | 3438 (21.2)  | 1207 (26.8) | 1732 (26.7) | 285 (34.1)  | 6662 (23.8)  |
| In same diet group at recruitment, n (%)             | 15908 (87.7) | 3057 (61.1) | 6373 (89.1) | 573 (62.7)  | 25911 (83.0) |
| Taking medication in the past 4 weeks, n (%)         | 10196 (56.2) | 2105 (42.0) | 2829 (39.4) | 255 (27.9)  | 15385 (49.2) |
| Number of reported illnesses and conditions, n (%)   |              |             |             |             |              |
| None                                                 | 4455 (24.5)  | 1635 (32.6) | 2603 (36.3) | 344 (37.6)  | 9037 (28.9)  |
| One                                                  | 4724 (26.0)  | 1472 (29.4) | 2170 (30.2) | 291 (31.8)  | 8657 (27.7)  |
| Two                                                  | 3682 (20.3)  | 906 (18.1)  | 1261 (17.6) | 154 (16.8)  | 6003 (19.2)  |
| Three                                                | 2404 (13.2)  | 524 (10.5)  | 630 (8.8)   | 74 (8.1)    | 3632 (11.6)  |
| Four or more                                         | 2890 (15.9)  | 475 (9.5)   | 515 (7.2)   | 51 (5.6)    | 3931 (12.6)  |
| Reported high blood pressure <sup>2</sup> , n (%)    | 4397 (29.2)  | 686 (16.2)  | 944 (15.2)  | 85 (10.6)   | 6112 (23.2)  |
| and taking appropriate medication, n (%)             | 2573 (58.5)  | 357 (52.0)  | 430 (45.6)  | 40 (47.1)   | 3400 (55.6)  |
| Reported high blood cholesterol <sup>2</sup> , n (%) | 3351 (23.1)  | 561 (13.5)  | 645 (10.5)  | 44 (5.5)    | 4601 (18.0)  |
| and taking appropriate medication, n (%)             | 1646 (49.1)  | 209 (37.3)  | 243 (37.7)  | 14 (31.8)   | 2112 (45.9)  |
| Reported asthma <sup>2</sup> , n (%)                 | 1885 (13.6)  | 496 (12.1)  | 758 (12.4)  | 88 (11.1)   | 3227 (12.9)  |
| and taking appropriate medication, n (%)             | 737 (39.1)   | 169 (34.1)  | 246 (32.5)  | 17 (19.3)   | 1169 (36.2)  |
| Reported diabetes <sup>2</sup> , n (%)               | 707 (5.2)    | 75 (1.9)    | 119 (2.0)   | 7 (0.9)     | 908 (3.7)    |
| and taking appropriate medication, n (%)             | 446 (63.1)   | 41 (54.7)   | 84 (70.6)   | 6 (85.7)    | 577 (63.5)   |
| Reported thyroid disease <sup>2</sup> , n (%)        | 1545 (11.1)  | 380 (9.2)   | 465 (7.6)   | 56 (7.1)    | 2446 (9.8)   |
| and taking appropriate medication, n (%)             | 1191 (77.1)  | 273 (71.8)  | 337 (72.5)  | 37 (66.1)   | 1838 (75.1)  |

1. Based on participant characteristics at the time of the second follow-up questionnaire (completed approximately 10 years from baseline, around 2007).

2. Unknown for some participants.

Table 2 Participation in screening by diet group of women and men in the EPIC-Oxford study.

| Screening/Diet group                                 | Number answering the relevant question | Number (%) answering in the affirmative | Prevalence ratio (95% CI) <sup>1</sup> |
|------------------------------------------------------|----------------------------------------|-----------------------------------------|----------------------------------------|
| <b>Breast screening<sup>2</sup></b>                  |                                        |                                         |                                        |
| Meat eaters                                          | 9239                                   | 8813 (95.4)                             | 1.00 (ref)                             |
| Fish eaters                                          | 2143                                   | 1928 (90.0)                             | 0.96 (0.92,1.01)                       |
| Vegetarians                                          | 2395                                   | 2078 (86.8)                             | 0.94 (0.89,0.98)                       |
| Vegans                                               | 239                                    | 182 (76.2)                              | 0.82 (0.71,0.95)                       |
|                                                      |                                        |                                         | <i>P-het=0.004</i>                     |
| <b>Cervical screening<sup>3</sup></b>                |                                        |                                         |                                        |
| Meat eaters                                          | 15936                                  | 15365 (96.4)                            | 1.00 (ref)                             |
| Fish eaters                                          | 4513                                   | 4369 (96.8)                             | 1.00 (0.97,1.03)                       |
| Vegetarians                                          | 6574                                   | 6268 (95.3)                             | 0.98 (0.95,1.01)                       |
| Vegans                                               | 758                                    | 691 (91.2)                              | 0.94 (0.87,1.02)                       |
|                                                      |                                        |                                         | <i>P-het=0.37</i>                      |
| <b>Prostate specific antigen testing<sup>4</sup></b> |                                        |                                         |                                        |
| Meat eaters                                          | 3078                                   | 1066 (34.6)                             | 1.00 (ref)                             |
| Fish eaters                                          | 594                                    | 181 (30.5)                              | 0.99 (0.85,1.17)                       |
| Vegetarians                                          | 947                                    | 228 (24.1)                              | 0.82 (0.71,0.96)                       |
| Vegans                                               | 164                                    | 33 (20.1)                               | 0.72 (0.50,1.02)                       |
|                                                      |                                        |                                         | <i>P-het=0.023</i>                     |

- All analyses adjusted for age at follow-up (<40, 40-44, 45-49, 50-54, 55-59, 60-64, 65-69, 70-74, ≥75 years, as appropriate according to the age range of included participants), region of residence (eight regions), and self-reported current health (excellent, good, fair, poor, unknown).
- Included women aged 50 to 74 who answered the relevant question on the second (10 year) follow-up questionnaire.
- Included women aged 25 to 74 who answered the relevant question on the first (5 year) follow-up questionnaire.
- Included men aged 50 to 84 who answered the relevant question on the second (10 year) follow-up questionnaire.

Table 3 Use of hormone replacement therapy by diet group of women in the EPIC-Oxford study.

| Diet group  | Number answering the relevant question | Number (%) answering in the affirmative | Prevalence ratio (95% CI) <sup>1</sup> |
|-------------|----------------------------------------|-----------------------------------------|----------------------------------------|
| Meat eaters | 6911                                   | 3098 (44.8)                             | 1.00 (ref)                             |
| Fish eaters | 1614                                   | 541 (33.5)                              | 0.80 (0.73,0.88)                       |
| Vegetarians | 1778                                   | 541 (30.4)                              | 0.74 (0.68,0.81)                       |
| Vegans      | 188                                    | 31 (16.5)                               | 0.42 (0.30,0.60)                       |
|             |                                        |                                         | <i>P-het&lt;0.0001</i>                 |

- Adjusted for age at follow-up (50-54, 55-59, 60-64, 65-69, 70-74 years), region of residence (eight regions), and self-reported current health (excellent, good, fair, poor, unknown). Included post-menopausal women aged 50 to 74 who answered the relevant question on the second (10 year) follow-up questionnaire.

Table 4 Medication use by number of self-reported illnesses or conditions and diet group of participants in the EPIC-Oxford study.<sup>1</sup>

| Number of self-reported illnesses or conditions / Diet group | Number of participants | Percentage taking any medication | Prevalence ratio (95% CI) <sup>2</sup> |
|--------------------------------------------------------------|------------------------|----------------------------------|----------------------------------------|
| <b>Any number<sup>3</sup></b>                                |                        |                                  |                                        |
| Meat eaters                                                  | 18155                  | 56.2                             | 1.00 (ref)                             |
| Fish eaters                                                  | 5012                   | 42.0                             | 0.92 (0.87-0.96)                       |
| Vegetarians                                                  | 7179                   | 39.4                             | 0.93 (0.89-0.98)                       |
| Vegans                                                       | 914                    | 27.9                             | 0.71 (0.63-0.81)                       |
|                                                              |                        |                                  | <i>P-het</i> <0.0001                   |
| <b>None</b>                                                  |                        |                                  |                                        |
| Meat eaters                                                  | 4455                   | 16.9                             | 1.00 (ref)                             |
| Fish eaters                                                  | 1635                   | 11.9                             | 0.80 (0.68-0.94)                       |
| Vegetarians                                                  | 2603                   | 11.5                             | 0.80 (0.70-0.92)                       |
| Vegans                                                       | 344                    | 6.1                              | 0.47 (0.30-0.72)                       |
|                                                              |                        |                                  | <i>P-het</i> <0.0001                   |
| <b>One</b>                                                   |                        |                                  |                                        |
| Meat eaters                                                  | 4724                   | 48.9                             | 1.00 (ref)                             |
| Fish eaters                                                  | 1472                   | 39.1                             | 0.87 (0.80-0.96)                       |
| Vegetarians                                                  | 2170                   | 40.5                             | 0.91 (0.84-0.99)                       |
| Vegans                                                       | 291                    | 29.2                             | 0.69 (0.55-0.85)                       |
|                                                              |                        |                                  | <i>P-het</i> =0.0002                   |
| <b>Two</b>                                                   |                        |                                  |                                        |
| Meat eaters                                                  | 3682                   | 66.9                             | 1.00 (ref)                             |
| Fish eaters                                                  | 906                    | 58.8                             | 0.94 (0.86-1.04)                       |
| Vegetarians                                                  | 1261                   | 58.1                             | 0.97 (0.89-1.06)                       |
| Vegans                                                       | 154                    | 42.2                             | 0.74 (0.58-0.95)                       |
|                                                              |                        |                                  | <i>P-het</i> =0.082                    |
| <b>Three</b>                                                 |                        |                                  |                                        |
| Meat eaters                                                  | 2404                   | 82.6                             | 1.00 (ref)                             |
| Fish eaters                                                  | 524                    | 74.0                             | 0.94 (0.84-1.05)                       |
| Vegetarians                                                  | 630                    | 73.0                             | 0.94 (0.84-1.04)                       |
| Vegans                                                       | 74                     | 59.5                             | 0.78 (0.57-1.05)                       |
|                                                              |                        |                                  | <i>P-het</i> =0.22                     |
| <b>Four or more</b>                                          |                        |                                  |                                        |
| Meat eaters                                                  | 2890                   | 93.0                             | 1.00 (ref)                             |
| Fish eaters                                                  | 475                    | 86.9                             | 0.96 (0.86-1.06)                       |
| Vegetarians                                                  | 515                    | 88.9                             | 0.98 (0.89-1.09)                       |
| Vegans                                                       | 51                     | 78.4                             | 0.87 (0.63-1.19)                       |
|                                                              |                        |                                  | <i>P-het</i> =0.70                     |

1. Refers to medication use for most of the past four weeks on the second (10 year) follow-up questionnaire, excluding HRT and contraceptive pills.
2. Adjusted for the cross-classification of sex and age at follow-up (<40, 40-44, 45-49, 50-54, 55-59, 60-64, 65-69, 70-74, ≥75 years), region of residence (eight regions), and self-reported current health (excellent, good, fair, poor, unknown).
3. Further adjusted for the number of self-reported illnesses or conditions (0, 1, 2, 3, ≥4).

Table 5 Medication use for specific conditions by diet group of participants in the EPIC-Oxford study.<sup>1</sup>

| Condition/ Diet group                     | Number reporting the condition (mean years since reported diagnosis) | Number (%) taking appropriate medication | Prevalence ratio (95% CI) <sup>2</sup> |
|-------------------------------------------|----------------------------------------------------------------------|------------------------------------------|----------------------------------------|
| <b>High blood pressure<sup>3</sup></b>    |                                                                      |                                          |                                        |
| Meat eaters                               | 4397 (9.8)                                                           | 2573 (58.5)                              | 1.00 (ref)                             |
| Fish eaters                               | 686 (9.3)                                                            | 357 (52.0)                               | 0.97 (0.86-1.08)                       |
| Vegetarians                               | 944 (9.0)                                                            | 430 (45.6)                               | 0.91 (0.82-1.01)                       |
| Vegans                                    | 85 (9.0)                                                             | 40 (47.1)                                | 0.92 (0.67-1.26)                       |
|                                           |                                                                      |                                          | <i>P-het=0.37</i>                      |
| <b>High blood cholesterol<sup>4</sup></b> |                                                                      |                                          |                                        |
| Meat eaters                               | 3351 (6.3)                                                           | 1646 (49.1)                              | 1.00 (ref)                             |
| Fish eaters                               | 561 (5.3)                                                            | 209 (37.3)                               | 0.88 (0.76-1.01)                       |
| Vegetarians                               | 645 (5.5)                                                            | 243 (37.7)                               | 0.94 (0.81-1.08)                       |
| Vegans                                    | 44 (7.1)                                                             | 14 (31.8)                                | 0.74 (0.44-1.26)                       |
|                                           |                                                                      |                                          | <i>P-het=0.20</i>                      |
| <b>Asthma<sup>5</sup></b>                 |                                                                      |                                          |                                        |
| Meat eaters                               | 1885 (25.3)                                                          | 737 (39.1)                               | 1.00 (ref)                             |
| Fish eaters                               | 496 (23.2)                                                           | 169 (34.1)                               | 0.98 (0.82-1.17)                       |
| Vegetarians                               | 758 (23.4)                                                           | 246 (32.5)                               | 0.97 (0.84-1.14)                       |
| Vegans                                    | 88 (27.9)                                                            | 17 (19.3)                                | 0.67 (0.41-1.09)                       |
|                                           |                                                                      |                                          | <i>P-het=0.45</i>                      |
| <b>Diabetes<sup>6</sup></b>               |                                                                      |                                          |                                        |
| Meat eaters                               | 707 (10.0)                                                           | 446 (63.1)                               | 1.00 (ref)                             |
| Fish eaters                               | 75 (14.8)                                                            | 41 (54.7)                                | 0.78 (0.56-1.08)                       |
| Vegetarians                               | 119 (10.6)                                                           | 84 (70.6)                                | 1.05 (0.81-1.35)                       |
| Vegans                                    | 7 (13.2)                                                             | 6 (85.7)                                 | 1.07 (0.45-2.51)                       |
|                                           |                                                                      |                                          | <i>P-het=0.46</i>                      |
| <b>Thyroid disease<sup>7</sup></b>        |                                                                      |                                          |                                        |
| Meat eaters                               | 1545 (13.2)                                                          | 1191 (77.1)                              | 1.00 (ref)                             |
| Fish eaters                               | 380 (11.6)                                                           | 273 (71.8)                               | 0.95 (0.83-1.09)                       |
| Vegetarians                               | 465 (11.2)                                                           | 337 (72.5)                               | 0.97 (0.85-1.10)                       |
| Vegans                                    | 56 (11.8)                                                            | 37 (66.1)                                | 0.88 (0.63-1.22)                       |
|                                           |                                                                      |                                          | <i>P-het=0.78</i>                      |

- Refers to medication use for most the past four weeks specific to the condition described, among participants who reported diagnosis for the condition on the second (10 year) follow-up questionnaire.
- Adjusted for the cross-classification of sex and age at follow-up (<40, 40-44, 45-49, 50-54, 55-59, 60-64, 65-69, 70-74, ≥75 years), region of residence (eight regions), self-reported current health (excellent, good, fair, poor, unknown), years since reported diagnosis (calculated as year of follow-up questionnaire completion minus reported year of diagnosis; <2, 2-3, 4-5, 6-9, ≥10 years, unknown), and number of self-reported illnesses or conditions (1, 2, 3, ≥4).
- Reported use of at least one of amlodipine, enalapril, frusemide, propranolol, atenolol, bendrofluazide, lisinopril and nifedipine.
- Reported use of at least one of atorvastatin and simvastatin.
- Reported use of at least one of beclomethasone and salbutamol.
- Reported use of at least one of insulin and metformin.
- Reported use of thyroxine.

1  
2  
3 **1 REFERENCES**  
4

- 5  
6 1 Davey GK, Spencer EA, Appleby PN, *et al.* EPIC-Oxford: lifestyle characteristics and  
7  
8 3 nutrient intakes in a cohort of 33 883 meat-eaters and 31 546 non meat-eaters in the  
9  
10 4 UK. *Public Health Nutr* 2003;**6**:259–68. doi:10.1079/PHN2002430  
11  
12  
13 5 2 Appleby PN, Davey GK, Key TJ. Hypertension and blood pressure among meat eaters,  
14  
15 6 fish eaters, vegetarians and vegans in EPIC-Oxford. *Public Health Nutr* 2002;**5**:645–  
16  
17 7 54. doi:10.1079/PHN2002332  
18  
19  
20 8 3 Wang F, Zheng J, Yang B, *et al.* Effects of Vegetarian Diets on Blood Lipids: A  
21  
22 9 Systematic Review and Meta-Analysis of Randomized Controlled Trials. *J Am Heart*  
23  
24 10 *Assoc* 2015;**4**:e002408. doi:10.1161/JAHA.115.002408  
25  
26  
27 11 4 Key TJ, Appleby PN, Crowe FL, *et al.* Cancer in British vegetarians: Updated analyses  
28  
29 12 of 4998 incident cancers in a cohort of 32,491 meat eaters, 8612 fish eaters, 18,298  
30  
31 13 vegetarians, and 2246 vegans. *Am J Clin Nutr* 2014;**100**:378–85.  
32  
33 14 doi:10.3945/ajcn.113.071266  
34  
35  
36  
37 15 5 Tantamango-Bartley Y, Jaceldo-Siegl K, Fan J, *et al.* Vegetarian Diets and the  
38  
39 16 Incidence of Cancer in a Low-risk Population. *Cancer Epidemiol Biomarkers Prev*  
40  
41 17 2013;**22**:286–94. doi:10.1158/1055-9965.EPI-12-1060  
42  
43  
44 18 6 Crowe FL, Appleby PN, Travis RC, *et al.* Risk of hospitalization or death from  
45  
46 19 ischemic heart disease among British vegetarians and nonvegetarians: results from the  
47  
48 20 EPIC-Oxford cohort study. *Am J Clin Nutr* 2013;**97**:597–603.  
49  
50 21 doi:10.3945/ajcn.112.044073  
51  
52  
53 22 7 Appleby PN, Crowe FL, Bradbury KE, *et al.* Mortality in vegetarians and comparable  
54  
55 23 nonvegetarians in the United Kingdom. *Am J Clin Nutr* 2016;**103**:218–30.  
56  
57  
58  
59  
60

- 1  
2  
3 24 doi:10.3945/ajcn.115.119461  
4  
5  
6 25 8 Alewaeters K, Clarys P, Hebbelinck M, *et al.* Cross-sectional analysis of BMI and  
7  
8 26 some lifestyle variables in Flemish vegetarians compared with non-vegetarians.  
9  
10 27 *Ergonomics* 2005;**48**:1433–44. doi:10.1080/00140130500101031  
11  
12  
13 28 9 Lagerlund M, Drake I, Wirfält E, *et al.* Health-related lifestyle factors and  
14  
15 29 mammography screening attendance in a Swedish cohort study. *Eur J Cancer Prev*  
16  
17 30 2015;**24**:44–50. doi:10.1097/CEJ.0000000000000025  
18  
19  
20 31 10 Ibrayev Y, Oda K, Fraser GE, *et al.* Utilization of prostate cancer screening according  
21  
22 32 to dietary patterns and other demographic variables. The adventist health study-2. *J*  
23  
24 33 *Cancer* 2013;**4**:416–26. doi:10.7150/jca.6442  
25  
26  
27 34 11 National Health Service. NHS Choices: Breast cancer screening.  
28  
29 35 2015.<http://www.nhs.uk/conditions/breast-cancer-screening/Pages/Introduction.aspx>  
30  
31 36 (accessed 27 Feb2017).  
32  
33  
34 37 12 National Health Service. NHS Choices: Cervical screening.  
35  
36 38 2015.[http://www.nhs.uk/Conditions/Cervical-screening-](http://www.nhs.uk/Conditions/Cervical-screening-test/Pages/Introduction.aspx#main-navigation)  
37  
38 39 [test/Pages/Introduction.aspx#main-navigation](http://www.nhs.uk/Conditions/Cervical-screening-test/Pages/Introduction.aspx#main-navigation) (accessed 27 Feb2017).  
39  
40  
41 42 13 National Health Service. NHS Choices: Prostate Cancer -PSA testing.  
42  
43 44 2015.<http://www.nhs.uk/Conditions/Cancer-of-the-prostate/Pages/Prevention.aspx>  
44  
45 46 (accessed 27 Feb2017).  
46  
47  
48  
49 43 14 Jepson RG, Hewison J, Thompson A, *et al.* Patient perspectives on information and  
50  
51 44 choice in cancer screening: A qualitative study in the UK. *Soc Sci Med* 2007;**65**:890–9.  
52  
53 45 doi:10.1016/j.socscimed.2007.04.009  
54  
55  
56  
57  
58  
59  
60

- 1  
2  
3 46 15 Jensen LF, Mukai TO, Andersen B, *et al.* The association between general  
4  
5 47 practitioners' attitudes towards breast cancer screening and women's screening  
6  
7 48 participation. *BMC Cancer* 2012;**12**:254. doi:10.1186/1471-2407-12-254  
8  
9  
10 49 16 Tatham KC, Patel KP. Suitability of common drugs for patients who avoid animal  
11  
12 50 products. *BMJ* 2014;**348**:g401. doi:10.1136/bmj.g401  
13  
14  
15 51 17 Beral V, Banks E, Bull D, *et al.* Breast cancer and hormone replacement therapy in the  
16  
17 52 Million Women Study. *Lancet* 2003;**362**:419–27. doi:10.1080/13697130400014698  
18  
19  
20 53 18 Rossouw JE, Anderson GL, Prentice RL, *et al.* Risks and benefits of estrogen plus  
21  
22 54 progestin in healthy postmenopausal women: principal results From the Women's  
23  
24 55 Health Initiative randomized controlled trial. *JAMA* 2002;**288**:321–  
25  
26 56 33.<http://www.ncbi.nlm.nih.gov/pubmed/12117397>  
27  
28  
29  
30 57  
31  
32  
33 58  
34  
35  
36  
37  
38  
39  
40  
41  
42  
43  
44  
45  
46  
47  
48  
49  
50  
51  
52  
53  
54  
55  
56  
57  
58  
59  
60



## STROBE Statement—checklist of items that should be included in reports of observational studies

|                              | Item No | Recommendation                                                                                                                                                                                                                                                                                                                                                                                                                                                                                                                                                                                                                                                                                                                   |
|------------------------------|---------|----------------------------------------------------------------------------------------------------------------------------------------------------------------------------------------------------------------------------------------------------------------------------------------------------------------------------------------------------------------------------------------------------------------------------------------------------------------------------------------------------------------------------------------------------------------------------------------------------------------------------------------------------------------------------------------------------------------------------------|
| <b>Title and abstract</b>    | 1       | (a) Indicate the study's design with a commonly used term in the title or the abstract <a href="#">P.1</a><br>(b) Provide in the abstract an informative and balanced summary of what was done and what was found <a href="#">P.2</a>                                                                                                                                                                                                                                                                                                                                                                                                                                                                                            |
| <b>Introduction</b>          |         |                                                                                                                                                                                                                                                                                                                                                                                                                                                                                                                                                                                                                                                                                                                                  |
| Background/rationale         | 2       | Explain the scientific background and rationale for the investigation being reported <a href="#">P.4</a>                                                                                                                                                                                                                                                                                                                                                                                                                                                                                                                                                                                                                         |
| Objectives                   | 3       | State specific objectives, including any prespecified hypotheses <a href="#">P.5 Lines 66-68</a>                                                                                                                                                                                                                                                                                                                                                                                                                                                                                                                                                                                                                                 |
| <b>Methods</b>               |         |                                                                                                                                                                                                                                                                                                                                                                                                                                                                                                                                                                                                                                                                                                                                  |
| Study design                 | 4       | Present key elements of study design early in the paper <a href="#">P.5 Lines 72, P.7 Lines 114-116</a>                                                                                                                                                                                                                                                                                                                                                                                                                                                                                                                                                                                                                          |
| Setting                      | 5       | Describe the setting, locations, and relevant dates, including periods of recruitment, exposure, follow-up, and data collection <a href="#">P.5-7 Lines 71-111</a>                                                                                                                                                                                                                                                                                                                                                                                                                                                                                                                                                               |
| Participants                 | 6       | (a) <i>Cohort study</i> —Give the eligibility criteria, and the sources and methods of selection of participants. Describe methods of follow-up<br><i>Case-control study</i> —Give the eligibility criteria, and the sources and methods of case ascertainment and control selection. Give the rationale for the choice of cases and controls<br><i>Cross-sectional study</i> —Give the eligibility criteria, and the sources and methods of selection of participants <a href="#">P.5 Lines 75-79</a><br>(b) <i>Cohort study</i> —For matched studies, give matching criteria and number of exposed and unexposed<br><i>Case-control study</i> —For matched studies, give matching criteria and the number of controls per case |
| Variables                    | 7       | Clearly define all outcomes, exposures, predictors, potential confounders, and effect modifiers. Give diagnostic criteria, if applicable <a href="#">P.6-8 Lines 87-111, 129-131, 134-136, 140-142</a>                                                                                                                                                                                                                                                                                                                                                                                                                                                                                                                           |
| Data sources/<br>measurement | 8*      | For each variable of interest, give sources of data and details of methods of assessment (measurement). Describe comparability of assessment methods if there is more than one group <a href="#">P.5-7 Lines 75-111</a>                                                                                                                                                                                                                                                                                                                                                                                                                                                                                                          |
| Bias                         | 9       | Describe any efforts to address potential sources of bias <a href="#">P.7 Lines 119-124</a>                                                                                                                                                                                                                                                                                                                                                                                                                                                                                                                                                                                                                                      |
| Study size                   | 10      | Explain how the study size was arrived at <a href="#">P.5 Lines 76-79, P.7 Lines 117-119</a>                                                                                                                                                                                                                                                                                                                                                                                                                                                                                                                                                                                                                                     |
| Quantitative variables       | 11      | Explain how quantitative variables were handled in the analyses. If applicable, describe which groupings were chosen and why <a href="#">P.7-8 Lines 129-131, 134-136, 140-142</a>                                                                                                                                                                                                                                                                                                                                                                                                                                                                                                                                               |
| Statistical methods          | 12      | (a) Describe all statistical methods, including those used to control for confounding <a href="#">P.7-8 Lines 114-146</a><br>(b) Describe any methods used to examine subgroups and interactions <a href="#">P.8 Lines 143-144</a><br>(c) Explain how missing data were addressed <a href="#">P.7-9 Lines 132, 142</a><br>(d) <i>Cohort study</i> —If applicable, explain how loss to follow-up was addressed<br><i>Case-control study</i> —If applicable, explain how matching of cases and controls was addressed                                                                                                                                                                                                              |

1  
2 *Cross-sectional study*—If applicable, describe analytical methods taking account of  
3 sampling strategy P.7 Lines 114-116

---

(e) Describe any sensitivity analyses P.8 Lines 143-145

4  
5 Continued on next page  
6  
7  
8  
9  
10  
11  
12  
13  
14  
15  
16  
17  
18  
19  
20  
21  
22  
23  
24  
25  
26  
27  
28  
29  
30  
31  
32  
33  
34  
35  
36  
37  
38  
39  
40  
41  
42  
43  
44  
45  
46  
47  
48  
49  
50  
51  
52  
53  
54  
55  
56  
57  
58  
59  
60

For peer review only

**Results**

|                  |     |                                                                                                                                                                                                                                                                                                                                                                                                                                                               |
|------------------|-----|---------------------------------------------------------------------------------------------------------------------------------------------------------------------------------------------------------------------------------------------------------------------------------------------------------------------------------------------------------------------------------------------------------------------------------------------------------------|
| Participants     | 13* | (a) Report numbers of individuals at each stage of study—eg numbers potentially eligible, examined for eligibility, confirmed eligible, included in the study, completing follow-up, and analysed <a href="#">P.8-9 Lines 150-153, 159-160</a><br>(b) Give reasons for non-participation at each stage <a href="#">P.8 Lines 150-151</a><br>(c) Consider use of a flow diagram                                                                                |
| Descriptive data | 14* | (a) Give characteristics of study participants (eg demographic, clinical, social) and information on exposures and potential confounders <a href="#">P.8-9 Lines 150-156</a><br>(b) Indicate number of participants with missing data for each variable of interest <a href="#">P.8-9 Lines 150-153, 159-160</a><br>(c) <i>Cohort study</i> —Summarise follow-up time (eg, average and total amount)                                                          |
| Outcome data     | 15* | <i>Cohort study</i> —Report numbers of outcome events or summary measures over time<br><i>Case-control study</i> —Report numbers in each exposure category, or summary measures of exposure<br><i>Cross-sectional study</i> —Report numbers of outcome events or summary measures <a href="#">P.17-19</a>                                                                                                                                                     |
| Main results     | 16  | (a) Give unadjusted estimates and, if applicable, confounder-adjusted estimates and their precision (eg, 95% confidence interval). Make clear which confounders were adjusted for and why they were included <a href="#">P.17-19</a><br>(b) Report category boundaries when continuous variables were categorized <a href="#">P.17-19</a><br>(c) If relevant, consider translating estimates of relative risk into absolute risk for a meaningful time period |
| Other analyses   | 17  | Report other analyses done—eg analyses of subgroups and interactions, and sensitivity analyses <a href="#">P.10 Lines 179-182</a>                                                                                                                                                                                                                                                                                                                             |

**Discussion**

|                  |    |                                                                                                                                                                                                    |
|------------------|----|----------------------------------------------------------------------------------------------------------------------------------------------------------------------------------------------------|
| Key results      | 18 | Summarise key results with reference to study objectives <a href="#">P.10 Lines 185-194</a>                                                                                                        |
| Limitations      | 19 | Discuss limitations of the study, taking into account sources of potential bias or imprecision. Discuss both direction and magnitude of any potential bias <a href="#">P.14 Lines 275-280</a>      |
| Interpretation   | 20 | Give a cautious overall interpretation of results considering objectives, limitations, multiplicity of analyses, results from similar studies, and other relevant evidence <a href="#">P.10-14</a> |
| Generalisability | 21 | Discuss the generalisability (external validity) of the study results <a href="#">P.10-14</a>                                                                                                      |

**Other information**

|         |    |                                                                                                                                                                                                    |
|---------|----|----------------------------------------------------------------------------------------------------------------------------------------------------------------------------------------------------|
| Funding | 22 | Give the source of funding and the role of the funders for the present study and, if applicable, for the original study on which the present article is based ) <a href="#">P.14 Lines 294-296</a> |
|---------|----|----------------------------------------------------------------------------------------------------------------------------------------------------------------------------------------------------|

\*Give information separately for cases and controls in case-control studies and, if applicable, for exposed and unexposed groups in cohort and cross-sectional studies.

**Note:** An Explanation and Elaboration article discusses each checklist item and gives methodological background and published examples of transparent reporting. The STROBE checklist is best used in conjunction with this article (freely available on the Web sites of PLoS Medicine at <http://www.plosmedicine.org/>, Annals of Internal Medicine at <http://www.annals.org/>, and Epidemiology at <http://www.epidem.com/>). Information on the STROBE Initiative is available at [www.strobe-statement.org](http://www.strobe-statement.org).

# BMJ Open

## Cross-sectional analyses of participation in cancer screening and use of hormone replacement therapy and medications in meat eaters and vegetarians: the EPIC-Oxford study.

|                                 |                                                                                                                                                                                                                                               |
|---------------------------------|-----------------------------------------------------------------------------------------------------------------------------------------------------------------------------------------------------------------------------------------------|
| Journal:                        | <i>BMJ Open</i>                                                                                                                                                                                                                               |
| Manuscript ID                   | bmjopen-2017-018245.R1                                                                                                                                                                                                                        |
| Article Type:                   | Research                                                                                                                                                                                                                                      |
| Date Submitted by the Author:   | 19-Oct-2017                                                                                                                                                                                                                                   |
| Complete List of Authors:       | Tong, Tammy Yin Ni; Cancer Epidemiology Unit, Appleby, P; Cancer Epidemiology Unit, University of Oxford<br>Bradbury, Kathryn; Cancer Epidemiology Unit, University of Oxford<br>Key, Timothy; Cancer Epidemiology Unit, University of Oxford |
| <b>Primary Subject Heading</b>: | Epidemiology                                                                                                                                                                                                                                  |
| Secondary Subject Heading:      | Nutrition and metabolism, Oncology                                                                                                                                                                                                            |
| Keywords:                       | NUTRITION & DIETETICS, ONCOLOGY, HEALTH SERVICES<br>ADMINISTRATION & MANAGEMENT                                                                                                                                                               |
|                                 |                                                                                                                                                                                                                                               |

SCHOLARONE™  
Manuscripts

1  
2  
3 1 **Cross-sectional analyses of participation in cancer screening and use of hormone**  
4  
5 2 **replacement therapy and medications in meat eaters and vegetarians: the EPIC-Oxford**  
6  
7 3 **study.**  
8  
9

10 4 Tammy Y.N. Tong<sup>1</sup>, Paul N. Appleby<sup>1</sup>, Kathryn E. Bradbury<sup>1</sup>, Timothy J. Key<sup>1</sup>  
11  
12  
13 5

14  
15  
16 6 1. Cancer Epidemiology Unit, Nuffield Department of Population Health, University of  
17  
18 7 Oxford, UK  
19  
20  
21 8

22  
23  
24 9 Corresponding author: Tammy Y.N. Tong  
25  
26

27 10 Postal address: Cancer Epidemiology Unit, University of Oxford, Richard Doll Building, Old  
28  
29 11 Road Campus, Oxford, OX3 7LF  
30  
31

32 12 Tel: +44 (0) 1865 289653  
33  
34

35 13 Email: tammy.tong@ceu.ox.ac.uk  
36  
37

38 14  
39  
40

41 15 Word count: 3599 words  
42  
43

44 16  
45  
46

47 17 Keywords: vegetarians; cancer screening; hormone replacement therapy; medication use  
48  
49  
50  
51  
52  
53  
54  
55  
56  
57

1  
2  
3 18 **ABSTRACT**  
4  
5

6 19 **Objectives:** To examine differences in health-related behaviours such as screening or testing  
7  
8 20 for cancer, use of hormone replacement therapy (HRT), and use of other medications in  
9  
10 21 different diet groups.

11  
12  
13 22 **Design:** We studied 31,260 participants across four diet groups (18,155 meat eaters, 5,012  
14  
15 23 fish eaters, 7,179 vegetarians, 914 vegans) in the UK EPIC-Oxford cohort. Information was  
16  
17 24 collected in 5 (around 2000-2003) or 10 (around 2007) year follow-up questionnaires  
18  
19 25 regarding participation in breast screening, cervical screening, prostate specific antigen (PSA)  
20  
21 26 testing, use of HRT, and use of medications for the past four weeks. Using Poisson  
22  
23 27 regression, we estimated the prevalence ratios (PR) for each behaviour across people of  
24  
25 28 different diet groups, using meat-eaters as the reference group.

26  
27  
28  
29 29 **Results:** Compared with meat-eaters, vegetarian (PR; 95% confidence interval: 0.94; 0.89,  
30  
31 30 0.98) and vegan (0.82; 0.71, 0.95) women reported lower participation in breast screening,  
32  
33 31 and vegetarian men were less likely to report PSA testing (0.82; 0.71, 0.96). No differences  
34  
35 32 were observed among women for cervical screening. In women, all non-meat eating groups  
36  
37 33 reported lower use of HRT compared with meat-eaters ( $p$  heterogeneity<0.0001). Lower  
38  
39 34 reported use of any medication was observed for participants in all non-meat eating groups  
40  
41 35 with no ( $p$ <0.0001) or one ( $p$ =0.0002) self-reported illness. No heterogeneity was observed  
42  
43 36 across the diet groups for the reported use of specific medication for high blood pressure,  
44  
45 37 high blood cholesterol, asthma, diabetes, and thyroid disease.

46  
47  
48  
49 38 **Conclusions:** Differences in self-reported breast screening, PSA testing, HRT use and overall  
50  
51 39 medication use were observed across the diet groups. Whether such differences contribute to  
52  
53 40 differential long-term disease risks requires further study.  
54  
55  
56  
57  
58  
59  
60

**Strengths and limitations of this study**

- This study is the first to simultaneously examine the reported uptake of breast and cervical cancer screening, prostate specific antigen testing, hormone replacement therapy (HRT) use and medication use in different diet groups.
- The study includes a large number of participants recruited from across different regions in the United Kingdom, with a high proportion of fish eaters, vegetarians, and vegans.
- Recall bias is possible because assessment of cancer screening or testing, HRT use and medication use was based on self-report, although there is no indication that such misclassification bias should differ by diet group.
- The study is cross-sectional and we cannot infer causality.

41

## 42 INTRODUCTION

43 People of different habitual diet groups have been shown to have different health  
44 characteristics. Compared to meat eaters, vegetarians generally have lower BMI, blood  
45 pressure, and circulating low density lipoprotein cholesterol levels [1–3], characteristics  
46 likely to reduce disease risk. However, evidence on the long-term risk of many non-  
47 communicable diseases across people of different diet groups is limited.

48 For cancer risk, both a United Kingdom (UK) [4] and a United States (US) [5] study reported  
49 lower risk of overall cancer incidence with a vegetarian diet. Because health related  
50 behaviours, such as participation in cancer screening [6] or use of hormone replacement  
51 therapy (HRT) [7,8], may contribute to the observed rates of cancer, the presence of any  
52 differences in these behaviours between diet groups in different populations deserve further  
53 investigation. Results from a Swedish cohort [9] and a US cohort [10] showed that  
54 vegetarians (including vegans and people who ate fish but not meat) had lower odds of  
55 attending breast screening and prostate cancer screening respectively, when compared with  
56 meat eaters, and vegetarians also had lower use of HRT compared with non-vegetarians [5].

57 For cardiovascular diseases, vegetarians in EPIC-Oxford have been observed to have lower  
58 ischaemic heart disease risk (hospitalization and death combined) [11], but no significant  
59 difference in ischaemic heart disease mortality was observed between diet groups in the same  
60 population [12]. The reason for this apparent difference between incidence and mortality is  
61 unclear. One possible explanation could be the differential use of appropriate medications in  
62 the different diet groups, which subsequently influences disease mortality. In a Belgian  
63 population for example, vegetarians had lower use of prescription medications compared to  
64 non-vegetarians, but similar use of non-prescription drugs [13].



1  
2  
3 65 The increasing popularity and interest in vegetarian diets [14] prompts research on the long-  
4  
5 66 term health of vegetarians and vegans. Because health behaviour such as screening or  
6  
7 67 medication use may ultimately influence disease risk, the understanding of any differences in  
8  
9 68 these behaviours by diet group is crucial for the appropriate appraisal of possible differences  
10  
11 69 in disease risk between diet groups. However, current knowledge on this topic is insufficient,  
12  
13 70 because literature on participation in screening and use of medication across people of  
14  
15 71 different diet groups is scarce. Therefore, the aim of this study was to assess some of these  
16  
17 72 relevant health behaviours, including participation in cancer screening or testing, and use of  
18  
19 73 HRT and other medications among people of different diet groups, in a large population-  
20  
21 74 based cohort in the UK with a high percentage of vegetarians.  
22  
23  
24  
25  
26  
27

## 28 76 **METHODS**

### 31 77 **Study population**

34 78 The EPIC-Oxford study is a UK based cohort recruited between 1993 and 1999. The study  
35  
36 79 protocol was approved by a Multicentre Research Ethics Committee (Scotland A Research  
37  
38 80 Ethics Committee) and participants gave written informed consent. Details of the recruitment  
39  
40 81 process have been described previously [1]. In brief, a combination of general practitioner  
41  
42 82 (GP) recruitment and postal recruitment was used. The GP recruitment invited men and  
43  
44 83 women aged 35 to 59 years registered with participating GPs and recruited 7,421 participants.  
45  
46 84 The postal recruitment was targeted at vegetarians, vegans, and other people interested in diet  
47  
48 85 and health, by contacting members of The Vegetarian Society, The Vegan Society, and via  
49  
50 86 leaflets enclosed in vegetarian and health food magazines and displayed in health-food shops,  
51  
52 87 and recruited 57,990 participants aged  $\geq 20$  years. Altogether, 57,443 participants completed a  
53  
54 88 full recruitment questionnaire which asked about their personal details (including postcode to  
55  
56  
57  
58  
59  
60

1  
2  
3 89 which a Townsend index of area-level deprivation was assigned [15]), habitual diet and other  
4  
5 90 health and lifestyle characteristics, including personal and family medical history, medication  
6  
7 91 use, socio-economic characteristics, smoking and drinking behaviour, and physical activity  
8  
9 92 levels. A follow-up questionnaire was sent to surviving participants approximately 5 years  
10  
11 93 after recruitment (mostly from 2000 to 2003), and a second follow-up questionnaire was  
12  
13 94 mailed approximately 10 years after recruitment (mostly in 2007). In the follow-up  
14  
15 95 questionnaires, updated information was gathered on diet, health and lifestyle, including self-  
16  
17 96 reported current health.  
18  
19  
20  
21 97  
22  
23

#### 24 98 **Assessment of diet group**

25  
26  
27 99 In the recruitment questionnaire and each subsequent follow-up questionnaire, four questions  
28  
29 100 were asked regarding consumption of meat, fish, dairy products, and eggs, in the form of “Do  
30  
31 101 you eat any meat?” or similar for the other three food groups. Responses to these questions  
32  
33 102 were used to assign participants to one of four diet groups at each time point: meat eaters  
34  
35 103 (participants who ate meat, irrespective of whether they ate fish, dairy products or eggs); fish  
36  
37 104 eaters (participants who did not eat meat but did eat fish); vegetarians (participants who did  
38  
39 105 not eat meat or fish, but did eat one or both of dairy products and eggs), and vegans  
40  
41 106 (participants who did not eat meat, fish, dairy products, or eggs).  
42  
43  
44  
45 107  
46  
47

#### 48 108 **Assessment of participation in screening, HRT and medication use**

49  
50  
51 109 In the follow-up questionnaires, women were asked if they had ever had a breast screening by  
52  
53 110 mammography, cervical screening by the smear test (only on the 5 year follow-up  
54  
55 111 questionnaire), or used HRT, and men were asked if they had ever had a prostate specific  
56  
57  
58  
59  
60

1  
2  
3 112 antigen (PSA) test (only on the 10 year follow-up questionnaire). On the 10 year follow-up  
4  
5 113 questionnaire, all participants were asked if they had used any medication for most of the last  
6  
7 114 four weeks, with 36 named medications and a free text field for reporting regular use of any  
8  
9 115 medication not on the list; participants were also asked if they had been diagnosed with any  
10  
11 116 of a list of 29 medical conditions, and the year when the condition was first diagnosed. The  
12  
13 117 full list of the 36 medications and 29 medical conditions is given in Supplementary text 1 and  
14  
15  
16 118 2. The corresponding question on medication use on the 5 year questionnaire was shorter,  
17  
18 119 with 20 named medications and 26 medical conditions.

19  
20  
21 120 For assessment of specific medication use, five common medical conditions associated with  
22  
23 121 specific medications were identified: high blood pressure (commonly treated with one or  
24  
25 122 more of amlodipine, enalapril, frusemide, propranolol, atenolol, bendrofluazide, lisinopril and  
26  
27 123 nifedipine), high blood cholesterol (atorvastatin and simvastatin), asthma (beclomethasone  
28  
29 124 and salbutamol), diabetes (insulin and metformin), and thyroid disease (thyroxine).

30  
31  
32 125

## 33 34 35 126 **Statistical analyses**

36  
37  
38 127 Information on assignment to diet group and assessment of health behaviour from the 10 year  
39  
40 128 follow-up questionnaire was used for our analyses, except for the assessment of participation  
41  
42 129 in cervical screening which was only asked on the 5 year follow-up questionnaire.  
43  
44  
45 130 Participants were excluded from all analysis if they did not answer the relevant questions to  
46  
47 131 be assigned to an appropriate diet group (n=28), and in order to ensure that an overlapping  
48  
49 132 population was used for the analyses of all outcomes, they were also excluded if they did not  
50  
51 133 answer the relevant question on medication use (n=407). For the analyses related to  
52  
53 134 participation in breast screening, cervical screening, PSA testing or HRT use, only women or  
54  
55 135 men who answered the relevant question and were in the specified age group at questionnaire

1  
2  
3 136 completion were included. The age group specifications were as follows: age 50 to 74 years  
4  
5 137 for breast screening, age 25 to 74 years for cervical screening, age 50 to 84 years for PSA  
6  
7 138 testing, and age 50 to 74 years for HRT use. For HRT use, we further restricted the analysis  
8  
9 139 to post-menopausal women, determined by including only participants who answered yes to  
10  
11 140 the question ‘Have you been through your menopause?’ on the follow-up questionnaire.

12  
13  
14 141 For each analysis, we used Poisson regression to estimate prevalence ratios (95% confidence  
15  
16 142 intervals, CI) of cancer screening or testing (breast screening, cervical screening, PSA  
17  
18 143 testing), HRT use, or medication use in different diet groups, using meat eaters as the  
19  
20 144 reference group. For analyses of cancer screening or testing and use of HRT, we adjusted for  
21  
22 145 age at follow-up (<40, 40-44, 45-49, 50-54, 55-59, 60-64, 65-69, 70-74,  $\geq 75$  years as  
23  
24 146 appropriate for the age range included in the analysis), region of recruitment (eight  
25  
26 147 geographical regions across the UK), and self-reported current health (excellent, good, fair,  
27  
28 148 poor, unknown). For analyses of any medication use, we adjusted for the cross-stratification  
29  
30 149 of sex and age at follow-up, region of recruitment, self-reported current health, and the  
31  
32 150 number of self-reported illnesses or conditions (0, 1, 2, 3,  $\geq 4$ ). To further assess whether any  
33  
34 151 variation in medication use by diet group varied by health status, we repeated the analyses  
35  
36 152 stratified by the number of self-reported illnesses or conditions using the above  
37  
38 153 categorisation. Subsequently, for each of high blood pressure, high blood cholesterol, asthma,  
39  
40 154 diabetes, and thyroid disease, we estimated the prevalence ratios of taking appropriate  
41  
42 155 medication by diet group among people diagnosed with each condition in turn, adjusting for  
43  
44 156 covariates as above and additionally for years since reported diagnosis, calculated as year of  
45  
46 157 follow-up questionnaire completion minus reported year of diagnosis (<2, 2-3, 4-5, 6-9,  $\geq 10$   
47  
48 158 years, unknown).

49  
50  
51  
52  
53  
54 159 As sensitivity analyses, we repeated the analyses as follows: using data from the 5 year  
55  
56 160 follow-up questionnaire where available; and further adjusting for smoking status (never,

1  
2  
3 161 former, current, unknown), alcohol consumption (<1 g/day, 1-7 g/day, 8-15 g/day, ≥16  
4  
5 162 g/day), Townsend index of area-level deprivation (quartiles and unknown), and education  
6  
7 163 level (no qualifications, basic secondary e.g. O level, higher secondary e.g. A level, degree,  
8  
9 164 unknown). All statistical analyses were performed using Stata release 14.1 (StataCorp), and *P*  
10  
11 165 values < 0.05 were considered statistically significant.

166

## 167 **RESULTS**

### 168 **Cohort characteristics**

169 Overall, 57,443 participants in EPIC-Oxford cohort completed a full recruitment  
170 questionnaire, of whom 38,043 (66%) completed the 5 year follow-up questionnaire, and  
171 31,695 (55%) completed the 10 year follow-up questionnaire. After excluding participants  
172 who did not answer the relevant questions on diet group or on medication use, data for 31,260  
173 participants who completed the 10 year follow-up questionnaire (18,155 meat eaters, 5,012  
174 fish eaters, 7,179 vegetarians, and 914 vegans) were used for most of the analyses.  
175 Characteristics of the participants are presented in **Table 1**. Overall, non-meat eaters were  
176 younger, more likely to report having excellent health, less likely to report taking medication  
177 in the past four weeks, and less likely to have reported any illnesses or conditions.

178

### 179 **Participation in screening and use of HRT and medications**

180 Overall, 14,016 women were included in the analyses for breast screening, 27,781 women for  
181 cervical screening, and 4,783 men for PSA testing (**Table 2**). In women, compared with meat  
182 eaters, vegetarians (prevalence ratio; 95% CI: 0.94; 0.89, 0.98) and vegans (0.82; 0.71, 0.95),  
183 but not fish eaters (0.96; 0.92, 1.01) had lower reported attendance of breast screening, but no

1  
2  
3 184 significant heterogeneity was observed between the diet groups for reported participation in  
4  
5 185 cervical screening ( $P$ -heterogeneity=0.37). In men, vegetarians had lower reported uptake of  
6  
7 186 PSA testing (0.82; 0.71, 0.96) than meat eaters, while the difference in uptake appeared lower  
8  
9 187 but did not reach statistical significance in vegans (0.72; 0.50, 1.02), and was not  
10  
11 188 significantly different in fish eaters (0.99; 0.85, 1.07). For HRT use, women who were non-  
12  
13 189 meat eaters reported lower use (fish eaters: 0.80; 0.73, 0.88; vegetarians: 0.74; 0.68, 0.81;  
14  
15 190 vegans: 0.42; 0.30, 0.60) compared with women who were meat eaters (**Table 3**).

16  
17  
18 191 Irrespective of the number of self-reported illnesses and conditions, non-meat eaters reported  
19  
20 192 lower use of any medication (fish eaters: 0.92; 0.87, 0.96; vegetarians: 0.93; 0.89, 0.98;  
21  
22 193 vegans 0.71; 0.63, 0.81) compared with meat eaters (**Table 4**). When the analyses were  
23  
24 194 stratified by the number of self-reported illnesses or conditions, non-meat eaters with no  
25  
26 195 ( $P<0.0001$ ) or one ( $P=0.0002$ ) illness or condition reported lower medication use compared  
27  
28 196 with meat eaters, but the association was attenuated and no longer statistically significant  
29  
30 197 among participants with two, three, or four or more illnesses or conditions. For medication  
31  
32 198 use specific to several common illnesses and conditions, no significant differences were  
33  
34 199 observed between the diet groups in the reported use of appropriate medications for high  
35  
36 200 blood pressure, high blood cholesterol, asthma, diabetes, or thyroid disease, among  
37  
38 201 participants diagnosed with each of these conditions (**Table 5**). Results were consistent when  
39  
40 202 we repeated the analyses where possible using data from the 5 year follow-up questionnaire,  
41  
42 203 or when we further adjusted for smoking, alcohol consumption, Townsend deprivation index,  
43  
44 204 and education level (results not shown).

45  
46  
47  
48  
49  
50 205

## 206 **DISCUSSION**

### 207 **Summary of results**

208 In this UK population-based cohort with a large proportion of participants from different diet  
209 groups, we generally observed lower participation in breast screening and lower HRT use  
210 among women who were non-meat eaters (separately categorised as fish eaters, vegetarians,  
211 and vegans) compared with women who were meat eaters. Vegetarian men had lower  
212 participation in PSA testing compared with meat eating men, but no significant difference  
213 was observed for cervical screening in women across the diet groups. For medication use,  
214 non-meat eaters were less likely to report taking medications than meat eaters overall, but  
215 there were no significant differences in medication use among people reporting two or more  
216 illnesses or conditions, or for people reporting taking specific medications for various self-  
217 reported conditions.

218

### 219 **Comparison with other studies**

220 Few studies have reported on the participation in cancer screening or testing, HRT use or  
221 medication use among people of different diet groups, and no study has assessed all these  
222 behaviours simultaneously in the same cohort. For breast cancer screening, consistent with  
223 our findings, the Swedish Malmö Diet and Cancer Study reported that non-attendance for  
224 breast cancer screening was more likely in people who were vegetarians or vegans (odds ratio  
225 or OR; 95% confidence interval: 1.49; 1.11, 1.99) [9]. Analyses of data from the Adventist  
226 Health Study-2 in the United States and Canada showed that all non-meat eaters were less  
227 likely to report PSA testing compared with meat eaters (0.79; 0.66, 0.95 for fish eaters; 0.76;  
228 0.67, 0.86 for vegetarians; and OR 0.50; 0.42, 0.60 for vegans) [10], whereas we only

1  
2  
3 229 observed a lower reported uptake among the vegetarians but not the fish eaters (nor the  
4  
5 230 vegans, perhaps because of limited numbers) compared with meat eaters in EPIC-Oxford.  
6  
7 231 However, given the much higher rates of PSA testing in the Adventist Health Study-2 (73.3%  
8  
9 232 versus 31.5% in EPIC-Oxford), attitudes towards screening are likely to be different in the  
10  
11 233 two populations, and therefore the results might not be directly comparable. Similar to our  
12  
13 234 study, the Adventist Health Study-2 also reported lower ever use of HRT (adjusted for age  
14  
15 235 and race) in pesco-vegetarians (21.0%) and lacto-vegetarians (20.4%), and the lowest use in  
16  
17 236 vegans (16.2%), when compared with non-vegetarians (22.4%) [5].  
18  
19  
20

21 237 For medication use, a cross-sectional study in a Belgian population reported lower use of  
22  
23 238 prescribed medications when comparing vegetarians to a reference Belgian population  
24  
25 239 (25.5% versus 47.3%,  $p < 0.001$ ) [13]. While this is consistent with our findings on overall  
26  
27 240 medication use, the study did not assess the use of medications stratified by the number of  
28  
29 241 illnesses, nor did they assess appropriate medication use for specific medical conditions. No  
30  
31 242 studies were found which examined participation of cervical screening among people of  
32  
33 243 different diet groups.  
34  
35  
36

37 244

### 39 245 **Interpretation of findings and implications**

41  
42  
43 246 Our findings indicate differences in some health related behaviours between people of  
44  
45 247 different diet groups, although the reasons behind such differences are unclear. For the  
46  
47 248 observed differences in screening rates, possible explanations could be related to different  
48  
49 249 attitudes towards the screening programmes. In the UK since 1988 [6,16], all women aged 50  
50  
51 250 to 70 are invited to attend breast cancer screening clinics [17] and all women aged 25 to 64  
52  
53 251 are invited for cervical screening [18] at regular intervals. On the other hand, there is no  
54  
55 252 national programme for PSA testing, although men over the age of 50 are eligible to arrange  
56  
57  
58  
59  
60



1  
2  
3 253 for testing via their GP if they wish [19]. In studies which assessed attitudes towards cancer  
4  
5 254 screening or testing, common reasons which affect people's participation in screening include  
6  
7 255 their education level and knowledge of the procedure, recommendation by their doctor, fear  
8  
9 256 of the procedure or the outcome, or their perceived risk of cancer [20–23]. If vegetarians and  
10  
11 257 vegans felt their diets or lifestyles were protective against cancer for example, they might be  
12  
13 258 more likely to forgo cancer screening as a result of lower perceived risk. However, no  
14  
15 259 information was found on whether or how such attitudes may vary by diet group.

16  
17  
18 260 In a small focus group study in Scotland which asked participants about their attitudes  
19  
20 261 towards cancer screening (n=31 for cervical screening, n=10 for breast screening), the study  
21  
22 262 participants reported that they felt pressure from health care professionals, family and friends  
23  
24 263 to attend cervical screening but not breast screening, and that they also considered cervical  
25  
26 264 screening to be normative routine behaviour [24]. Such differences in attitudes towards breast  
27  
28 265 screening and cervical screening are of interest, as this may help to explain the differences we  
29  
30 266 observed in participation for breast screening but not cervical screening, if the latter was  
31  
32 267 considered routine behaviour. However, relevant evidence is lacking, and both dietary and  
33  
34 268 non-dietary factors which are associated with attendance for either breast screening or PSA  
35  
36 269 testing deserve further study.

37  
38  
39  
40  
41 270 Reasons for the observed lower prevalence of HRT use and medication use among people of  
42  
43 271 different diet groups are also unclear. The prevalence of medication use in meat eaters (56%)  
44  
45 272 in EPIC-Oxford was slightly higher than the UK average of 43% of men and 50% of women  
46  
47 273 aged 16 or above who reported taking at least one prescribed medicine in the last week [25],  
48  
49 274 confirming the relatively low prevalence of medication use in the vegetarians (39%) and  
50  
51 275 vegans (28%). However, given the differences in age ranges and possible differences in  
52  
53 276 medications accounted for, strict comparisons cannot be made. Because lower reported use of  
54  
55 277 medications was observed even in people with no (especially) or only one reported illness or

1  
2  
3 278 condition, better health among non-meat eaters is unlikely to be the only, or a sufficient  
4  
5 279 explanation for the differences. Non-meat eaters may also be reluctant to take medications  
6  
7 280 which are likely to contain animal-derived products [26], or may prefer to use homoeopathic  
8  
9 281 medications [13] or other alternative therapies. Since information on medication use in this  
10  
11 282 study was based on a pre-specified list from the follow-up questionnaire, it was not possible  
12  
13 283 to assess the use of alternative therapies or any other named medications, despite their  
14  
15 284 possible contributions to prevalence of overall medication use.

16  
17  
18 285 Differential participation in screening for breast or prostate cancer, use of HRT, and use of  
19  
20 286 medications for people of distinct diet groups may ultimately lead to differences in disease  
21  
22 287 incidence or prognosis due to possible detection bias and differential post diagnosis  
23  
24 288 treatment. For example, breast cancer screening results in higher incidence but reduced  
25  
26 289 mortality from breast cancer among those who are screened [6]. Prostate cancer testing is also  
27  
28 290 linked to increased incidence in those who are tested [27,28]. Therefore, using breast cancer  
29  
30 291 as an example, given the lower rates of breast cancer screening among non-meat eating  
31  
32 292 women both in EPIC-Oxford and in the Swedish Malmö Diet and Cancer Study [9], it is  
33  
34 293 possible that the observed incidence of breast cancer in these diet groups underestimates the  
35  
36 294 true incidence owing to detection bias, but that ultimately these women would be expected to  
37  
38 295 have a somewhat higher mortality from breast cancer. Therefore, future work on assessing  
39  
40 296 breast cancer risk in people of different diet groups should take into account any differences  
41  
42 297 in screening rates between diet groups.

43  
44  
45  
46  
47 298 Similarly, it is not clear why there was differential use of HRT in the four diet groups, for  
48  
49 299 example whether it was because non-meat eaters were less likely to have symptoms, or  
50  
51 300 because they were less likely to seek treatment when symptoms appear. Regardless of the  
52  
53 301 underlying reason, the observed lower reported use of HRT among non-meat eating women  
54  
55 302 deserves attention, because use of HRT may confound any observed associations between

1  
2  
3 303 diet group and breast cancer, given that HRT preparations containing oestrogens and  
4  
5 304 progestogens have been shown to increase the risk of breast cancer [7,8].  
6  
7

8 305 Overall, our findings showed some differences in health related behaviours between people  
9  
10 306 of different diet groups, thereby highlighting the need to consider such differences when  
11  
12 307 conducting longitudinal analyses in these populations. Further study is warranted to  
13  
14 308 understand why people of different diet groups have differential participation in breast  
15  
16 309 screening or prostate cancer testing, HRT use, and overall medication use, and whether or  
17  
18 310 how these differences are related to future disease risk.  
19  
20

21  
22 311

### 23 24 312 **Strengths and limitations**

25  
26  
27 313 This study is the first to simultaneously examine participation in cancer screening or testing,  
28  
29 314 HRT use and medication use in different diet groups. A strength of the study is the large  
30  
31 315 sample size recruited from across different regions in the UK. Additionally, information was  
32  
33 316 collected on a range of factors which may also be associated with the behaviours of interest,  
34  
35 317 allowing adjustment for these factors. Of potential limitations, recall bias is possible because  
36  
37 318 assessment of the behaviours of interest (i.e. breast screening, PSA testing, HRT use and  
38  
39 319 overall medication use) as well as existing medical conditions was based on self-report,  
40  
41 320 although there is no indication that such misclassification bias should differ by diet group.  
42  
43 321 The reasons for which people adhered to each diet group were not recorded, although such  
44  
45 322 reasons may be relevant to the other health behaviours studied. Because of the relatively  
46  
47 323 small number of vegans in our study sample, the role of chance in explaining the findings  
48  
49 324 relating to this diet group, especially subgroup analyses related to medication use, cannot be  
50  
51 325 ruled out. As with most population cohorts, some degree of self-selection and healthy cohort  
52  
53 326 bias may also be present.  
54  
55  
56  
57  
58  
59  
60

1  
2  
3 327  
4  
56 328 **CONCLUSIONS**  
7

8 329 In this population, we observed differences in breast screening, PSA testing, HRT use and  
9  
10 330 overall medication use between meat eaters, fish eaters, vegetarians and vegans, but no  
11  
12 331 significant differences between diet groups for cervical screening, or medication use in  
13  
14 332 people with two or more illnesses or for specific conditions. The reasons for these differences  
15  
16 333 require further investigation. Nonetheless, such differences may be related to or could  
17  
18 334 confound any differences in observed morbidity or mortality from cancer and other diseases  
19  
20 335 between people of different diet groups, and therefore should be considered in future  
21  
22 336 epidemiological studies.  
23  
24  
25  
26

27 337  
2829 338 **STATEMENTS**  
3031 339 **Acknowledgements**  
32

33 340 We thank all participants in the EPIC-Oxford cohort for their invaluable contribution. The  
34  
35 341 work is supported by the UK Medical Research Council MR/M012190/1 and Cancer  
36  
37 342 Research UK 570/A16491 and C9221/A19170. KEB is supported by the Girdlers' New  
38  
39 343 Zealand Health Research Council Fellowship. TJK is a member of the Vegan Society; the  
40  
41 344 other authors had no conflicts of interest.  
42  
43  
44  
45

46 345  
4748 346 **Availability of data and materials**  
49

50 347 The data access policy for EPIC-Oxford is available via the study website (<http://www.epic-oxford.org/data-access-sharing-and-collaboration/>).  
51  
52  
53  
54  
55  
56

1  
2  
3 349  
4  
5

6 350 **Author's contributions**  
7

8 351 TYNT, PNA, and TJK conceived and designed the research question. TYNT and PNA  
9  
10 352 analysed the data. TYNT wrote the first draft of the manuscript, and PNA, KEB and TJK  
11  
12 353 provided input on data analysis and interpretation of results. All authors revised the  
13  
14 354 manuscript critically for important intellectual content, and read and approved the final  
15  
16 355 manuscript.  
17  
18  
19  
20  
21  
22  
23  
24  
25  
26  
27  
28  
29  
30  
31  
32  
33  
34  
35  
36  
37  
38  
39  
40  
41  
42  
43  
44  
45  
46  
47  
48  
49  
50  
51  
52  
53  
54  
55  
56  
57  
58  
59  
60

Table 1 Characteristics by diet group of participants in the EPIC-Oxford study who completed the second follow-up questionnaire (n=31260)<sup>1</sup>.

| Characteristic                                       | Meat eaters  | Fish eaters | Vegetarians | Vegans      | Total        |
|------------------------------------------------------|--------------|-------------|-------------|-------------|--------------|
| Number of participants (% female)                    | 18155 (78.2) | 5012 (81.8) | 7179 (76.3) | 914 (66.1)  | 31260 (78.0) |
| Mean (SD) age at questionnaire completion, years     | 58.9 (12.5)  | 53.8 (12.5) | 51.6 (12.7) | 50.7 (12.3) | 56.1 (13.0)  |
| Smoking status <sup>2</sup> , n (%)                  |              |             |             |             |              |
| Never smoker                                         | 10073 (55.7) | 2786 (55.6) | 4339 (60.5) | 547 (59.9)  | 17745 (56.9) |
| Former smoker                                        | 6927 (38.3)  | 1961 (39.2) | 2460 (34.3) | 330 (36.1)  | 11678 (37.5) |
| Current smoker                                       | 1094 (6.0)   | 260 (5.2)   | 367 (5.1)   | 36 (3.9)    | 1757 (5.6)   |
| Mean (SD) alcohol consumption, g/d                   | 8.7 (9.3)    | 8.2 (8.7)   | 7.6 (8.9)   | 6.7 (9.2)   | 8.3 (9.1)    |
| Self-reported current health <sup>2</sup> , n (%)    |              |             |             |             |              |
| Excellent                                            | 3713 (21.9)  | 1323 (28.1) | 1950 (28.7) | 325 (37.2)  | 7311 (24.9)  |
| Good                                                 | 9962 (58.8)  | 2688 (57.0) | 3851 (56.6) | 446 (51.0)  | 16947 (57.8) |
| Fair                                                 | 2858 (16.9)  | 612 (13.0)  | 876 (12.9)  | 80 (9.2)    | 4426 (15.1)  |
| Poor                                                 | 400 (2.4)    | 92 (2.0)    | 122 (1.8)   | 23 (2.6)    | 637 (2.2)    |
| Townsend deprivation index <sup>2</sup> , n (%)      |              |             |             |             |              |
| Richest category                                     | 4463 (27.6)  | 984 (21.8)  | 1542 (23.7) | 153 (18.3)  | 7141 (25.5)  |
| Poorest category                                     | 3438 (21.2)  | 1207 (26.8) | 1732 (26.7) | 285 (34.1)  | 6662 (23.8)  |
| In same diet group at recruitment, n (%)             | 15908 (87.7) | 3057 (61.1) | 6373 (89.1) | 573 (62.7)  | 25911 (83.0) |
| Taking medication in the past 4 weeks, n (%)         | 10196 (56.2) | 2105 (42.0) | 2829 (39.4) | 255 (27.9)  | 15385 (49.2) |
| Number of reported illnesses and conditions, n (%)   |              |             |             |             |              |
| None                                                 | 4455 (24.5)  | 1635 (32.6) | 2603 (36.3) | 344 (37.6)  | 9037 (28.9)  |
| One                                                  | 4724 (26.0)  | 1472 (29.4) | 2170 (30.2) | 291 (31.8)  | 8657 (27.7)  |
| Two                                                  | 3682 (20.3)  | 906 (18.1)  | 1261 (17.6) | 154 (16.8)  | 6003 (19.2)  |
| Three                                                | 2404 (13.2)  | 524 (10.5)  | 630 (8.8)   | 74 (8.1)    | 3632 (11.6)  |
| Four or more                                         | 2890 (15.9)  | 475 (9.5)   | 515 (7.2)   | 51 (5.6)    | 3931 (12.6)  |
| Reported high blood pressure <sup>2</sup> , n (%)    | 4397 (29.2)  | 686 (16.2)  | 944 (15.2)  | 85 (10.6)   | 6112 (23.2)  |
| and taking appropriate medication, n (%)             | 2573 (58.5)  | 357 (52.0)  | 430 (45.6)  | 40 (47.1)   | 3400 (55.6)  |
| Reported high blood cholesterol <sup>2</sup> , n (%) | 3351 (23.1)  | 561 (13.5)  | 645 (10.5)  | 44 (5.5)    | 4601 (18.0)  |
| and taking appropriate medication, n (%)             | 1646 (49.1)  | 209 (37.3)  | 243 (37.7)  | 14 (31.8)   | 2112 (45.9)  |
| Reported asthma <sup>2</sup> , n (%)                 | 1885 (13.6)  | 496 (12.1)  | 758 (12.4)  | 88 (11.1)   | 3227 (12.9)  |
| and taking appropriate medication, n (%)             | 737 (39.1)   | 169 (34.1)  | 246 (32.5)  | 17 (19.3)   | 1169 (36.2)  |
| Reported diabetes <sup>2</sup> , n (%)               | 707 (5.2)    | 75 (1.9)    | 119 (2.0)   | 7 (0.9)     | 908 (3.7)    |
| and taking appropriate medication, n (%)             | 446 (63.1)   | 41 (54.7)   | 84 (70.6)   | 6 (85.7)    | 577 (63.5)   |
| Reported thyroid disease <sup>2</sup> , n (%)        | 1545 (11.1)  | 380 (9.2)   | 465 (7.6)   | 56 (7.1)    | 2446 (9.8)   |
| and taking appropriate medication, n (%)             | 1191 (77.1)  | 273 (71.8)  | 337 (72.5)  | 37 (66.1)   | 1838 (75.1)  |

1. Based on participant characteristics at the time of the second follow-up questionnaire (completed approximately 10 years from baseline, around 2007).

2. Unknown for some participants.

Table 2 Participation in screening by diet group of women and men in the EPIC-Oxford study.

| Screening/Diet group                                 | Number answering the relevant question <sup>1</sup> | Number (%) answering in the affirmative <sup>1</sup> | Prevalence ratio (95% CI) <sup>1</sup> |
|------------------------------------------------------|-----------------------------------------------------|------------------------------------------------------|----------------------------------------|
| <b>Breast screening<sup>2</sup></b>                  |                                                     |                                                      |                                        |
| Meat eaters                                          | 9239                                                | 8813 (95.4)                                          | 1.00 (ref)                             |
| Fish eaters                                          | 2143                                                | 1928 (90.0)                                          | 0.96 (0.92,1.01)                       |
| Vegetarians                                          | 2395                                                | 2078 (86.8)                                          | 0.94 (0.89,0.98)                       |
| Vegans                                               | 239                                                 | 182 (76.2)                                           | 0.82 (0.71,0.95)                       |
|                                                      |                                                     |                                                      | <i>P-het=0.004</i>                     |
| <b>Cervical screening<sup>3</sup></b>                |                                                     |                                                      |                                        |
| Meat eaters                                          | 15936                                               | 15365 (96.4)                                         | 1.00 (ref)                             |
| Fish eaters                                          | 4513                                                | 4369 (96.8)                                          | 1.00 (0.97,1.03)                       |
| Vegetarians                                          | 6574                                                | 6268 (95.3)                                          | 0.98 (0.95,1.01)                       |
| Vegans                                               | 758                                                 | 691 (91.2)                                           | 0.94 (0.87,1.02)                       |
|                                                      |                                                     |                                                      | <i>P-het=0.37</i>                      |
| <b>Prostate specific antigen testing<sup>4</sup></b> |                                                     |                                                      |                                        |
| Meat eaters                                          | 3078                                                | 1066 (34.6)                                          | 1.00 (ref)                             |
| Fish eaters                                          | 594                                                 | 181 (30.5)                                           | 0.99 (0.85,1.17)                       |
| Vegetarians                                          | 947                                                 | 228 (24.1)                                           | 0.82 (0.71,0.96)                       |
| Vegans                                               | 164                                                 | 33 (20.1)                                            | 0.72 (0.50,1.02)                       |
|                                                      |                                                     |                                                      | <i>P-het=0.023</i>                     |

1. Number answering the relevant question and number (%) answering in the affirmative were as observed. Prevalence ratios were adjusted for age at follow-up (<40, 40-44, 45-49, 50-54, 55-59, 60-64, 65-69, 70-74, ≥75 years, as appropriate according to the age range of included participants), region of residence (eight regions), and self-reported current health (excellent, good, fair, poor, unknown).
2. Included women aged 50 to 74 who answered the relevant question on the second (10 year) follow-up questionnaire.
3. Included women aged 25 to 74 who answered the relevant question on the first (5 year) follow-up questionnaire.
4. Included men aged 50 to 84 who answered the relevant question on the second (10 year) follow-up questionnaire.

Table 3 Use of hormone replacement therapy by diet group of women in the EPIC-Oxford study.

| Diet group  | Number answering the relevant question <sup>1</sup> | Number (%) answering in the affirmative <sup>1</sup> | Prevalence ratio (95% CI) <sup>1</sup> |
|-------------|-----------------------------------------------------|------------------------------------------------------|----------------------------------------|
| Meat eaters | 6911                                                | 3098 (44.8)                                          | 1.00 (ref)                             |
| Fish eaters | 1614                                                | 541 (33.5)                                           | 0.80 (0.73,0.88)                       |
| Vegetarians | 1778                                                | 541 (30.4)                                           | 0.74 (0.68,0.81)                       |
| Vegans      | 188                                                 | 31 (16.5)                                            | 0.42 (0.30,0.60)                       |
|             |                                                     |                                                      | <i>P-het&lt;0.0001</i>                 |

1. Number answering the relevant question and number (%) answering in the affirmative were as observed. Prevalence ratios were adjusted for age at follow-up (50-54, 55-59, 60-64, 65-69, 70-74 years), region of residence (eight regions), and self-reported current health (excellent, good, fair, poor, unknown). Included post-menopausal women aged 50 to 74 who answered the relevant question on the second (10 year) follow-up questionnaire.

Table 4 Medication use by number of self-reported illnesses or conditions and diet group of participants in the EPIC-Oxford study.<sup>1</sup>

| Number of self-reported illnesses or conditions / Diet group | Number of participants <sup>2</sup> | Percentage taking any medication <sup>2</sup> | Prevalence ratio (95% CI) <sup>2</sup> |
|--------------------------------------------------------------|-------------------------------------|-----------------------------------------------|----------------------------------------|
| <b>Any number<sup>3</sup></b>                                |                                     |                                               |                                        |
| Meat eaters                                                  | 18155                               | 56.2                                          | 1.00 (ref)                             |
| Fish eaters                                                  | 5012                                | 42.0                                          | 0.92 (0.87-0.96)                       |
| Vegetarians                                                  | 7179                                | 39.4                                          | 0.93 (0.89-0.98)                       |
| Vegans                                                       | 914                                 | 27.9                                          | 0.71 (0.63-0.81)                       |
|                                                              |                                     |                                               | <i>P-het</i> <0.0001                   |
| <b>None</b>                                                  |                                     |                                               |                                        |
| Meat eaters                                                  | 4455                                | 16.9                                          | 1.00 (ref)                             |
| Fish eaters                                                  | 1635                                | 11.9                                          | 0.80 (0.68-0.94)                       |
| Vegetarians                                                  | 2603                                | 11.5                                          | 0.80 (0.70-0.92)                       |
| Vegans                                                       | 344                                 | 6.1                                           | 0.47 (0.30-0.72)                       |
|                                                              |                                     |                                               | <i>P-het</i> <0.0001                   |
| <b>One</b>                                                   |                                     |                                               |                                        |
| Meat eaters                                                  | 4724                                | 48.9                                          | 1.00 (ref)                             |
| Fish eaters                                                  | 1472                                | 39.1                                          | 0.87 (0.80-0.96)                       |
| Vegetarians                                                  | 2170                                | 40.5                                          | 0.91 (0.84-0.99)                       |
| Vegans                                                       | 291                                 | 29.2                                          | 0.69 (0.55-0.85)                       |
|                                                              |                                     |                                               | <i>P-het</i> =0.0002                   |
| <b>Two</b>                                                   |                                     |                                               |                                        |
| Meat eaters                                                  | 3682                                | 66.9                                          | 1.00 (ref)                             |
| Fish eaters                                                  | 906                                 | 58.8                                          | 0.94 (0.86-1.04)                       |
| Vegetarians                                                  | 1261                                | 58.1                                          | 0.97 (0.89-1.06)                       |
| Vegans                                                       | 154                                 | 42.2                                          | 0.74 (0.58-0.95)                       |
|                                                              |                                     |                                               | <i>P-het</i> =0.082                    |
| <b>Three</b>                                                 |                                     |                                               |                                        |
| Meat eaters                                                  | 2404                                | 82.6                                          | 1.00 (ref)                             |
| Fish eaters                                                  | 524                                 | 74.0                                          | 0.94 (0.84-1.05)                       |
| Vegetarians                                                  | 630                                 | 73.0                                          | 0.94 (0.84-1.04)                       |
| Vegans                                                       | 74                                  | 59.5                                          | 0.78 (0.57-1.05)                       |
|                                                              |                                     |                                               | <i>P-het</i> =0.22                     |
| <b>Four or more</b>                                          |                                     |                                               |                                        |
| Meat eaters                                                  | 2890                                | 93.0                                          | 1.00 (ref)                             |
| Fish eaters                                                  | 475                                 | 86.9                                          | 0.96 (0.86-1.06)                       |
| Vegetarians                                                  | 515                                 | 88.9                                          | 0.98 (0.89-1.09)                       |
| Vegans                                                       | 51                                  | 78.4                                          | 0.87 (0.63-1.19)                       |
|                                                              |                                     |                                               | <i>P-het</i> =0.70                     |

1. Refers to medication use for most of the past four weeks on the second (10 year) follow-up questionnaire, excluding HRT and contraceptive pills.
2. Number of participants and percentage taking any medication were as observed. Prevalence ratios were adjusted for the cross-classification of sex and age at follow-up (<40, 40-44, 45-49, 50-54, 55-59, 60-64, 65-69, 70-74, ≥75 years), region of residence (eight regions), and self-reported current health (excellent, good, fair, poor, unknown).
3. Prevalence ratios for this category were further adjusted for the number of self-reported illnesses or conditions (0, 1, 2, 3, ≥4).



Table 5 Medication use for specific conditions by diet group of participants in the EPIC-Oxford study.<sup>1</sup>

| Condition/ Diet group                     | Number reporting the condition (mean years since reported diagnosis) <sup>2</sup> | Number (%) taking appropriate medication <sup>2</sup> | Prevalence ratio (95% CI) <sup>2</sup> |
|-------------------------------------------|-----------------------------------------------------------------------------------|-------------------------------------------------------|----------------------------------------|
| <b>High blood pressure<sup>3</sup></b>    |                                                                                   |                                                       |                                        |
| Meat eaters                               | 4397 (9.8)                                                                        | 2573 (58.5)                                           | 1.00 (ref)                             |
| Fish eaters                               | 686 (9.3)                                                                         | 357 (52.0)                                            | 0.97 (0.86-1.08)                       |
| Vegetarians                               | 944 (9.0)                                                                         | 430 (45.6)                                            | 0.91 (0.82-1.01)                       |
| Vegans                                    | 85 (9.0)                                                                          | 40 (47.1)                                             | 0.92 (0.67-1.26)                       |
|                                           |                                                                                   |                                                       | <i>P-het=0.37</i>                      |
| <b>High blood cholesterol<sup>4</sup></b> |                                                                                   |                                                       |                                        |
| Meat eaters                               | 3351 (6.3)                                                                        | 1646 (49.1)                                           | 1.00 (ref)                             |
| Fish eaters                               | 561 (5.3)                                                                         | 209 (37.3)                                            | 0.88 (0.76-1.01)                       |
| Vegetarians                               | 645 (5.5)                                                                         | 243 (37.7)                                            | 0.94 (0.81-1.08)                       |
| Vegans                                    | 44 (7.1)                                                                          | 14 (31.8)                                             | 0.74 (0.44-1.26)                       |
|                                           |                                                                                   |                                                       | <i>P-het=0.20</i>                      |
| <b>Asthma<sup>5</sup></b>                 |                                                                                   |                                                       |                                        |
| Meat eaters                               | 1885 (25.3)                                                                       | 737 (39.1)                                            | 1.00 (ref)                             |
| Fish eaters                               | 496 (23.2)                                                                        | 169 (34.1)                                            | 0.98 (0.82-1.17)                       |
| Vegetarians                               | 758 (23.4)                                                                        | 246 (32.5)                                            | 0.97 (0.84-1.14)                       |
| Vegans                                    | 88 (27.9)                                                                         | 17 (19.3)                                             | 0.67 (0.41-1.09)                       |
|                                           |                                                                                   |                                                       | <i>P-het=0.45</i>                      |
| <b>Diabetes<sup>6</sup></b>               |                                                                                   |                                                       |                                        |
| Meat eaters                               | 707 (10.0)                                                                        | 446 (63.1)                                            | 1.00 (ref)                             |
| Fish eaters                               | 75 (14.8)                                                                         | 41 (54.7)                                             | 0.78 (0.56-1.08)                       |
| Vegetarians                               | 119 (10.6)                                                                        | 84 (70.6)                                             | 1.05 (0.81-1.35)                       |
| Vegans                                    | 7 (13.2)                                                                          | 6 (85.7)                                              | 1.07 (0.45-2.51)                       |
|                                           |                                                                                   |                                                       | <i>P-het=0.46</i>                      |
| <b>Thyroid disease<sup>7</sup></b>        |                                                                                   |                                                       |                                        |
| Meat eaters                               | 1545 (13.2)                                                                       | 1191 (77.1)                                           | 1.00 (ref)                             |
| Fish eaters                               | 380 (11.6)                                                                        | 273 (71.8)                                            | 0.95 (0.83-1.09)                       |
| Vegetarians                               | 465 (11.2)                                                                        | 337 (72.5)                                            | 0.97 (0.85-1.10)                       |
| Vegans                                    | 56 (11.8)                                                                         | 37 (66.1)                                             | 0.88 (0.63-1.22)                       |
|                                           |                                                                                   |                                                       | <i>P-het=0.78</i>                      |

1. Refers to medication use for most the past four weeks specific to the condition described, among participants who reported diagnosis for the condition on the second (10 year) follow-up questionnaire.
2. Number reporting the condition (mean years since reported diagnosis) and number (%) taking appropriate medication were as observed. Prevalence ratios were adjusted for the cross-classification of sex and age at follow-up (<40, 40-44, 45-49, 50-54, 55-59, 60-64, 65-69, 70-74, ≥75 years), region of residence (eight regions), self-reported current health (excellent, good, fair, poor, unknown), years since reported diagnosis (calculated as year of follow-up questionnaire completion minus reported year of diagnosis; <2, 2-3, 4-5, 6-9, ≥10 years, unknown), and number of self-reported illnesses or conditions (1, 2, 3, ≥4).
3. Reported use of at least one of amlodipine, enalapril, frusemide, propranolol, atenolol, bendrofluzide, lisinopril and nifedipine.
4. Reported use of at least one of atorvastatin and simvastatin.
5. Reported use of at least one of beclomethasone and salbutamol.
6. Reported use of at least one of insulin and metformin.
7. Reported use of thyroxine.

1  
2  
3 **1 REFERENCES**  
4

- 5  
6 1 Davey GK, Spencer EA, Appleby PN, *et al.* EPIC-Oxford: lifestyle characteristics and  
7  
8 3 nutrient intakes in a cohort of 33 883 meat-eaters and 31 546 non meat-eaters in the  
9  
10 4 UK. *Public Health Nutr* 2003;**6**:259–68. doi:10.1079/PHN2002430  
11  
12  
13 5 2 Appleby PN, Davey GK, Key TJ. Hypertension and blood pressure among meat eaters,  
14  
15 6 fish eaters, vegetarians and vegans in EPIC-Oxford. *Public Health Nutr* 2002;**5**:645–  
16  
17 7 54. doi:10.1079/PHN2002332  
18  
19  
20 8 3 Wang F, Zheng J, Yang B, *et al.* Effects of Vegetarian Diets on Blood Lipids: A  
21  
22 9 Systematic Review and Meta-Analysis of Randomized Controlled Trials. *J Am Heart*  
23  
24 10 *Assoc* 2015;**4**:e002408. doi:10.1161/JAHA.115.002408  
25  
26  
27 11 4 Key TJ, Appleby PN, Crowe FL, *et al.* Cancer in British vegetarians: Updated analyses  
28  
29 12 of 4998 incident cancers in a cohort of 32,491 meat eaters, 8612 fish eaters, 18,298  
30  
31 13 vegetarians, and 2246 vegans. *Am J Clin Nutr* 2014;**100**:378–85.  
32  
33 14 doi:10.3945/ajcn.113.071266  
34  
35  
36  
37 15 5 Tantamango-Bartley Y, Jaceldo-Siegl K, Fan J, *et al.* Vegetarian Diets and the  
38  
39 16 Incidence of Cancer in a Low-risk Population. *Cancer Epidemiol Biomarkers Prev*  
40  
41 17 2013;**22**:286–94. doi:10.1158/1055-9965.EPI-12-1060  
42  
43  
44 18 6 Independent UK Panel on Breast Cancer Screening. The benefits and harms of breast  
45  
46 19 cancer screening: an independent review. *Lancet* 2012;**380**:1778–86.  
47  
48 20 doi:10.1016/S0140-6736(12)61611-0  
49  
50  
51 21 7 Beral V, Banks E, Bull D, *et al.* Breast cancer and hormone replacement therapy in the  
52  
53 22 Million Women Study. *Lancet* 2003;**362**:419–27. doi:10.1080/13697130400014698  
54  
55  
56  
57  
58  
59  
60

- 1  
2  
3 23 8 Rossouw JE, Anderson GL, Prentice RL, *et al.* Risks and benefits of estrogen plus  
4  
5 24 progestin in healthy postmenopausal women: principal results From the Women's  
6  
7 25 Health Initiative randomized controlled trial. *JAMA* 2002;**288**:321–33.  
8  
9  
10 26 9 Lagerlund M, Drake I, Wirfält E, *et al.* Health-related lifestyle factors and  
11  
12 27 mammography screening attendance in a Swedish cohort study. *Eur J Cancer Prev*  
13  
14 28 2015;**24**:44–50. doi:10.1097/CEJ.0000000000000025  
15  
16  
17 29 10 Ibrayev Y, Oda K, Fraser GE, *et al.* Utilization of prostate cancer screening according  
18  
19 30 to dietary patterns and other demographic variables. The adventist health study-2. *J*  
20  
21 31 *Cancer* 2013;**4**:416–26. doi:10.7150/jca.6442  
22  
23  
24 32 11 Crowe FL, Appleby PN, Travis RC, *et al.* Risk of hospitalization or death from  
25  
26 33 ischemic heart disease among British vegetarians and nonvegetarians: results from the  
27  
28 34 EPIC-Oxford cohort study. *Am J Clin Nutr* 2013;**97**:597–603.  
29  
30 35 doi:10.3945/ajcn.112.044073  
31  
32  
33  
34 36 12 Appleby PN, Crowe FL, Bradbury KE, *et al.* Mortality in vegetarians and comparable  
35  
36 37 nonvegetarians in the United Kingdom. *Am J Clin Nutr* 2016;**103**:218–30.  
37  
38 38 doi:10.3945/ajcn.115.119461  
39  
40  
41 39 13 Alewaeters K, Clarys P, Hebbelinck M, *et al.* Cross-sectional analysis of BMI and  
42  
43 40 some lifestyle variables in Flemish vegetarians compared with non-vegetarians.  
44  
45 41 *Ergonomics* 2005;**48**:1433–44. doi:10.1080/00140130500101031  
46  
47  
48 42 14 Leitzmann C. Vegetarian nutrition: past, present, future 1 – 3. *Am J Clin Nutr*  
49  
50 43 2014;**100**:496S–502S. doi:10.3945/ajcn.113.071365.496S  
51  
52  
53 44 15 Townsend P. *Poverty in the United Kingdom: A Survey of Household Resources and*  
54  
55 45 *Standards of Living*. London, UK: 1979.  
56  
57  
58  
59  
60

- 1  
2  
3 46 16 Herbert A. Is cervical screening working? A cytopathologist's view from the United  
4  
5 47 Kingdom. *Hum Pathol* 1997;**28**:120–6.  
6  
7  
8 48 17 National Health Service. NHS Choices: Breast cancer screening.  
9  
10 49 2015.<http://www.nhs.uk/conditions/breast-cancer-screening/Pages/Introduction.aspx>  
11  
12 50 (accessed 27 Feb2017).  
13  
14  
15 51 18 National Health Service. NHS Choices: Cervical screening.  
16  
17 52 2015.[http://www.nhs.uk/Conditions/Cervical-screening-](http://www.nhs.uk/Conditions/Cervical-screening-test/Pages/Introduction.aspx#main-navigation)  
18  
19 53 [test/Pages/Introduction.aspx#main-navigation](http://www.nhs.uk/Conditions/Cervical-screening-test/Pages/Introduction.aspx#main-navigation) (accessed 27 Feb2017).  
20  
21  
22 54 19 National Health Service. NHS Choices: Prostate Cancer -PSA testing.  
23  
24 55 2015.<http://www.nhs.uk/Conditions/Cancer-of-the-prostate/Pages/Prevention.aspx>  
25  
26 56 (accessed 27 Feb2017).  
27  
28  
29 57 20 Donnelly TT, Al Khater A-H, Al-Bader SB, *et al.* Beliefs and attitudes about breast  
30  
31 58 cancer and screening practices among Arab women living in Qatar: a cross-sectional  
32  
33 59 study. *BMC Womens Health* 2013;**13**:49. doi:10.1186/1472-6874-13-49  
34  
35  
36  
37 60 21 Nijs HGT, Essink-Bot ML, DeKoning HJ, *et al.* Why do men refuse or attend  
38  
39 61 population-based screening for prostate cancer? *J Public Health Med* 2000;**22**:312–6.  
40  
41 62 doi:10.1093/pubmed/22.3.312  
42  
43  
44 63 22 Chan CWH, Yang S, Gu C, *et al.* Perception of Cervical Cancer Risk and Screening  
45  
46 64 Behavior: A Literature Review. *Int J Nurs Knowl* 2014;**26**:2–18. doi:10.1111/2047-  
47  
48 65 3095.12028  
49  
50  
51 66 23 Jensen LF, Mukai TO, Andersen B, *et al.* The association between general  
52  
53 67 practitioners' attitudes towards breast cancer screening and women's screening  
54  
55 68 participation. *BMC Cancer* 2012;**12**:254. doi:10.1186/1471-2407-12-254  
56  
57  
58  
59  
60

- 1  
2  
3 69 24 Jepson RG, Hewison J, Thompson A, *et al.* Patient perspectives on information and  
4  
5 70 choice in cancer screening: A qualitative study in the UK. *Soc Sci Med* 2007;**65**:890–9.  
6  
7 71 doi:10.1016/j.socscimed.2007.04.009  
8  
9  
10 72 25 Scholes S, Faulding S, Mindell J. Use of prescribed medicines. Health Survey for  
11  
12 73 England 2013. 2013.  
13  
14  
15 74 26 Tatham KC, Patel KP. Suitability of common drugs for patients who avoid animal  
16  
17 75 products. *BMJ* 2014;**348**:g401. doi:10.1136/bmj.g401  
18  
19  
20 76 27 Hayes JH, Barry MJ. Screening for Prostate Cancer With the Prostate-Specific Antigen  
21  
22 77 Test. *JAMA* 2014;**311**:1143. doi:10.1001/jama.2014.2085  
23  
24  
25 78 28 Perez-Cornago A, Key TJ, Allen NE, *et al.* Prospective investigation of risk factors for  
26  
27 79 prostate cancer in the UK Biobank cohort study. *Br J Cancer* 2017;:1–10.  
28  
29 80 doi:10.1038/bjc.2017.312  
30  
31  
32  
33 81  
34  
35  
36 82  
37  
38  
39  
40  
41  
42  
43  
44  
45  
46  
47  
48  
49  
50  
51  
52  
53  
54  
55  
56  
57  
58  
59  
60

1  
2  
3 **Supplementary text 1:** List of 36 named medications on the EPIC-Oxford 10 year follow-up  
4 questionnaire.  
5

6 Alendronate, amlodipine, amitriptyline, aspirin, atenolol, atorvastatin, beclomethasone,  
7 bendrofluazide, co-codamol/co-dydramol, contraceptive pill, co-proxamol, diclofenac,  
8 digoxin, enalapril, etidronate, frusemide, HRT, ibuprofen, insulin, lisinopril, lithium,  
9 Losec/Zoton, metformin, nifedipine, paracetamol, paroxetine, prednisolone, propranolol,  
10 Prozac, risedronate, salbutamol, simvastatin, sleeping pills, tamoxifen, thyroxine, warfarin  
11  
12  
13  
14  
15

16 **Supplementary text 2:** List of 29 named medical conditions asked on the EPIC-Oxford 10  
17 year follow-up questionnaire.  
18

19 Cancer (type of cancer), blood clot in leg, blood clot in lung or elsewhere, stroke, transient  
20 ischaemic attack, angina, heart attack, palpitations/irregular heart beat (cardiac arrhythmia),  
21 diabetes, high blood cholesterol, high blood pressure, asthma, emphysema/chronic bronchitis,  
22 thyroid problem, cataract in eye, stomach or duodenal ulcer, bowel polyps, diverticular  
23 disease, Crohn's disease/ulcerative colitis, coeliac disease, osteoporosis, rheumatoid arthritis,  
24 osteoarthritis, depression/anxiety, gallstones, gallbladder removed, epilepsy, multiple  
25 sclerosis, enlarged prostate (men only)  
26  
27  
28  
29  
30  
31  
32  
33  
34  
35  
36  
37  
38  
39  
40  
41  
42  
43  
44  
45  
46  
47  
48  
49  
50  
51  
52  
53  
54  
55  
56  
57  
58  
59  
60

## STROBE Statement—checklist of items that should be included in reports of observational studies

|                              | Item No | Recommendation                                                                                                                                                                                                                                                                                                                                                                                                                                                                                                                                                                                                                                                                                                                     |
|------------------------------|---------|------------------------------------------------------------------------------------------------------------------------------------------------------------------------------------------------------------------------------------------------------------------------------------------------------------------------------------------------------------------------------------------------------------------------------------------------------------------------------------------------------------------------------------------------------------------------------------------------------------------------------------------------------------------------------------------------------------------------------------|
| <b>Title and abstract</b>    | 1       | (a) Indicate the study's design with a commonly used term in the title or the abstract <a href="#">P.1</a><br>(b) Provide in the abstract an informative and balanced summary of what was done and what was found <a href="#">P.2</a>                                                                                                                                                                                                                                                                                                                                                                                                                                                                                              |
| <b>Introduction</b>          |         |                                                                                                                                                                                                                                                                                                                                                                                                                                                                                                                                                                                                                                                                                                                                    |
| Background/rationale         | 2       | Explain the scientific background and rationale for the investigation being reported <a href="#">P.4</a>                                                                                                                                                                                                                                                                                                                                                                                                                                                                                                                                                                                                                           |
| Objectives                   | 3       | State specific objectives, including any prespecified hypotheses <a href="#">P.5 Lines 71-74</a>                                                                                                                                                                                                                                                                                                                                                                                                                                                                                                                                                                                                                                   |
| <b>Methods</b>               |         |                                                                                                                                                                                                                                                                                                                                                                                                                                                                                                                                                                                                                                                                                                                                    |
| Study design                 | 4       | Present key elements of study design early in the paper <a href="#">P.5 Lines 78, P.7 Lines 127-129</a>                                                                                                                                                                                                                                                                                                                                                                                                                                                                                                                                                                                                                            |
| Setting                      | 5       | Describe the setting, locations, and relevant dates, including periods of recruitment, exposure, follow-up, and data collection <a href="#">P.5-7 Lines 77-124</a>                                                                                                                                                                                                                                                                                                                                                                                                                                                                                                                                                                 |
| Participants                 | 6       | (a) <i>Cohort study</i> —Give the eligibility criteria, and the sources and methods of selection of participants. Describe methods of follow-up<br><i>Case-control study</i> —Give the eligibility criteria, and the sources and methods of case ascertainment and control selection. Give the rationale for the choice of cases and controls<br><i>Cross-sectional study</i> —Give the eligibility criteria, and the sources and methods of selection of participants <a href="#">P.5-6 Lines 80-87</a><br>(b) <i>Cohort study</i> —For matched studies, give matching criteria and number of exposed and unexposed<br><i>Case-control study</i> —For matched studies, give matching criteria and the number of controls per case |
| Variables                    | 7       | Clearly define all outcomes, exposures, predictors, potential confounders, and effect modifiers. Give diagnostic criteria, if applicable <a href="#">P.6-9 Lines 98-124, 141-165</a>                                                                                                                                                                                                                                                                                                                                                                                                                                                                                                                                               |
| Data sources/<br>measurement | 8*      | For each variable of interest, give sources of data and details of methods of assessment (measurement). Describe comparability of assessment methods if there is more than one group <a href="#">P.5-7 Lines 81-119</a>                                                                                                                                                                                                                                                                                                                                                                                                                                                                                                            |
| Bias                         | 9       | Describe any efforts to address potential sources of bias <a href="#">P.7-8 Lines 133-140</a>                                                                                                                                                                                                                                                                                                                                                                                                                                                                                                                                                                                                                                      |
| Study size                   | 10      | Explain how the study size was arrived at <a href="#">P.5 Lines 82-87, P.9 Lines 169-171</a>                                                                                                                                                                                                                                                                                                                                                                                                                                                                                                                                                                                                                                       |
| Quantitative variables       | 11      | Explain how quantitative variables were handled in the analyses. If applicable, describe which groupings were chosen and why <a href="#">P.8-9 Lines 144-164</a>                                                                                                                                                                                                                                                                                                                                                                                                                                                                                                                                                                   |
| Statistical methods          | 12      | (a) Describe all statistical methods, including those used to control for confounding <a href="#">P.7-9 Lines 126-165</a><br>(b) Describe any methods used to examine subgroups and interactions <a href="#">P.8 Lines 159-160</a><br>(c) Explain how missing data were addressed <a href="#">P.8-9 Lines 148, 158, 160-164</a><br>(d) <i>Cohort study</i> —If applicable, explain how loss to follow-up was addressed<br><i>Case-control study</i> —If applicable, explain how matching of cases and controls was addressed<br><i>Cross-sectional study</i> —If applicable, describe analytical methods taking account of sampling strategy <a href="#">P.7 Lines 127-129</a>                                                     |

(e) Describe any sensitivity analyses P.8-9 Lines 159-164

Continued on next page

For peer review only



**Results**

|                  |     |                                                                                                                                                                                                                                                                                                                                                                                                                                                 |
|------------------|-----|-------------------------------------------------------------------------------------------------------------------------------------------------------------------------------------------------------------------------------------------------------------------------------------------------------------------------------------------------------------------------------------------------------------------------------------------------|
| Participants     | 13* | (a) Report numbers of individuals at each stage of study—eg numbers potentially eligible, examined for eligibility, confirmed eligible, included in the study, completing follow-up, and analysed <a href="#">P.9 Lines 169-174</a><br>(b) Give reasons for non-participation at each stage <a href="#">P.9 Lines 169-174</a><br>(c) Consider use of a flow diagram                                                                             |
| Descriptive data | 14* | (a) Give characteristics of study participants (eg demographic, clinical, social) and information on exposures and potential confounders <a href="#">P.9 Lines 175-177, Table 1</a><br>(b) Indicate number of participants with missing data for each variable of interest <a href="#">P.9 Lines 171-174, 180-181</a><br>(c) <i>Cohort study</i> —Summarise follow-up time (eg, average and total amount)                                       |
| Outcome data     | 15* | <i>Cohort study</i> —Report numbers of outcome events or summary measures over time<br><i>Case-control study</i> —Report numbers in each exposure category, or summary measures of exposure<br><i>Cross-sectional study</i> —Report numbers of outcome events or summary measures <a href="#">P.9-10, Table 2-5</a>                                                                                                                             |
| Main results     | 16  | (a) Give unadjusted estimates and, if applicable, confounder-adjusted estimates and their precision (eg, 95% confidence interval). Make clear which confounders were adjusted for and why they were included <a href="#">P.9-10, Table 2-5</a><br>(b) Report category boundaries when continuous variables were categorized<br>(c) If relevant, consider translating estimates of relative risk into absolute risk for a meaningful time period |
| Other analyses   | 17  | Report other analyses done—eg analyses of subgroups and interactions, and sensitivity analyses <a href="#">P.10 Lines 201-204</a>                                                                                                                                                                                                                                                                                                               |

**Discussion**

|                  |    |                                                                                                                                                                                                    |
|------------------|----|----------------------------------------------------------------------------------------------------------------------------------------------------------------------------------------------------|
| Key results      | 18 | Summarise key results with reference to study objectives <a href="#">P.11 Lines 208-217</a>                                                                                                        |
| Limitations      | 19 | Discuss limitations of the study, taking into account sources of potential bias or imprecision. Discuss both direction and magnitude of any potential bias <a href="#">P.15 Lines 317-326</a>      |
| Interpretation   | 20 | Give a cautious overall interpretation of results considering objectives, limitations, multiplicity of analyses, results from similar studies, and other relevant evidence <a href="#">P.12-15</a> |
| Generalisability | 21 | Discuss the generalisability (external validity) of the study results <a href="#">P.11-12, P.15 Lines 322-326</a>                                                                                  |

**Other information**

|         |    |                                                                                                                                                                                                    |
|---------|----|----------------------------------------------------------------------------------------------------------------------------------------------------------------------------------------------------|
| Funding | 22 | Give the source of funding and the role of the funders for the present study and, if applicable, for the original study on which the present article is based ) <a href="#">P.16 Lines 341-343</a> |
|---------|----|----------------------------------------------------------------------------------------------------------------------------------------------------------------------------------------------------|

\*Give information separately for cases and controls in case-control studies and, if applicable, for exposed and unexposed groups in cohort and cross-sectional studies.

**Note:** An Explanation and Elaboration article discusses each checklist item and gives methodological background and published examples of transparent reporting. The STROBE checklist is best used in conjunction with this article (freely available on the Web sites of PLoS Medicine at <http://www.plosmedicine.org/>, Annals of Internal Medicine at <http://www.annals.org/>, and Epidemiology at <http://www.epidem.com/>). Information on the STROBE Initiative is available at [www.strobe-statement.org](http://www.strobe-statement.org).

# BMJ Open

## Cross-sectional analyses of participation in cancer screening and use of hormone replacement therapy and medications in meat eaters and vegetarians: the EPIC-Oxford study.

|                                 |                                                                                                                                                                                                                                               |
|---------------------------------|-----------------------------------------------------------------------------------------------------------------------------------------------------------------------------------------------------------------------------------------------|
| Journal:                        | <i>BMJ Open</i>                                                                                                                                                                                                                               |
| Manuscript ID                   | bmjopen-2017-018245.R2                                                                                                                                                                                                                        |
| Article Type:                   | Research                                                                                                                                                                                                                                      |
| Date Submitted by the Author:   | 20-Nov-2017                                                                                                                                                                                                                                   |
| Complete List of Authors:       | Tong, Tammy Yin Ni; Cancer Epidemiology Unit, Appleby, P; Cancer Epidemiology Unit, University of Oxford<br>Bradbury, Kathryn; Cancer Epidemiology Unit, University of Oxford<br>Key, Timothy; Cancer Epidemiology Unit, University of Oxford |
| <b>Primary Subject Heading</b>: | Epidemiology                                                                                                                                                                                                                                  |
| Secondary Subject Heading:      | Nutrition and metabolism, Oncology                                                                                                                                                                                                            |
| Keywords:                       | NUTRITION & DIETETICS, ONCOLOGY, HEALTH SERVICES ADMINISTRATION & MANAGEMENT                                                                                                                                                                  |
|                                 |                                                                                                                                                                                                                                               |

SCHOLARONE™  
Manuscripts

1  
2  
3 1 **Cross-sectional analyses of participation in cancer screening and use of hormone**  
4  
5 2 **replacement therapy and medications in meat eaters and vegetarians: the EPIC-Oxford**  
6  
7 3 **study.**  
8  
9

10 4 Tammy Y.N. Tong<sup>1</sup>, Paul N. Appleby<sup>1</sup>, Kathryn E. Bradbury<sup>1</sup>, Timothy J. Key<sup>1</sup>  
11  
12  
13 5

14  
15  
16 6 1. Cancer Epidemiology Unit, Nuffield Department of Population Health, University of  
17  
18 7 Oxford, UK  
19  
20  
21 8

22  
23  
24 9 Corresponding author: Tammy Y.N. Tong  
25  
26

27 10 Postal address: Cancer Epidemiology Unit, University of Oxford, Richard Doll Building, Old  
28  
29 11 Road Campus, Oxford, OX3 7LF  
30  
31

32 12 Tel: +44 (0) 1865 289653  
33  
34

35 13 Email: tammy.tong@ceu.ox.ac.uk  
36  
37

38 14  
39  
40

41 15 Word count: 3657 words  
42  
43

44 16  
45  
46

47 17 Keywords: vegetarians; cancer screening; hormone replacement therapy; medication use  
48  
49  
50  
51  
52  
53  
54  
55  
56  
57

1  
2  
3 18 **ABSTRACT**  
4  
5

6 19 **Objectives:** To examine differences in health-related behaviours such as screening or testing  
7  
8 20 for cancer, use of hormone replacement therapy (HRT), and use of other medications in  
9  
10 21 different diet groups.

11  
12  
13 22 **Design:** We studied 31,260 participants across four diet groups (18,155 meat eaters, 5,012  
14  
15 23 fish eaters, 7,179 vegetarians, 914 vegans) in the UK EPIC-Oxford cohort. Information was  
16  
17 24 collected in 5 (around 2000-2003) or 10 (around 2007) year follow-up questionnaires  
18  
19 25 regarding participation in breast screening, cervical screening, prostate specific antigen (PSA)  
20  
21 26 testing, use of HRT, and use of medications for the past four weeks. Using Poisson  
22  
23 27 regression, we estimated the prevalence ratios (PR) for each behaviour across people of  
24  
25 28 different diet groups, using meat-eaters as the reference group.

26  
27  
28  
29 29 **Results:** Compared with meat-eaters, vegetarian (PR; 95% confidence interval: 0.94; 0.89,  
30  
31 30 0.98) and vegan (0.82; 0.71, 0.95) women reported lower participation in breast screening,  
32  
33 31 and vegetarian men were less likely to report PSA testing (0.82; 0.71, 0.96). No differences  
34  
35 32 were observed among women for cervical screening. In women, all non-meat eating groups  
36  
37 33 reported lower use of HRT compared with meat-eaters ( $p$  heterogeneity $<0.0001$ ). Lower  
38  
39 34 reported use of any medication was observed for participants in all non-meat eating groups  
40  
41 35 with no ( $p<0.0001$ ) or one ( $p=0.0002$ ) self-reported illness. No heterogeneity was observed  
42  
43 36 across the diet groups for the reported use of specific medication for high blood pressure,  
44  
45 37 high blood cholesterol, asthma, diabetes, and thyroid disease.

46  
47  
48  
49 38 **Conclusions:** Differences in self-reported breast screening, PSA testing, HRT use and overall  
50  
51 39 medication use were observed across the diet groups. Whether such differences contribute to  
52  
53 40 differential long-term disease risks requires further study.  
54  
55  
56  
57  
58  
59  
60

**Strengths and limitations of this study**

- This study is the first to simultaneously examine the reported uptake of breast and cervical cancer screening, prostate specific antigen testing, hormone replacement therapy (HRT) use and medication use in different diet groups.
- The study includes a large number of participants recruited from across different regions in the United Kingdom, with a high proportion of fish eaters, vegetarians, and vegans.
- Recall bias is possible because assessment of cancer screening or testing, HRT use and medication use was based on self-report, although there is no indication that such misclassification bias should differ by diet group.
- The study is cross-sectional and we cannot infer causality.

41

## 42 INTRODUCTION

43 People of different habitual diet groups have been shown to have different health  
44 characteristics. Compared to meat eaters, vegetarians generally have lower BMI, blood  
45 pressure, and circulating low density lipoprotein cholesterol levels [1–3], characteristics  
46 likely to reduce disease risk. However, evidence on the long-term risk of many non-  
47 communicable diseases across people of different diet groups is limited.

48 For cancer risk, both a United Kingdom (UK) [4] and a United States (US) [5] study reported  
49 lower risk of overall cancer incidence with a vegetarian diet. Because health related  
50 behaviours, such as participation in cancer screening [6] or use of hormone replacement  
51 therapy (HRT) [7,8], may contribute to the observed rates of cancer, the presence of any  
52 differences in these behaviours between diet groups in different populations deserve further  
53 investigation. Results from a Swedish cohort [9] and a US cohort [10] showed that  
54 vegetarians (including vegans and people who ate fish but not meat) had lower odds of  
55 attending breast screening and prostate cancer screening respectively, when compared with  
56 meat eaters, and vegetarians also had lower use of HRT compared with non-vegetarians [5].

57 For cardiovascular diseases, vegetarians in EPIC-Oxford have been observed to have lower  
58 ischaemic heart disease risk (hospitalization and death combined) [11], but no significant  
59 difference in ischaemic heart disease mortality was observed between diet groups in the same  
60 population [12]. The reason for this apparent difference between incidence and mortality is  
61 unclear. One possible explanation could be the differential use of appropriate medications in  
62 the different diet groups, which subsequently influences disease mortality. In a Belgian  
63 population for example, vegetarians had lower use of prescription medications compared to  
64 non-vegetarians, but similar use of non-prescription drugs [13].

1  
2  
3 65 The increasing popularity and interest in vegetarian diets [14] prompts research on the long-  
4  
5 66 term health of vegetarians and vegans. Because health behaviour such as screening or  
6  
7 67 medication use may ultimately influence disease risk, the understanding of any differences in  
8  
9 68 these behaviours by diet group is crucial for the appropriate appraisal of possible differences  
10  
11 69 in disease risk between diet groups. However, current knowledge on this topic is insufficient,  
12  
13 70 because literature on participation in screening and use of medication across people of  
14  
15 71 different diet groups is scarce. Therefore, the aim of this study was to assess some of these  
16  
17 72 relevant health behaviours, including participation in cancer screening or testing, and use of  
18  
19 73 HRT and other medications among people of different diet groups, in a large population-  
20  
21 74 based cohort in the UK with a high percentage of vegetarians.  
22  
23  
24  
25  
26  
27

## 28 76 **METHODS**

### 31 77 **Study population**

34 78 The EPIC-Oxford study is a UK based cohort recruited between 1993 and 1999. The study  
35  
36 79 protocol was approved by a Multicentre Research Ethics Committee (Scotland A Research  
37  
38 80 Ethics Committee) and participants gave written informed consent. Details of the recruitment  
39  
40 81 process have been described previously [1]. In brief, a combination of general practitioner  
41  
42 82 (GP) recruitment and postal recruitment was used. The GP recruitment invited men and  
43  
44 83 women aged 35 to 59 years registered with participating GPs and recruited 7,421 participants.  
45  
46 84 The postal recruitment was targeted at vegetarians, vegans, and other people interested in diet  
47  
48 85 and health, by contacting members of The Vegetarian Society, The Vegan Society, and via  
49  
50 86 leaflets enclosed in vegetarian and health food magazines and displayed in health-food shops,  
51  
52 87 and recruited 57,990 participants aged  $\geq 20$  years. Altogether, 57,443 participants completed a  
53  
54 88 full recruitment questionnaire which asked about their personal details (including postcode to  
55  
56  
57  
58  
59  
60

1  
2  
3 89 which a Townsend index of area-level deprivation was assigned [15]), habitual diet and other  
4  
5 90 health and lifestyle characteristics, including personal and family medical history, medication  
6  
7 91 use, socio-economic characteristics, smoking and drinking behaviour, and physical activity  
8  
9 92 levels. A follow-up questionnaire was sent to surviving participants approximately 5 years  
10  
11 93 after recruitment (mostly from 2000 to 2003), and a second follow-up questionnaire was  
12  
13 94 mailed approximately 10 years after recruitment (mostly in 2007). In the follow-up  
14  
15 95 questionnaires, updated information was gathered on diet, health and lifestyle, including self-  
16  
17 96 reported current health. Due to the changing research focus over the course of data collection,  
18  
19 97 slight variations existed between questions asked on the 5 and 10 year follow-up  
20  
21 98 questionnaires.  
22  
23  
24  
25  
26  
27

### 28 100 **Assessment of diet group**

29  
30  
31 101 In the recruitment questionnaire and each subsequent follow-up questionnaire, four questions  
32  
33 102 were asked regarding consumption of meat, fish, dairy products, and eggs, in the form of “Do  
34  
35 103 you eat any meat?” or similar for the other three food groups. Responses to these questions  
36  
37 104 were used to assign participants to one of four diet groups at each time point: meat eaters  
38  
39 105 (participants who ate meat, irrespective of whether they ate fish, dairy products or eggs); fish  
40  
41 106 eaters (participants who did not eat meat but did eat fish); vegetarians (participants who did  
42  
43 107 not eat meat or fish, but did eat one or both of dairy products and eggs), and vegans  
44  
45 108 (participants who did not eat meat, fish, dairy products, or eggs).  
46  
47  
48  
49  
50  
51  
52  
53  
54  
55  
56  
57  
58  
59  
60



## 110 **Assessment of participation in screening, HRT and medication use**

111 In the follow-up questionnaires, women were asked if they had ever had a breast screening by  
112 mammography, cervical screening by the smear test (only on the 5 year follow-up  
113 questionnaire), or used HRT, and men were asked if they had ever had a prostate specific  
114 antigen (PSA) test (only on the 10 year follow-up questionnaire). On the 10 year follow-up  
115 questionnaire, all participants were asked if they had used any medication for most of the last  
116 four weeks, with 36 named medications and a free text field for reporting regular use of any  
117 medication not on the list; participants were also asked if they had been diagnosed with any  
118 of a list of 29 medical conditions, and the year when the condition was first diagnosed. The  
119 full list of the 36 medications and 29 medical conditions is given in Supplementary text 1 and  
120 2. The corresponding question on medication use on the 5 year questionnaire was shorter,  
121 with 20 named medications and 26 medical conditions.

122 For assessment of specific medication use, five common medical conditions associated with  
123 specific medications were identified: high blood pressure (commonly treated with one or  
124 more of amlodipine, enalapril, frusemide, propranolol, atenolol, bendrofluzide, lisinopril and  
125 nifedipine), high blood cholesterol (atorvastatin and simvastatin), asthma (beclomethasone  
126 and salbutamol), diabetes (insulin and metformin), and thyroid disease (thyroxine).

127

## 128 **Statistical analyses**

129 Information on assignment to diet group and assessment of health behaviour from the 10 year  
130 follow-up questionnaire was used for our analyses, except for the assessment of participation  
131 in cervical screening which was only asked on the 5 year follow-up questionnaire.  
132 Participants were excluded from all analysis if they did not answer the relevant questions to

1  
2  
3 133 be assigned to an appropriate diet group (n=28), and in order to ensure that an overlapping  
4  
5 134 population was used for the analyses of all outcomes, they were also excluded if they did not  
6  
7 135 answer the relevant question on medication use (n=407). For the analyses related to  
8  
9 136 participation in breast screening, cervical screening, PSA testing or HRT use, only women or  
10  
11 137 men who answered the relevant question and were in the specified age group at questionnaire  
12  
13 138 completion were included. The age group specifications were as follows: age 50 to 74 years  
14  
15 139 for breast screening, age 25 to 74 years for cervical screening, age 50 to 84 years for PSA  
16  
17 140 testing, and age 50 to 74 years for HRT use. For HRT use, we further restricted the analysis  
18  
19 141 to post-menopausal women, determined by including only participants who answered yes to  
20  
21 142 the question 'Have you been through your menopause?' on the follow-up questionnaire.  
22  
23  
24

25 143 For each analysis, we used Poisson regression to estimate prevalence ratios (95% confidence  
26  
27 144 intervals, CI) of cancer screening or testing (breast screening, cervical screening, PSA  
28  
29 145 testing), HRT use, or medication use in different diet groups, using meat eaters as the  
30  
31 146 reference group. For analyses of cancer screening or testing and use of HRT, we adjusted for  
32  
33 147 age at follow-up (<40, 40-44, 45-49, 50-54, 55-59, 60-64, 65-69, 70-74,  $\geq 75$  years as  
34  
35 148 appropriate for the age range included in the analysis), region of recruitment (eight  
36  
37 149 geographical regions across the UK), and self-reported current health (excellent, good, fair,  
38  
39 150 poor, unknown). For analyses of any medication use, we adjusted for the cross-stratification  
40  
41 151 of sex and age at follow-up, region of recruitment, self-reported current health, and the  
42  
43 152 number of self-reported illnesses or conditions (0, 1, 2, 3,  $\geq 4$ ). To further assess whether any  
44  
45 153 variation in medication use by diet group varied by health status, we repeated the analyses  
46  
47 154 stratified by the number of self-reported illnesses or conditions using the above  
48  
49 155 categorisation. Subsequently, for each of high blood pressure, high blood cholesterol, asthma,  
50  
51 156 diabetes, and thyroid disease, we estimated the prevalence ratios of taking appropriate  
52  
53 157 medication by diet group among people diagnosed with each condition in turn, adjusting for  
54  
55  
56  
57  
58  
59  
60

1  
2  
3 158 covariates as above and additionally for years since reported diagnosis, calculated as year of  
4  
5 159 follow-up questionnaire completion minus reported year of diagnosis (<2, 2-3, 4-5, 6-9, ≥10  
6  
7 160 years, unknown).  
8  
9

10 161 As sensitivity analyses, we repeated the analyses as follows: using data from the 5 year  
11  
12 162 follow-up questionnaire where available; and further adjusting for smoking status (never,  
13  
14 163 former, current, unknown), alcohol consumption (<1 g/day, 1-7 g/day, 8-15 g/day, ≥16  
15  
16 164 g/day), Townsend index of area-level deprivation (quartiles and unknown), and education  
17  
18 165 level (no qualifications, basic secondary e.g. O level, higher secondary e.g. A level, degree,  
19  
20 166 unknown). All statistical analyses were performed using Stata release 14.1 (StataCorp), and *P*  
21  
22 167 values < 0.05 were considered statistically significant.  
23  
24  
25  
26 168

## 29 169 **RESULTS**

### 32 170 **Cohort characteristics**

33  
34  
35 171 Overall, 57,443 participants in EPIC-Oxford cohort completed a full recruitment  
36  
37 172 questionnaire, of whom 38,043 (66%) completed the 5 year follow-up questionnaire, and  
38  
39 173 31,695 (55%) completed the 10 year follow-up questionnaire. After excluding participants  
40  
41 174 who did not answer the relevant questions on diet group or on medication use, data for 31,260  
42  
43 175 participants who completed the 10 year follow-up questionnaire (18,155 meat eaters, 5,012  
44  
45 176 fish eaters, 7,179 vegetarians, and 914 vegans) were used for most of the analyses.  
46  
47 177 Characteristics of the participants are presented in **Table 1**. Overall, non-meat eaters were  
48  
49 178 younger, more likely to report having excellent health, less likely to report taking medication  
50  
51 179 in the past four weeks, and less likely to have reported any illnesses or conditions.  
52  
53  
54

55 180  
56  
57  
58  
59  
60

## 181 **Participation in screening and use of HRT and medications**

182 Overall, 14,016 women were included in the analyses for breast screening, 27,781 women for  
183 cervical screening, and 4,783 men for PSA testing (**Table 2**). In women, compared with meat  
184 eaters, vegetarians (prevalence ratio; 95% CI: 0.94; 0.89, 0.98) and vegans (0.82; 0.71, 0.95),  
185 but not fish eaters (0.96; 0.92, 1.01) had lower reported attendance of breast screening, but no  
186 significant heterogeneity was observed between the diet groups for reported participation in  
187 cervical screening ( $P$ -heterogeneity=0.37). In men, vegetarians had lower reported uptake of  
188 PSA testing (0.82; 0.71, 0.96) than meat eaters, while the difference in uptake appeared lower  
189 but did not reach statistical significance in vegans (0.72; 0.50, 1.02), and was not  
190 significantly different in fish eaters (0.99; 0.85, 1.07). For HRT use, women who were non-  
191 meat eaters reported lower use (fish eaters: 0.80; 0.73, 0.88; vegetarians: 0.74; 0.68, 0.81;  
192 vegans: 0.42; 0.30, 0.60) compared with women who were meat eaters (**Table 3**).

193 Irrespective of the number of self-reported illnesses and conditions, non-meat eaters reported  
194 lower use of any medication (fish eaters: 0.92; 0.87, 0.96; vegetarians: 0.93; 0.89, 0.98;  
195 vegans 0.71; 0.63, 0.81) compared with meat eaters (**Table 4**). When the analyses were  
196 stratified by the number of self-reported illnesses or conditions, non-meat eaters with no  
197 ( $P<0.0001$ ) or one ( $P=0.0002$ ) illness or condition reported lower medication use compared  
198 with meat eaters, but the association was attenuated and no longer statistically significant  
199 among participants with two, three, or four or more illnesses or conditions. For medication  
200 use specific to several common illnesses and conditions, no significant differences were  
201 observed between the diet groups in the reported use of appropriate medications for high  
202 blood pressure, high blood cholesterol, asthma, diabetes, or thyroid disease, among  
203 participants diagnosed with each of these conditions (**Table 5**). Results were consistent when  
204 we repeated the analyses where possible using data from the 5 year follow-up questionnaire,

1  
2  
3 205 or when we further adjusted for smoking, alcohol consumption, Townsend deprivation index,  
4  
5 206 and education level (Supplementary table 1).  
6  
7

8 207  
9

## 10 208 **DISCUSSION**

### 13 209 **Summary of results**

14  
15  
16 210 In this UK population-based cohort with a large proportion of participants from different diet  
17  
18 211 groups, we generally observed lower participation in breast screening and lower HRT use  
19  
20 212 among women who were non-meat eaters (separately categorised as fish eaters, vegetarians,  
21  
22 213 and vegans) compared with women who were meat eaters. Vegetarian men had lower  
23  
24 214 participation in PSA testing compared with meat eating men, but no significant difference  
25  
26 215 was observed for cervical screening in women across the diet groups. For medication use,  
27  
28 216 non-meat eaters were less likely to report taking medications than meat eaters overall, but  
29  
30 217 there were no significant differences in medication use among people reporting two or more  
31  
32 218 illnesses or conditions, or for people reporting taking specific medications for various self-  
33  
34 219 reported conditions.  
35  
36  
37  
38

39 220  
40  
41

### 42 221 **Comparison with other studies**

43  
44  
45 222 Few studies have reported on the participation in cancer screening or testing, HRT use or  
46  
47 223 medication use among people of different diet groups, and no study has assessed all these  
48  
49 224 behaviours simultaneously in the same cohort. For breast cancer screening, consistent with  
50  
51 225 our findings, the Swedish Malmö Diet and Cancer Study reported that non-attendance for  
52  
53 226 breast cancer screening was more likely in people who were vegetarians or vegans (odds ratio  
54  
55 227 or OR; 95% confidence interval: 1.49; 1.11, 1.99) [9]. Analyses of data from the Adventist  
56  
57  
58  
59  
60

1  
2  
3 228 Health Study-2 in the United States and Canada showed that all non-meat eaters were less  
4  
5 229 likely to report PSA testing compared with meat eaters (0.79; 0.66, 0.95 for fish eaters; 0.76;  
6  
7 230 0.67, 0.86 for vegetarians; and OR 0.50; 0.42, 0.60 for vegans) [10], whereas we only  
8  
9 231 observed a lower reported uptake among the vegetarians but not the fish eaters (nor the  
10  
11 232 vegans, perhaps because of limited numbers) compared with meat eaters in EPIC-Oxford.  
12  
13 233 However, given the much higher rates of PSA testing in the Adventist Health Study-2 (73.3%  
14  
15 234 versus 31.5% in EPIC-Oxford), attitudes towards screening are likely to be different in the  
16  
17 235 two populations, and therefore the results might not be directly comparable. Similar to our  
18  
19 236 study, the Adventist Health Study-2 also reported lower ever use of HRT (adjusted for age  
20  
21 237 and race) in pesco-vegetarians (21.0%) and lacto-vegetarians (20.4%), and the lowest use in  
22  
23 238 vegans (16.2%), when compared with non-vegetarians (22.4%) [5].  
24  
25  
26

27 239 For medication use, a cross-sectional study in a Belgian population reported lower use of  
28  
29 240 prescribed medications when comparing vegetarians to a reference Belgian population  
30  
31 241 (25.5% versus 47.3%,  $p < 0.001$ ) [13]. While this is consistent with our findings on overall  
32  
33 242 medication use, the study did not assess the use of medications stratified by the number of  
34  
35 243 illnesses, nor did they assess appropriate medication use for specific medical conditions. No  
36  
37 244 studies were found which examined participation of cervical screening among people of  
38  
39 245 different diet groups.  
40  
41  
42

43 246  
44  
45

#### 46 247 **Interpretation of findings and implications**

47  
48

49 248 Our findings indicate differences in some health related behaviours between people of  
50  
51 249 different diet groups, although the reasons behind such differences are unclear. For the  
52  
53 250 observed differences in screening rates, possible explanations could be related to different  
54  
55 251 attitudes towards the screening programmes. In the UK since 1988 [6,16], all women aged 50  
56  
57  
58  
59  
60

1  
2  
3 252 to 70 are invited to attend breast cancer screening clinics [17] and all women aged 25 to 64  
4  
5 253 are invited for cervical screening [18] at regular intervals. On the other hand, there is no  
6  
7 254 national programme for PSA testing, although men over the age of 50 are eligible to arrange  
8  
9 255 for testing via their GP if they wish [19]. In studies which assessed attitudes towards cancer  
10  
11 256 screening or testing, common reasons which affect people's participation in screening include  
12  
13 257 their education level and knowledge of the procedure, recommendation by their doctor, fear  
14  
15 258 of the procedure or the outcome, or their perceived risk of cancer [20–23]. If vegetarians and  
16  
17 259 vegans felt their diets or lifestyles were protective against cancer for example, they might be  
18  
19 260 more likely to forgo cancer screening as a result of lower perceived risk. However, no  
20  
21 261 information was found on whether or how such attitudes may vary by diet group.  
22  
23  
24

25 262 In a small focus group study in Scotland which asked participants about their attitudes  
26  
27 263 towards cancer screening (n=31 for cervical screening, n=10 for breast screening), the study  
28  
29 264 participants reported that they felt pressure from health care professionals, family and friends  
30  
31 265 to attend cervical screening but not breast screening, and that they also considered cervical  
32  
33 266 screening to be normative routine behaviour [24]. Such differences in attitudes towards breast  
34  
35 267 screening and cervical screening are of interest, as this may help to explain the differences we  
36  
37 268 observed in participation for breast screening but not cervical screening, if the latter was  
38  
39 269 considered routine behaviour. However, relevant evidence is lacking, and both dietary and  
40  
41 270 non-dietary factors which are associated with attendance for either breast screening or PSA  
42  
43 271 testing deserve further study.  
44  
45  
46

47 272 Reasons for the observed lower prevalence of HRT use and medication use among people of  
48  
49 273 different diet groups are also unclear. The prevalence of medication use in meat eaters (56%)  
50  
51 274 in EPIC-Oxford was slightly higher than the UK average of 43% of men and 50% of women  
52  
53 275 aged 16 or above who reported taking at least one prescribed medicine in the last week [25],  
54  
55 276 confirming the relatively low prevalence of medication use in the vegetarians (39%) and  
56  
57  
58

1  
2  
3 277 vegans (28%). However, given the differences in age ranges and possible differences in  
4  
5 278 medications accounted for, strict comparisons cannot be made. Because lower reported use of  
6  
7 279 medications was observed even in people with no (especially) or only one reported illness or  
8  
9 280 condition, better health among non-meat eaters is unlikely to be the only, or a sufficient  
10  
11 281 explanation for the differences. Non-meat eaters may also be reluctant to take medications  
12  
13 282 which are likely to contain animal-derived products [26], or may prefer to use homoeopathic  
14  
15 283 medications [13] or other alternative therapies. Since information on medication use in this  
16  
17 284 study was based on a pre-specified list from the follow-up questionnaire, it was not possible  
18  
19 285 to assess the use of alternative therapies or any other named medications, despite their  
20  
21 286 possible contributions to prevalence of overall medication use.

22  
23  
24  
25 287 Differential participation in screening for breast or prostate cancer, use of HRT, and use of  
26  
27 288 medications for people of distinct diet groups may ultimately lead to differences in disease  
28  
29 289 incidence or prognosis due to possible detection bias and differential post diagnosis  
30  
31 290 treatment. For example, breast cancer screening results in higher incidence but reduced  
32  
33 291 mortality from breast cancer among those who are screened [6]. Prostate cancer testing is also  
34  
35 292 linked to increased incidence in those who are tested [27,28]. Therefore, using breast cancer  
36  
37 293 as an example, given the lower rates of breast cancer screening among non-meat eating  
38  
39 294 women both in EPIC-Oxford and in the Swedish Malmö Diet and Cancer Study [9], it is  
40  
41 295 possible that the observed incidence of breast cancer in these diet groups underestimates the  
42  
43 296 true incidence owing to detection bias, but that ultimately these women would be expected to  
44  
45 297 have a somewhat higher mortality from breast cancer. Therefore, future work on assessing  
46  
47 298 breast cancer risk in people of different diet groups should take into account any differences  
48  
49 299 in screening rates between diet groups.

50  
51  
52  
53  
54 300 Similarly, it is not clear why there was differential use of HRT in the four diet groups, for  
55  
56 301 example whether it was because non-meat eaters were less likely to have symptoms, or



1  
2  
3 302 because they were less likely to seek treatment when symptoms appear. Regardless of the  
4  
5 303 underlying reason, the observed lower reported use of HRT among non-meat eating women  
6  
7 304 deserves attention, because use of HRT may confound any observed associations between  
8  
9 305 diet group and breast cancer, given that HRT preparations containing oestrogens and  
10  
11 306 progestogens have been shown to increase the risk of breast cancer [7,8].  
12  
13

14 307 Overall, our findings showed some differences in health related behaviours between people  
15  
16 308 of different diet groups, thereby highlighting the need to consider such differences when  
17  
18 309 conducting longitudinal analyses in these populations. Future work should also consider  
19  
20 310 possible differences in other health behaviours between diet groups, such as attendance of  
21  
22 311 colorectal screening. Further study is warranted to understand why people of different diet  
23  
24 312 groups have differential participation in breast screening or prostate cancer testing, HRT use,  
25  
26 313 and overall medication use, whether these differences vary by reasons for adhering to each  
27  
28 314 diet group, and whether or how these differences are related to future disease risk.  
29  
30  
31

32 315  
33  
34

### 35 316 **Strengths and limitations**

36  
37

38 317 This study is the first to simultaneously examine participation in cancer screening or testing,  
39  
40 318 HRT use and medication use in different diet groups. A strength of the study is the large  
41  
42 319 sample size recruited from across different regions in the UK. Additionally, information was  
43  
44 320 collected on a range of factors which may also be associated with the behaviours of interest,  
45  
46 321 allowing adjustment for these factors. Of potential limitations, recall bias is possible because  
47  
48 322 assessment of the behaviours of interest (i.e. breast screening, PSA testing, HRT use and  
49  
50 323 overall medication use) as well as existing medical conditions was based on self-report,  
51  
52 324 although there is no indication that such misclassification bias should differ by diet group.  
53  
54  
55 325 The reasons for which people adhered to each diet group were not recorded, although such  
56  
57  
58  
59  
60

1  
2  
3 326 reasons may be relevant to the other health behaviours studied. Because of the relatively  
4  
5 327 small number of vegans in our study sample, the role of chance in explaining the findings  
6  
7 328 relating to this diet group, especially subgroup analyses related to medication use, cannot be  
8  
9 329 ruled out. As with most population cohorts, some degree of self-selection and healthy cohort  
10  
11 330 bias may also be present.

12  
13  
14 331

## 15 16 17 332 **CONCLUSIONS**

18  
19  
20 333 In this population, we observed differences in breast screening, PSA testing, HRT use and  
21  
22 334 overall medication use between meat eaters, fish eaters, vegetarians and vegans, but no  
23  
24 335 significant differences between diet groups for cervical screening, or medication use in  
25  
26 336 people with two or more illnesses or for specific conditions. The reasons for these differences  
27  
28 337 require further investigation. Nonetheless, such differences may be related to or could  
29  
30 338 confound any differences in observed morbidity or mortality from cancer and other diseases  
31  
32 339 between people of different diet groups, and therefore should be considered in future  
33  
34 340 epidemiological studies.

35  
36  
37  
38 341

## 39 40 41 342 **STATEMENTS**

### 42 43 44 343 **Acknowledgements**

45  
46  
47 344 We thank all participants in the EPIC-Oxford cohort for their invaluable contribution. The  
48  
49 345 work is supported by the UK Medical Research Council MR/M012190/1 and Cancer  
50  
51 346 Research UK 570/A16491 and C9221/A19170. KEB is supported by the Girdlers' New  
52  
53 347 Zealand Health Research Council Fellowship. TJK is a member of the Vegan Society; the  
54  
55 348 other authors had no conflicts of interest.

1  
2  
3 3494  
5  
6 350 **Availability of data and materials**7  
8  
9 351 The data access policy for EPIC-Oxford is available via the study website (<http://www.epic-oxford.org/data-access-sharing-and-collaboration/>).  
10  
11 35212  
13  
14 35315  
16  
17 354 **Author's contributions**18  
19 355 TYNT, PNA, and TJK conceived and designed the research question. TYNT and PNA  
20  
21 356 analysed the data. TYNT wrote the first draft of the manuscript, and PNA, KEB and TJK  
22  
23 357 provided input on data analysis and interpretation of results. All authors revised the  
24  
25 358 manuscript critically for important intellectual content, and read and approved the final  
26  
27  
28 359 manuscript.  
29  
30  
31  
32  
33  
34  
35  
36  
37  
38  
39  
40  
41  
42  
43  
44  
45  
46  
47  
48  
49  
50  
51  
52  
53  
54  
55  
56  
57  
58  
59  
60

Table 1 Characteristics by diet group of participants in the EPIC-Oxford study who completed the second follow-up questionnaire (n=31260)<sup>1</sup>.

| Characteristic                                       | Meat eaters  | Fish eaters | Vegetarians | Vegans      | Total        |
|------------------------------------------------------|--------------|-------------|-------------|-------------|--------------|
| Number of participants (% female)                    | 18155 (78.2) | 5012 (81.8) | 7179 (76.3) | 914 (66.1)  | 31260 (78.0) |
| Mean (SD) age at questionnaire completion, years     | 58.9 (12.5)  | 53.8 (12.5) | 51.6 (12.7) | 50.7 (12.3) | 56.1 (13.0)  |
| Smoking status <sup>2</sup> , n (%)                  |              |             |             |             |              |
| Never smoker                                         | 10073 (55.7) | 2786 (55.6) | 4339 (60.5) | 547 (59.9)  | 17745 (56.9) |
| Former smoker                                        | 6927 (38.3)  | 1961 (39.2) | 2460 (34.3) | 330 (36.1)  | 11678 (37.5) |
| Current smoker                                       | 1094 (6.0)   | 260 (5.2)   | 367 (5.1)   | 36 (3.9)    | 1757 (5.6)   |
| Mean (SD) alcohol consumption, g/d                   | 8.7 (9.3)    | 8.2 (8.7)   | 7.6 (8.9)   | 6.7 (9.2)   | 8.3 (9.1)    |
| Self-reported current health <sup>2</sup> , n (%)    |              |             |             |             |              |
| Excellent                                            | 3713 (21.9)  | 1323 (28.1) | 1950 (28.7) | 325 (37.2)  | 7311 (24.9)  |
| Good                                                 | 9962 (58.8)  | 2688 (57.0) | 3851 (56.6) | 446 (51.0)  | 16947 (57.8) |
| Fair                                                 | 2858 (16.9)  | 612 (13.0)  | 876 (12.9)  | 80 (9.2)    | 4426 (15.1)  |
| Poor                                                 | 400 (2.4)    | 92 (2.0)    | 122 (1.8)   | 23 (2.6)    | 637 (2.2)    |
| Townsend deprivation index <sup>2</sup> , n (%)      |              |             |             |             |              |
| Richest category                                     | 4463 (27.6)  | 984 (21.8)  | 1542 (23.7) | 153 (18.3)  | 7141 (25.5)  |
| Poorest category                                     | 3438 (21.2)  | 1207 (26.8) | 1732 (26.7) | 285 (34.1)  | 6662 (23.8)  |
| In same diet group at recruitment, n (%)             | 15908 (87.7) | 3057 (61.1) | 6373 (89.1) | 573 (62.7)  | 25911 (83.0) |
| Taking medication in the past 4 weeks, n (%)         | 10196 (56.2) | 2105 (42.0) | 2829 (39.4) | 255 (27.9)  | 15385 (49.2) |
| Number of reported illnesses and conditions, n (%)   |              |             |             |             |              |
| None                                                 | 4455 (24.5)  | 1635 (32.6) | 2603 (36.3) | 344 (37.6)  | 9037 (28.9)  |
| One                                                  | 4724 (26.0)  | 1472 (29.4) | 2170 (30.2) | 291 (31.8)  | 8657 (27.7)  |
| Two                                                  | 3682 (20.3)  | 906 (18.1)  | 1261 (17.6) | 154 (16.8)  | 6003 (19.2)  |
| Three                                                | 2404 (13.2)  | 524 (10.5)  | 630 (8.8)   | 74 (8.1)    | 3632 (11.6)  |
| Four or more                                         | 2890 (15.9)  | 475 (9.5)   | 515 (7.2)   | 51 (5.6)    | 3931 (12.6)  |
| Reported high blood pressure <sup>2</sup> , n (%)    | 4397 (29.2)  | 686 (16.2)  | 944 (15.2)  | 85 (10.6)   | 6112 (23.2)  |
| and taking appropriate medication, n (%)             | 2573 (58.5)  | 357 (52.0)  | 430 (45.6)  | 40 (47.1)   | 3400 (55.6)  |
| Reported high blood cholesterol <sup>2</sup> , n (%) | 3351 (23.1)  | 561 (13.5)  | 645 (10.5)  | 44 (5.5)    | 4601 (18.0)  |
| and taking appropriate medication, n (%)             | 1646 (49.1)  | 209 (37.3)  | 243 (37.7)  | 14 (31.8)   | 2112 (45.9)  |
| Reported asthma <sup>2</sup> , n (%)                 | 1885 (13.6)  | 496 (12.1)  | 758 (12.4)  | 88 (11.1)   | 3227 (12.9)  |
| and taking appropriate medication, n (%)             | 737 (39.1)   | 169 (34.1)  | 246 (32.5)  | 17 (19.3)   | 1169 (36.2)  |
| Reported diabetes <sup>2</sup> , n (%)               | 707 (5.2)    | 75 (1.9)    | 119 (2.0)   | 7 (0.9)     | 908 (3.7)    |
| and taking appropriate medication, n (%)             | 446 (63.1)   | 41 (54.7)   | 84 (70.6)   | 6 (85.7)    | 577 (63.5)   |
| Reported thyroid disease <sup>2</sup> , n (%)        | 1545 (11.1)  | 380 (9.2)   | 465 (7.6)   | 56 (7.1)    | 2446 (9.8)   |
| and taking appropriate medication, n (%)             | 1191 (77.1)  | 273 (71.8)  | 337 (72.5)  | 37 (66.1)   | 1838 (75.1)  |

1. Based on participant characteristics at the time of the second follow-up questionnaire (completed approximately 10 years from baseline, around 2007).

2. Unknown for some participants.

Table 2 Participation in screening by diet group of women and men in the EPIC-Oxford study.

| Screening/Diet group                                 | Number answering the relevant question <sup>1</sup> | Number (%) answering in the affirmative <sup>1</sup> | Prevalence ratio (95% CI) <sup>1</sup> |
|------------------------------------------------------|-----------------------------------------------------|------------------------------------------------------|----------------------------------------|
| <b>Breast screening<sup>2</sup></b>                  |                                                     |                                                      |                                        |
| Meat eaters                                          | 9239                                                | 8813 (95.4)                                          | 1.00 (ref)                             |
| Fish eaters                                          | 2143                                                | 1928 (90.0)                                          | 0.96 (0.92,1.01)                       |
| Vegetarians                                          | 2395                                                | 2078 (86.8)                                          | 0.94 (0.89,0.98)                       |
| Vegans                                               | 239                                                 | 182 (76.2)                                           | 0.82 (0.71,0.95)                       |
|                                                      |                                                     |                                                      | <i>P-het=0.004</i>                     |
| <b>Cervical screening<sup>3</sup></b>                |                                                     |                                                      |                                        |
| Meat eaters                                          | 15936                                               | 15365 (96.4)                                         | 1.00 (ref)                             |
| Fish eaters                                          | 4513                                                | 4369 (96.8)                                          | 1.00 (0.97,1.03)                       |
| Vegetarians                                          | 6574                                                | 6268 (95.3)                                          | 0.98 (0.95,1.01)                       |
| Vegans                                               | 758                                                 | 691 (91.2)                                           | 0.94 (0.87,1.02)                       |
|                                                      |                                                     |                                                      | <i>P-het=0.37</i>                      |
| <b>Prostate specific antigen testing<sup>4</sup></b> |                                                     |                                                      |                                        |
| Meat eaters                                          | 3078                                                | 1066 (34.6)                                          | 1.00 (ref)                             |
| Fish eaters                                          | 594                                                 | 181 (30.5)                                           | 0.99 (0.85,1.17)                       |
| Vegetarians                                          | 947                                                 | 228 (24.1)                                           | 0.82 (0.71,0.96)                       |
| Vegans                                               | 164                                                 | 33 (20.1)                                            | 0.72 (0.50,1.02)                       |
|                                                      |                                                     |                                                      | <i>P-het=0.023</i>                     |

1. Number answering the relevant question and number (%) answering in the affirmative were as observed. Prevalence ratios were adjusted for age at follow-up (<40, 40-44, 45-49, 50-54, 55-59, 60-64, 65-69, 70-74, ≥75 years, as appropriate according to the age range of included participants), region of residence (eight regions), and self-reported current health (excellent, good, fair, poor, unknown).
2. Included women aged 50 to 74 who answered the relevant question on the second (10 year) follow-up questionnaire.
3. Included women aged 25 to 74 who answered the relevant question on the first (5 year) follow-up questionnaire.
4. Included men aged 50 to 84 who answered the relevant question on the second (10 year) follow-up questionnaire.

Table 3 Use of hormone replacement therapy by diet group of women in the EPIC-Oxford study.

| Diet group  | Number answering the relevant question <sup>1</sup> | Number (%) answering in the affirmative <sup>1</sup> | Prevalence ratio (95% CI) <sup>1</sup> |
|-------------|-----------------------------------------------------|------------------------------------------------------|----------------------------------------|
| Meat eaters | 6911                                                | 3098 (44.8)                                          | 1.00 (ref)                             |
| Fish eaters | 1614                                                | 541 (33.5)                                           | 0.80 (0.73,0.88)                       |
| Vegetarians | 1778                                                | 541 (30.4)                                           | 0.74 (0.68,0.81)                       |
| Vegans      | 188                                                 | 31 (16.5)                                            | 0.42 (0.30,0.60)                       |
|             |                                                     |                                                      | <i>P-het&lt;0.0001</i>                 |

1. Number answering the relevant question and number (%) answering in the affirmative were as observed. Prevalence ratios were adjusted for age at follow-up (50-54, 55-59, 60-64, 65-69, 70-74 years), region of residence (eight regions), and self-reported current health (excellent, good, fair, poor, unknown). Included post-menopausal women aged 50 to 74 who answered the relevant question on the second (10 year) follow-up questionnaire.

Table 4 Medication use by number of self-reported illnesses or conditions and diet group of participants in the EPIC-Oxford study.<sup>1</sup>

| Number of self-reported illnesses or conditions / Diet group | Number of participants <sup>2</sup> | Percentage taking any medication <sup>2</sup> | Prevalence ratio (95% CI) <sup>2</sup> |
|--------------------------------------------------------------|-------------------------------------|-----------------------------------------------|----------------------------------------|
| <b>Any number<sup>3</sup></b>                                |                                     |                                               |                                        |
| Meat eaters                                                  | 18155                               | 56.2                                          | 1.00 (ref)                             |
| Fish eaters                                                  | 5012                                | 42.0                                          | 0.92 (0.87-0.96)                       |
| Vegetarians                                                  | 7179                                | 39.4                                          | 0.93 (0.89-0.98)                       |
| Vegans                                                       | 914                                 | 27.9                                          | 0.71 (0.63-0.81)                       |
|                                                              |                                     |                                               | <i>P-het</i> <0.0001                   |
| <b>None</b>                                                  |                                     |                                               |                                        |
| Meat eaters                                                  | 4455                                | 16.9                                          | 1.00 (ref)                             |
| Fish eaters                                                  | 1635                                | 11.9                                          | 0.80 (0.68-0.94)                       |
| Vegetarians                                                  | 2603                                | 11.5                                          | 0.80 (0.70-0.92)                       |
| Vegans                                                       | 344                                 | 6.1                                           | 0.47 (0.30-0.72)                       |
|                                                              |                                     |                                               | <i>P-het</i> <0.0001                   |
| <b>One</b>                                                   |                                     |                                               |                                        |
| Meat eaters                                                  | 4724                                | 48.9                                          | 1.00 (ref)                             |
| Fish eaters                                                  | 1472                                | 39.1                                          | 0.87 (0.80-0.96)                       |
| Vegetarians                                                  | 2170                                | 40.5                                          | 0.91 (0.84-0.99)                       |
| Vegans                                                       | 291                                 | 29.2                                          | 0.69 (0.55-0.85)                       |
|                                                              |                                     |                                               | <i>P-het</i> =0.0002                   |
| <b>Two</b>                                                   |                                     |                                               |                                        |
| Meat eaters                                                  | 3682                                | 66.9                                          | 1.00 (ref)                             |
| Fish eaters                                                  | 906                                 | 58.8                                          | 0.94 (0.86-1.04)                       |
| Vegetarians                                                  | 1261                                | 58.1                                          | 0.97 (0.89-1.06)                       |
| Vegans                                                       | 154                                 | 42.2                                          | 0.74 (0.58-0.95)                       |
|                                                              |                                     |                                               | <i>P-het</i> =0.082                    |
| <b>Three</b>                                                 |                                     |                                               |                                        |
| Meat eaters                                                  | 2404                                | 82.6                                          | 1.00 (ref)                             |
| Fish eaters                                                  | 524                                 | 74.0                                          | 0.94 (0.84-1.05)                       |
| Vegetarians                                                  | 630                                 | 73.0                                          | 0.94 (0.84-1.04)                       |
| Vegans                                                       | 74                                  | 59.5                                          | 0.78 (0.57-1.05)                       |
|                                                              |                                     |                                               | <i>P-het</i> =0.22                     |
| <b>Four or more</b>                                          |                                     |                                               |                                        |
| Meat eaters                                                  | 2890                                | 93.0                                          | 1.00 (ref)                             |
| Fish eaters                                                  | 475                                 | 86.9                                          | 0.96 (0.86-1.06)                       |
| Vegetarians                                                  | 515                                 | 88.9                                          | 0.98 (0.89-1.09)                       |
| Vegans                                                       | 51                                  | 78.4                                          | 0.87 (0.63-1.19)                       |
|                                                              |                                     |                                               | <i>P-het</i> =0.70                     |

1. Refers to medication use for most of the past four weeks on the second (10 year) follow-up questionnaire, excluding HRT and contraceptive pills.
2. Number of participants and percentage taking any medication were as observed. Prevalence ratios were adjusted for the cross-classification of sex and age at follow-up (<40, 40-44, 45-49, 50-54, 55-59, 60-64, 65-69, 70-74, ≥75 years), region of residence (eight regions), and self-reported current health (excellent, good, fair, poor, unknown).
3. Prevalence ratios for this category were further adjusted for the number of self-reported illnesses or conditions (0, 1, 2, 3, ≥4).

Table 5 Medication use for specific conditions by diet group of participants in the EPIC-Oxford study.<sup>1</sup>

| Condition/ Diet group                     | Number reporting the condition (mean years since reported diagnosis) <sup>2</sup> | Number (%) taking appropriate medication <sup>2</sup> | Prevalence ratio (95% CI) <sup>2</sup> |
|-------------------------------------------|-----------------------------------------------------------------------------------|-------------------------------------------------------|----------------------------------------|
| <b>High blood pressure<sup>3</sup></b>    |                                                                                   |                                                       |                                        |
| Meat eaters                               | 4397 (9.8)                                                                        | 2573 (58.5)                                           | 1.00 (ref)                             |
| Fish eaters                               | 686 (9.3)                                                                         | 357 (52.0)                                            | 0.97 (0.86-1.08)                       |
| Vegetarians                               | 944 (9.0)                                                                         | 430 (45.6)                                            | 0.91 (0.82-1.01)                       |
| Vegans                                    | 85 (9.0)                                                                          | 40 (47.1)                                             | 0.92 (0.67-1.26)                       |
|                                           |                                                                                   |                                                       | <i>P-het=0.37</i>                      |
| <b>High blood cholesterol<sup>4</sup></b> |                                                                                   |                                                       |                                        |
| Meat eaters                               | 3351 (6.3)                                                                        | 1646 (49.1)                                           | 1.00 (ref)                             |
| Fish eaters                               | 561 (5.3)                                                                         | 209 (37.3)                                            | 0.88 (0.76-1.01)                       |
| Vegetarians                               | 645 (5.5)                                                                         | 243 (37.7)                                            | 0.94 (0.81-1.08)                       |
| Vegans                                    | 44 (7.1)                                                                          | 14 (31.8)                                             | 0.74 (0.44-1.26)                       |
|                                           |                                                                                   |                                                       | <i>P-het=0.20</i>                      |
| <b>Asthma<sup>5</sup></b>                 |                                                                                   |                                                       |                                        |
| Meat eaters                               | 1885 (25.3)                                                                       | 737 (39.1)                                            | 1.00 (ref)                             |
| Fish eaters                               | 496 (23.2)                                                                        | 169 (34.1)                                            | 0.98 (0.82-1.17)                       |
| Vegetarians                               | 758 (23.4)                                                                        | 246 (32.5)                                            | 0.97 (0.84-1.14)                       |
| Vegans                                    | 88 (27.9)                                                                         | 17 (19.3)                                             | 0.67 (0.41-1.09)                       |
|                                           |                                                                                   |                                                       | <i>P-het=0.45</i>                      |
| <b>Diabetes<sup>6</sup></b>               |                                                                                   |                                                       |                                        |
| Meat eaters                               | 707 (10.0)                                                                        | 446 (63.1)                                            | 1.00 (ref)                             |
| Fish eaters                               | 75 (14.8)                                                                         | 41 (54.7)                                             | 0.78 (0.56-1.08)                       |
| Vegetarians                               | 119 (10.6)                                                                        | 84 (70.6)                                             | 1.05 (0.81-1.35)                       |
| Vegans                                    | 7 (13.2)                                                                          | 6 (85.7)                                              | 1.07 (0.45-2.51)                       |
|                                           |                                                                                   |                                                       | <i>P-het=0.46</i>                      |
| <b>Thyroid disease<sup>7</sup></b>        |                                                                                   |                                                       |                                        |
| Meat eaters                               | 1545 (13.2)                                                                       | 1191 (77.1)                                           | 1.00 (ref)                             |
| Fish eaters                               | 380 (11.6)                                                                        | 273 (71.8)                                            | 0.95 (0.83-1.09)                       |
| Vegetarians                               | 465 (11.2)                                                                        | 337 (72.5)                                            | 0.97 (0.85-1.10)                       |
| Vegans                                    | 56 (11.8)                                                                         | 37 (66.1)                                             | 0.88 (0.63-1.22)                       |
|                                           |                                                                                   |                                                       | <i>P-het=0.78</i>                      |

- Refers to medication use for most the past four weeks specific to the condition described, among participants who reported diagnosis for the condition on the second (10 year) follow-up questionnaire.
- Number reporting the condition (mean years since reported diagnosis) and number (%) taking appropriate medication were as observed. Prevalence ratios were adjusted for the cross-classification of sex and age at follow-up (<40, 40-44, 45-49, 50-54, 55-59, 60-64, 65-69, 70-74, ≥75 years), region of residence (eight regions), self-reported current health (excellent, good, fair, poor, unknown), years since reported diagnosis (calculated as year of follow-up questionnaire completion minus reported year of diagnosis; <2, 2-3, 4-5, 6-9, ≥10 years, unknown), and number of self-reported illnesses or conditions (1, 2, 3, ≥4).
- Reported use of at least one of amlodipine, enalapril, frusemide, propranolol, atenolol, bendrofluzide, lisinopril and nifedipine.
- Reported use of at least one of atorvastatin and simvastatin.
- Reported use of at least one of beclomethasone and salbutamol.
- Reported use of at least one of insulin and metformin.
- Reported use of thyroxine.

1  
2  
3 **1 REFERENCES**  
4

- 5  
6 1 Davey GK, Spencer EA, Appleby PN, *et al.* EPIC-Oxford: lifestyle characteristics and  
7  
8 3 nutrient intakes in a cohort of 33 883 meat-eaters and 31 546 non meat-eaters in the  
9  
10 4 UK. *Public Health Nutr* 2003;**6**:259–68. doi:10.1079/PHN2002430  
11  
12  
13 5 2 Appleby PN, Davey GK, Key TJ. Hypertension and blood pressure among meat eaters,  
14  
15 6 fish eaters, vegetarians and vegans in EPIC-Oxford. *Public Health Nutr* 2002;**5**:645–  
16  
17 7 54. doi:10.1079/PHN2002332  
18  
19  
20 8 3 Wang F, Zheng J, Yang B, *et al.* Effects of Vegetarian Diets on Blood Lipids: A  
21  
22 9 Systematic Review and Meta-Analysis of Randomized Controlled Trials. *J Am Heart*  
23  
24 10 *Assoc* 2015;**4**:e002408. doi:10.1161/JAHA.115.002408  
25  
26  
27 11 4 Key TJ, Appleby PN, Crowe FL, *et al.* Cancer in British vegetarians: Updated analyses  
28  
29 12 of 4998 incident cancers in a cohort of 32,491 meat eaters, 8612 fish eaters, 18,298  
30  
31 13 vegetarians, and 2246 vegans. *Am J Clin Nutr* 2014;**100**:378–85.  
32  
33 14 doi:10.3945/ajcn.113.071266  
34  
35  
36  
37 15 5 Tantamango-Bartley Y, Jaceldo-Siegl K, Fan J, *et al.* Vegetarian Diets and the  
38  
39 16 Incidence of Cancer in a Low-risk Population. *Cancer Epidemiol Biomarkers Prev*  
40  
41 17 2013;**22**:286–94. doi:10.1158/1055-9965.EPI-12-1060  
42  
43  
44 18 6 Independent UK Panel on Breast Cancer Screening. The benefits and harms of breast  
45  
46 19 cancer screening: an independent review. *Lancet* 2012;**380**:1778–86.  
47  
48 20 doi:10.1016/S0140-6736(12)61611-0  
49  
50  
51 21 7 Beral V, Banks E, Bull D, *et al.* Breast cancer and hormone replacement therapy in the  
52  
53 22 Million Women Study. *Lancet* 2003;**362**:419–27. doi:10.1080/13697130400014698  
54  
55  
56  
57  
58  
59  
60



- 1  
2  
3 23 8 Rossouw JE, Anderson GL, Prentice RL, *et al.* Risks and benefits of estrogen plus  
4  
5 24 progestin in healthy postmenopausal women: principal results From the Women's  
6  
7 25 Health Initiative randomized controlled trial. *JAMA* 2002;**288**:321–33.  
8  
9  
10 26 9 Lagerlund M, Drake I, Wirfält E, *et al.* Health-related lifestyle factors and  
11  
12 27 mammography screening attendance in a Swedish cohort study. *Eur J Cancer Prev*  
13  
14 28 2015;**24**:44–50. doi:10.1097/CEJ.0000000000000025  
15  
16  
17 29 10 Ibrayev Y, Oda K, Fraser GE, *et al.* Utilization of prostate cancer screening according  
18  
19 30 to dietary patterns and other demographic variables. The adventist health study-2. *J*  
20  
21 31 *Cancer* 2013;**4**:416–26. doi:10.7150/jca.6442  
22  
23  
24 32 11 Crowe FL, Appleby PN, Travis RC, *et al.* Risk of hospitalization or death from  
25  
26 33 ischemic heart disease among British vegetarians and nonvegetarians: results from the  
27  
28 34 EPIC-Oxford cohort study. *Am J Clin Nutr* 2013;**97**:597–603.  
29  
30 35 doi:10.3945/ajcn.112.044073  
31  
32  
33  
34 36 12 Appleby PN, Crowe FL, Bradbury KE, *et al.* Mortality in vegetarians and comparable  
35  
36 37 nonvegetarians in the United Kingdom. *Am J Clin Nutr* 2016;**103**:218–30.  
37  
38 38 doi:10.3945/ajcn.115.119461  
39  
40  
41 39 13 Alewaeters K, Clarys P, Hebbelinck M, *et al.* Cross-sectional analysis of BMI and  
42  
43 40 some lifestyle variables in Flemish vegetarians compared with non-vegetarians.  
44  
45 41 *Ergonomics* 2005;**48**:1433–44. doi:10.1080/00140130500101031  
46  
47  
48 42 14 Leitzmann C. Vegetarian nutrition: past, present, future 1 – 3. *Am J Clin Nutr*  
49  
50 43 2014;**100**:496S–502S. doi:10.3945/ajcn.113.071365.496S  
51  
52  
53 44 15 Townsend P. *Poverty in the United Kingdom: A Survey of Household Resources and*  
54  
55 45 *Standards of Living*. London, UK: 1979.  
56  
57  
58  
59  
60

- 1  
2  
3 46 16 Herbert A. Is cervical screening working? A cytopathologist's view from the United  
4  
5 47 Kingdom. *Hum Pathol* 1997;**28**:120–6.  
6  
7  
8 48 17 National Health Service. NHS Choices: Breast cancer screening.  
9  
10 49 2015.<http://www.nhs.uk/conditions/breast-cancer-screening/Pages/Introduction.aspx>  
11  
12 50 (accessed 27 Feb2017).  
13  
14  
15 51 18 National Health Service. NHS Choices: Cervical screening.  
16  
17 52 2015.[http://www.nhs.uk/Conditions/Cervical-screening-](http://www.nhs.uk/Conditions/Cervical-screening-test/Pages/Introduction.aspx#main-navigation)  
18  
19 53 [test/Pages/Introduction.aspx#main-navigation](http://www.nhs.uk/Conditions/Cervical-screening-test/Pages/Introduction.aspx#main-navigation) (accessed 27 Feb2017).  
20  
21  
22 54 19 National Health Service. NHS Choices: Prostate Cancer -PSA testing.  
23  
24 55 2015.<http://www.nhs.uk/Conditions/Cancer-of-the-prostate/Pages/Prevention.aspx>  
25  
26 56 (accessed 27 Feb2017).  
27  
28  
29 57 20 Donnelly TT, Al Khater A-H, Al-Bader SB, *et al.* Beliefs and attitudes about breast  
30  
31 58 cancer and screening practices among Arab women living in Qatar: a cross-sectional  
32  
33 59 study. *BMC Womens Health* 2013;**13**:49. doi:10.1186/1472-6874-13-49  
34  
35  
36  
37 60 21 Nijs HGT, Essink-Bot ML, DeKoning HJ, *et al.* Why do men refuse or attend  
38  
39 61 population-based screening for prostate cancer? *J Public Health Med* 2000;**22**:312–6.  
40  
41 62 doi:10.1093/pubmed/22.3.312  
42  
43  
44 63 22 Chan CWH, Yang S, Gu C, *et al.* Perception of Cervical Cancer Risk and Screening  
45  
46 64 Behavior: A Literature Review. *Int J Nurs Knowl* 2014;**26**:2–18. doi:10.1111/2047-  
47  
48 65 3095.12028  
49  
50  
51 66 23 Jensen LF, Mukai TO, Andersen B, *et al.* The association between general  
52  
53 67 practitioners' attitudes towards breast cancer screening and women's screening  
54  
55 68 participation. *BMC Cancer* 2012;**12**:254. doi:10.1186/1471-2407-12-254  
56  
57  
58  
59  
60

- 1  
2  
3 69 24 Jepson RG, Hewison J, Thompson A, *et al.* Patient perspectives on information and  
4  
5 70 choice in cancer screening: A qualitative study in the UK. *Soc Sci Med* 2007;**65**:890–9.  
6  
7 71 doi:10.1016/j.socscimed.2007.04.009  
8  
9  
10 72 25 Scholes S, Faulding S, Mindell J. Use of prescribed medicines. Health Survey for  
11  
12 73 England 2013. 2013.  
13  
14  
15 74 26 Tatham KC, Patel KP. Suitability of common drugs for patients who avoid animal  
16  
17 75 products. *BMJ* 2014;**348**:g401. doi:10.1136/bmj.g401  
18  
19  
20 76 27 Hayes JH, Barry MJ. Screening for Prostate Cancer With the Prostate-Specific Antigen  
21  
22 77 Test. *JAMA* 2014;**311**:1143. doi:10.1001/jama.2014.2085  
23  
24  
25 78 28 Perez-Cornago A, Key TJ, Allen NE, *et al.* Prospective investigation of risk factors for  
26  
27 79 prostate cancer in the UK Biobank cohort study. *Br J Cancer* 2017;:1–10.  
28  
29 80 doi:10.1038/bjc.2017.312  
30  
31  
32  
33 81  
34  
35  
36 82  
37  
38  
39  
40  
41  
42  
43  
44  
45  
46  
47  
48  
49  
50  
51  
52  
53  
54  
55  
56  
57  
58  
59  
60

1  
2  
3 **Supplementary text 1:** List of 36 named medications on the EPIC-Oxford 10 year follow-up  
4 questionnaire.  
5

6 Alendronate, amlodipine, amitriptyline, aspirin, atenolol, atorvastatin, beclomethasone,  
7 bendrofluazide, co-codamol/co-dydramol, contraceptive pill, co-proxamol, diclofenac,  
8 digoxin, enalapril, etidronate, frusemide, HRT, ibuprofen, insulin, lisinopril, lithium,  
9 Losec/Zoton, metformin, nifedipine, paracetamol, paroxetine, prednisolone, propranolol,  
10 Prozac, risedronate, salbutamol, simvastatin, sleeping pills, tamoxifen, thyroxine, warfarin  
11  
12  
13  
14  
15

16 **Supplementary text 2:** List of 29 named medical conditions asked on the EPIC-Oxford 10  
17 year follow-up questionnaire.  
18

19 Cancer (type of cancer), blood clot in leg, blood clot in lung or elsewhere, stroke, transient  
20 ischaemic attack, angina, heart attack, palpitations/irregular heart beat (cardiac arrhythmia),  
21 diabetes, high blood cholesterol, high blood pressure, asthma, emphysema/chronic bronchitis,  
22 thyroid problem, cataract in eye, stomach or duodenal ulcer, bowel polyps, diverticular  
23 disease, Crohn's disease/ulcerative colitis, coeliac disease, osteoporosis, rheumatoid arthritis,  
24 osteoarthritis, depression/anxiety, gallstones, gallbladder removed, epilepsy, multiple  
25 sclerosis, enlarged prostate (men only)  
26  
27  
28  
29  
30  
31  
32  
33  
34  
35  
36  
37  
38  
39  
40  
41  
42  
43  
44  
45  
46  
47  
48  
49  
50  
51  
52  
53  
54  
55  
56  
57  
58  
59  
60

**Supplementary table 1:** Sensitivity analyses using data from the 5 year follow-up questionnaire or with further adjustment for possible confounders.

| Sensitivity analyses / Health behaviour of interest       | Diet group, prevalence ratio (95% CI) |                  |                  |                  |
|-----------------------------------------------------------|---------------------------------------|------------------|------------------|------------------|
|                                                           | Meat eaters                           | Fish eaters      | Vegetarians      | Vegans           |
| <b>Using data from the 5 year follow-up questionnaire</b> |                                       |                  |                  |                  |
| Breast screening <sup>1</sup>                             | 1.00 (ref)                            | 0.95 (0.90-1.00) | 0.94 (0.89-0.99) | 0.77 (0.67-0.89) |
| Hormone replacement therapy use <sup>1</sup>              | 1.00 (ref)                            | 0.82 (0.76-0.89) | 0.73 (0.67-0.80) | 0.52 (0.40-0.68) |
| <b>Further adjustment for confounders</b>                 |                                       |                  |                  |                  |
| Breast screening <sup>2</sup>                             | 1.00 (ref)                            | 0.97 (0.92-1.02) | 0.94 (0.89-0.99) | 0.83 (0.71-0.96) |
| Cervical screening <sup>2</sup>                           | 1.00 (ref)                            | 1.00 (0.97-1.03) | 0.99 (0.96-1.02) | 0.95 (0.99-1.02) |
| Prostate specific antigen testing <sup>2</sup>            | 1.00 (ref)                            | 1.00 (0.85-1.17) | 0.83 (0.72-0.97) | 0.76 (0.53-1.08) |
| Hormone replacement therapy use <sup>2</sup>              | 1.00 (ref)                            | 0.81 (0.73-0.88) | 0.76 (0.69-0.84) | 0.44 (0.31-0.63) |
| Any medication use <sup>3</sup>                           | 1.00 (ref)                            | 0.92 (0.88-0.97) | 0.94 (0.90-0.98) | 0.71 (0.63-0.81) |

- Adjusted for age at follow-up (<40, 40-44, 45-49, 50-54, 55-59, 60-64, 65-69, 70-74, ≥75 years, as appropriate according to the age range of included participants), region of residence (eight regions), and self-reported current health (excellent, good, fair, poor, unknown).
- Adjusted for age at follow-up (<40, 40-44, 45-49, 50-54, 55-59, 60-64, 65-69, 70-74, ≥75 years, as appropriate according to the age range of included participants), region of residence (eight regions), self-reported current health (excellent, good, fair, poor, unknown), smoking status (never, former, current, unknown), alcohol consumption (<1 g/day, 1-7 g/day, 8-15 g/day, ≥16 g/day), Townsend index of area-level deprivation (quartiles and unknown), and education level (no qualifications, basic secondary e.g. O level, higher secondary e.g. A level, degree, unknown).
- Adjusted for the cross-classification of sex and age at follow-up (<40, 40-44, 45-49, 50-54, 55-59, 60-64, 65-69, 70-74, ≥75 years), region of residence (eight regions), self-reported current health (excellent, good, fair, poor, unknown), number of self-reported illnesses or conditions (0, 1, 2, 3, ≥4), smoking status (never, former, current, unknown), alcohol consumption (<1 g/day, 1-7 g/day, 8-15 g/day, ≥16 g/day), Townsend index of area-level deprivation (quartiles and unknown), and education level (no qualifications, basic secondary e.g. O level, higher secondary e.g. A level, degree, unknown).

## STROBE Statement—checklist of items that should be included in reports of observational studies

|                              | Item No | Recommendation                                                                                                                                                                                                                                                                                                                                                                                                                                                                                                                                                                                                                                                                                                                     |
|------------------------------|---------|------------------------------------------------------------------------------------------------------------------------------------------------------------------------------------------------------------------------------------------------------------------------------------------------------------------------------------------------------------------------------------------------------------------------------------------------------------------------------------------------------------------------------------------------------------------------------------------------------------------------------------------------------------------------------------------------------------------------------------|
| <b>Title and abstract</b>    | 1       | (a) Indicate the study's design with a commonly used term in the title or the abstract <a href="#">P.1</a><br>(b) Provide in the abstract an informative and balanced summary of what was done and what was found <a href="#">P.2</a>                                                                                                                                                                                                                                                                                                                                                                                                                                                                                              |
| <b>Introduction</b>          |         |                                                                                                                                                                                                                                                                                                                                                                                                                                                                                                                                                                                                                                                                                                                                    |
| Background/rationale         | 2       | Explain the scientific background and rationale for the investigation being reported <a href="#">P.4</a>                                                                                                                                                                                                                                                                                                                                                                                                                                                                                                                                                                                                                           |
| Objectives                   | 3       | State specific objectives, including any prespecified hypotheses <a href="#">P.5 Lines 71-74</a>                                                                                                                                                                                                                                                                                                                                                                                                                                                                                                                                                                                                                                   |
| <b>Methods</b>               |         |                                                                                                                                                                                                                                                                                                                                                                                                                                                                                                                                                                                                                                                                                                                                    |
| Study design                 | 4       | Present key elements of study design early in the paper <a href="#">P.5 Lines 78, P.7 Lines 127-129</a>                                                                                                                                                                                                                                                                                                                                                                                                                                                                                                                                                                                                                            |
| Setting                      | 5       | Describe the setting, locations, and relevant dates, including periods of recruitment, exposure, follow-up, and data collection <a href="#">P.5-7 Lines 77-124</a>                                                                                                                                                                                                                                                                                                                                                                                                                                                                                                                                                                 |
| Participants                 | 6       | (a) <i>Cohort study</i> —Give the eligibility criteria, and the sources and methods of selection of participants. Describe methods of follow-up<br><i>Case-control study</i> —Give the eligibility criteria, and the sources and methods of case ascertainment and control selection. Give the rationale for the choice of cases and controls<br><i>Cross-sectional study</i> —Give the eligibility criteria, and the sources and methods of selection of participants <a href="#">P.5-6 Lines 80-87</a><br>(b) <i>Cohort study</i> —For matched studies, give matching criteria and number of exposed and unexposed<br><i>Case-control study</i> —For matched studies, give matching criteria and the number of controls per case |
| Variables                    | 7       | Clearly define all outcomes, exposures, predictors, potential confounders, and effect modifiers. Give diagnostic criteria, if applicable <a href="#">P.6-9 Lines 98-124, 141-165</a>                                                                                                                                                                                                                                                                                                                                                                                                                                                                                                                                               |
| Data sources/<br>measurement | 8*      | For each variable of interest, give sources of data and details of methods of assessment (measurement). Describe comparability of assessment methods if there is more than one group <a href="#">P.5-7 Lines 81-119</a>                                                                                                                                                                                                                                                                                                                                                                                                                                                                                                            |
| Bias                         | 9       | Describe any efforts to address potential sources of bias <a href="#">P.7-8 Lines 133-140</a>                                                                                                                                                                                                                                                                                                                                                                                                                                                                                                                                                                                                                                      |
| Study size                   | 10      | Explain how the study size was arrived at <a href="#">P.5 Lines 82-87, P.9 Lines 169-171</a>                                                                                                                                                                                                                                                                                                                                                                                                                                                                                                                                                                                                                                       |
| Quantitative variables       | 11      | Explain how quantitative variables were handled in the analyses. If applicable, describe which groupings were chosen and why <a href="#">P.8-9 Lines 144-164</a>                                                                                                                                                                                                                                                                                                                                                                                                                                                                                                                                                                   |
| Statistical methods          | 12      | (a) Describe all statistical methods, including those used to control for confounding <a href="#">P.7-9 Lines 126-165</a><br>(b) Describe any methods used to examine subgroups and interactions <a href="#">P.8 Lines 159-160</a><br>(c) Explain how missing data were addressed <a href="#">P.8-9 Lines 148, 158, 160-164</a><br>(d) <i>Cohort study</i> —If applicable, explain how loss to follow-up was addressed<br><i>Case-control study</i> —If applicable, explain how matching of cases and controls was addressed<br><i>Cross-sectional study</i> —If applicable, describe analytical methods taking account of sampling strategy <a href="#">P.7 Lines 127-129</a>                                                     |

1  
2  
3  
4  
5  
6  
7  
8  
9  
10  
11  
12  
13  
14  
15  
16  
17  
18  
19  
20  
21  
22  
23  
24  
25  
26  
27  
28  
29  
30  
31  
32  
33  
34  
35  
36  
37  
38  
39  
40  
41  
42  
43  
44  
45  
46  
47  
48  
49  
50  
51  
52  
53  
54  
55  
56  
57  
58  
59  
60

(e) Describe any sensitivity analyses P.8-9 Lines 159-164

Continued on next page

For peer review only

**Results**

|                          |     |                                                                                                                                                                                                                                                                                                                                                                                                                                                 |
|--------------------------|-----|-------------------------------------------------------------------------------------------------------------------------------------------------------------------------------------------------------------------------------------------------------------------------------------------------------------------------------------------------------------------------------------------------------------------------------------------------|
| Participants             | 13* | (a) Report numbers of individuals at each stage of study—eg numbers potentially eligible, examined for eligibility, confirmed eligible, included in the study, completing follow-up, and analysed <a href="#">P.9 Lines 169-174</a><br>(b) Give reasons for non-participation at each stage <a href="#">P.9 Lines 169-174</a><br>(c) Consider use of a flow diagram                                                                             |
| Descriptive data         | 14* | (a) Give characteristics of study participants (eg demographic, clinical, social) and information on exposures and potential confounders <a href="#">P.9 Lines 175-177, Table 1</a><br>(b) Indicate number of participants with missing data for each variable of interest <a href="#">P.9 Lines 171-174, 180-181</a><br>(c) <i>Cohort study</i> —Summarise follow-up time (eg, average and total amount)                                       |
| Outcome data             | 15* | <i>Cohort study</i> —Report numbers of outcome events or summary measures over time<br><i>Case-control study</i> —Report numbers in each exposure category, or summary measures of exposure<br><i>Cross-sectional study</i> —Report numbers of outcome events or summary measures <a href="#">P.9-10, Table 2-5</a>                                                                                                                             |
| Main results             | 16  | (a) Give unadjusted estimates and, if applicable, confounder-adjusted estimates and their precision (eg, 95% confidence interval). Make clear which confounders were adjusted for and why they were included <a href="#">P.9-10, Table 2-5</a><br>(b) Report category boundaries when continuous variables were categorized<br>(c) If relevant, consider translating estimates of relative risk into absolute risk for a meaningful time period |
| Other analyses           | 17  | Report other analyses done—eg analyses of subgroups and interactions, and sensitivity analyses <a href="#">P.10 Lines 201-204</a>                                                                                                                                                                                                                                                                                                               |
| <b>Discussion</b>        |     |                                                                                                                                                                                                                                                                                                                                                                                                                                                 |
| Key results              | 18  | Summarise key results with reference to study objectives <a href="#">P.11 Lines 208-217</a>                                                                                                                                                                                                                                                                                                                                                     |
| Limitations              | 19  | Discuss limitations of the study, taking into account sources of potential bias or imprecision. Discuss both direction and magnitude of any potential bias <a href="#">P.15 Lines 317-326</a>                                                                                                                                                                                                                                                   |
| Interpretation           | 20  | Give a cautious overall interpretation of results considering objectives, limitations, multiplicity of analyses, results from similar studies, and other relevant evidence <a href="#">P.12-15</a>                                                                                                                                                                                                                                              |
| Generalisability         | 21  | Discuss the generalisability (external validity) of the study results <a href="#">P.11-12, P.15 Lines 322-326</a>                                                                                                                                                                                                                                                                                                                               |
| <b>Other information</b> |     |                                                                                                                                                                                                                                                                                                                                                                                                                                                 |
| Funding                  | 22  | Give the source of funding and the role of the funders for the present study and, if applicable, for the original study on which the present article is based ) <a href="#">P.16 Lines 341-343</a>                                                                                                                                                                                                                                              |

\*Give information separately for cases and controls in case-control studies and, if applicable, for exposed and unexposed groups in cohort and cross-sectional studies.

**Note:** An Explanation and Elaboration article discusses each checklist item and gives methodological background and published examples of transparent reporting. The STROBE checklist is best used in conjunction with this article (freely available on the Web sites of PLoS Medicine at <http://www.plosmedicine.org/>, Annals of Internal Medicine at <http://www.annals.org/>, and Epidemiology at <http://www.epidem.com/>). Information on the STROBE Initiative is available at [www.strobe-statement.org](http://www.strobe-statement.org).
