# Supplementary material for: Cross-sectional analyses of participation in cancer screening and use of hormone replacement therapy and medications in meat eaters and vegetarians: the EPIC-Oxford study
Source: BMJ Open. 2017 Dec 27;7(12):e018245. doi: 10.1136/bmjopen-2017-018245 (PMC5770904; doi:10.1136/bmjopen-2017-018245)
Supplement: Supplementary file 1 [file bmjopen-2017-018245supp001.pdf]

**Supplementary text 1:** List of 36 named medications on the EPIC-Oxford 10 year follow-up questionnaire.

Alendronate, amlodipine, amitriptyline, aspirin, atenolol, atorvastatin, beclomethasone, bendrofluazide, co-codamol/co-dydramol, contraceptive pill, co-proxamol, diclofenac, digoxin, enalapril, etidronate, frusemide, HRT, ibuprofen, insulin, lisinopril, lithium, Losec/Zoton, metformin, nifedipine, paracetamol, paroxetine, prednisolone, propranolol, Prozac, risedronate, salbutamol, simvastatin, sleeping pills, tamoxifen, thyroxine, warfarin

**Supplementary text 2:** List of 29 named medical conditions asked on the EPIC-Oxford 10 year follow-up questionnaire.

Cancer (type of cancer), blood clot in leg, blood clot in lung or elsewhere, stroke, transient ischaemic attack, angina, heart attack, palpitations/irregular heart beat (cardiac arrhythmia), diabetes, high blood cholesterol, high blood pressure, asthma, emphysema/chronic bronchitis, thyroid problem, cataract in eye, stomach or duodenal ulcer, bowel polyps, diverticular disease, Crohn's disease/ulcerative colitis, coeliac disease, osteoporosis, rheumatoid arthritis, osteoarthritis, depression/anxiety, gallstones, gallbladder removed, epilepsy, multiple sclerosis, enlarged prostate (men only)

**Supplementary table 1:** Sensitivity analyses using data from the 5 year follow-up questionnaire or with further adjustment for possible confounders.

| Sensitivity analyses / Health<br>behaviour of interest                                                                                                                                                                                                                                                                                                                                                                                                                                                                                                                                                                           | Meat eaters | Diet group, prevalence ratio (95% CI) |                  |                  |
|----------------------------------------------------------------------------------------------------------------------------------------------------------------------------------------------------------------------------------------------------------------------------------------------------------------------------------------------------------------------------------------------------------------------------------------------------------------------------------------------------------------------------------------------------------------------------------------------------------------------------------|-------------|---------------------------------------|------------------|------------------|
|                                                                                                                                                                                                                                                                                                                                                                                                                                                                                                                                                                                                                                  |             | Fish eaters                           | Vegetarians      | Vegans           |
| Using data from the 5 year follow-up questionnaire                                                                                                                                                                                                                                                                                                                                                                                                                                                                                                                                                                               |             |                                       |                  |                  |
| Breast screening <sup>1</sup>                                                                                                                                                                                                                                                                                                                                                                                                                                                                                                                                                                                                    | 1.00 (ref)  | 0.95 (0.90-1.00)                      | 0.94 (0.89-0.99) | 0.77 (0.67-0.89) |
| Hormone replacement<br>therapy use <sup>1</sup>                                                                                                                                                                                                                                                                                                                                                                                                                                                                                                                                                                                  | 1.00 (ref)  | 0.82 (0.76-0.89)                      | 0.73 (0.67-0.80) | 0.52 (0.40-0.68) |
| Further adjustment for confounders                                                                                                                                                                                                                                                                                                                                                                                                                                                                                                                                                                                               |             |                                       |                  |                  |
| Breast screening <sup>2</sup>                                                                                                                                                                                                                                                                                                                                                                                                                                                                                                                                                                                                    | 1.00 (ref)  | 0.97 (0.92-1.02)                      | 0.94 (0.89-0.99) | 0.83 (0.71-0.96) |
| Cervical screening <sup>2</sup>                                                                                                                                                                                                                                                                                                                                                                                                                                                                                                                                                                                                  | 1.00 (ref)  | 1.00 (0.97-1.03)                      | 0.99 (0.96-1.02) | 0.95 (0.99-1.02) |
| Prostate specific antigen<br>testing <sup>2</sup>                                                                                                                                                                                                                                                                                                                                                                                                                                                                                                                                                                                | 1.00 (ref)  | 1.00 (0.85-1.17)                      | 0.83 (0.72-0.97) | 0.76 (0.53-1.08) |
| Hormone replacement<br>therapy use <sup>2</sup>                                                                                                                                                                                                                                                                                                                                                                                                                                                                                                                                                                                  | 1.00 (ref)  | 0.81 (0.73-0.88)                      | 0.76 (0.69-0.84) | 0.44 (0.31-0.63) |
| Any medication use <sup>3</sup>                                                                                                                                                                                                                                                                                                                                                                                                                                                                                                                                                                                                  | 1.00 (ref)  | 0.92 (0.88-0.97)                      | 0.94 (0.90-0.98) | 0.71 (0.63-0.81) |
| 1. Adjusted for age at follow-up (<40, 40-44, 45-49, 50-54, 55-59, 60-64, 65-69, 70-74, ≥75 years, as appropriate according to the age range of included participants), region of residence (eight regions), and self-reported current health (excellent, good, fair, poor, unknown).                                                                                                                                                                                                                                                                                                                                            |             |                                       |                  |                  |
| 2. Adjusted for age at follow-up (<40, 40-44, 45-49, 50-54, 55-59, 60-64, 65-69, 70-74, ≥75 years, as appropriate according to the age range of included participants), region of residence (eight regions), self-reported current health (excellent, good, fair, poor, unknown), smoking status (never, former, current, unknown), alcohol consumption (<1 g/day, 1-7 g/day, 8-15 g/day, ≥16 g/day), Townsend index of area-level deprivation (quartiles and unknown), and education level (no qualifications, basic secondary e.g. O level, higher secondary e.g. A level, degree, unknown).                                   |             |                                       |                  |                  |
| 3. Adjusted for the cross-classification of sex and age at follow-up (<40, 40-44, 45-49, 50-54, 55-59, 60-64, 65-69, 70-74, ≥75 years), region of residence (eight regions), self-reported current health (excellent, good, fair, poor, unknown), number of self-reported illnesses or conditions (0, 1, 2, 3, ≥4), smoking status (never, former, current, unknown), alcohol consumption (<1 g/day, 1-7 g/day, 8-15 g/day, ≥16 g/day), Townsend index of area-level deprivation (quartiles and unknown), and education level (no qualifications, basic secondary e.g. O level, higher secondary e.g. A level, degree, unknown). |             |                                       |                  |                  |
